# Supplementary material for: Systematic color tuning of a family of luminescent azole-based organoboron compounds suitable for OLED applications
Source: Royal Society of Chemistry journal article supplement (doi:10.1039/c3dt51853a), 2013-01-01
Supplement: c3dt51853a.pdf [file c3dt51853a.pdf]

Supplementary Material for

**Systematic Color Tuning of a Family of Luminescent Azole-Based Organoboron Compounds for OLED applications.**

Paul Kiprof\*, Jeffrey C. Carlson, Derrick R. Anderson, Victor N. Nemykin

## TDDFT Calculation for 5

B3LYP

Excitation energies and oscillator strengths:

Excited State 1: Singlet-A 3.2647 eV 379.77 nm f=0.2248  
98 -> 99 0.66905

This state for optimization and/or second-order correction.

Total Energy, E(RPA) = -1193.82763139

Copying the excited state density for this state as the 1-particle RhoCI density.

Excited State 2: Singlet-A 3.5980 eV 344.59 nm f=0.0056  
96 -> 99 -0.11310  
97 -> 99 0.69504

Excited State 3: Singlet-A 3.7313 eV 332.28 nm f=0.0060  
96 -> 99 0.69427  
97 -> 99 0.11296

Excited State 4: Singlet-A 3.8139 eV 325.08 nm f=0.0103  
94 -> 99 0.14194  
95 -> 99 0.68859

Excited State 5: Singlet-A 3.9154 eV 316.66 nm f=0.0004  
94 -> 99 0.69089  
95 -> 99 -0.14148

Excited State 6: Singlet-A 4.2017 eV 295.08 nm f=0.4226  
93 -> 99 0.65652  
98 ->102 -0.10464

Excited State 7: Singlet-A 4.5168 eV 274.50 nm f=0.0303  
92 -> 99 0.62899  
98 ->100 0.24707

Excited State 8: Singlet-A 4.7482 eV 261.12 nm f=0.0218  
91 -> 99 -0.13748  
92 -> 99 -0.21577  
98 ->100 0.62955

Excited State 9: Singlet-A 4.9169 eV 252.16 nm f=0.0809  
91 -> 99 0.66308  
98 ->100 0.11309  
98 ->102 -0.11238

Excited State 10: Singlet-A 5.0522 eV 245.40 nm f=0.0060  
95 ->100 -0.11233  
97 ->100 0.63861  
98 ->101 -0.12554

Excited State 11: Singlet-A 5.0573 eV 245.16 nm f=0.0376  
90 -> 99 -0.20850  
92 -> 99 0.10009

97 ->100 0.14881  
98 ->101 0.56431  
98 ->102 0.27956

Excited State 12: Singlet-A 5.1305 eV 241.66 nm f=0.0104

95 ->100 -0.17670  
95 ->103 -0.10983  
95 ->105 -0.10073  
96 ->100 0.57842  
98 ->102 0.10440

Excited State 13: Singlet-A 5.1336 eV 241.51 nm f=0.1073

90 -> 99 -0.13717  
91 -> 99 0.10546  
96 ->100 -0.10477  
98 ->101 -0.32341  
98 ->102 0.51120  
98 ->103 0.16382

Excited State 14: Singlet-A 5.2079 eV 238.07 nm f=0.0031

90 -> 99 0.13621  
94 ->103 -0.13372  
95 ->100 0.38054  
95 ->105 0.11071  
95 ->106 -0.10677  
96 ->100 0.17178  
97 ->100 0.20138  
97 ->102 0.18115  
97 ->103 0.11363  
97 ->105 -0.15261  
97 ->106 -0.11440  
98 ->103 0.25983

Excited State 15: Singlet-A 5.2269 eV 237.20 nm f=0.0010

90 -> 99 0.20272  
95 ->100 -0.37636  
96 ->100 -0.18834  
98 ->103 0.46603

Excited State 16: Singlet-A 5.2710 eV 235.22 nm f=0.0099

90 -> 99 0.11660  
94 ->100 -0.15565  
94 ->102 0.10007  
94 ->103 0.16640  
95 ->100 0.38156  
95 ->103 -0.11574  
95 ->105 -0.19499  
97 ->102 -0.21508  
97 ->103 -0.14411  
97 ->105 0.14826  
98 ->103 0.17198  
98 ->105 -0.12968

Excited State 17: Singlet-A 5.2744 eV 235.07 nm f=0.0043

|          |          |
|----------|----------|
| 94 ->106 | -0.15072 |
| 96 ->100 | -0.22763 |
| 96 ->103 | -0.18016 |
| 96 ->105 | 0.11998  |
| 96 ->106 | -0.14204 |
| 97 ->102 | 0.11392  |
| 97 ->106 | -0.10152 |
| 97 ->108 | -0.11824 |
| 97 ->109 | 0.12398  |
| 98 ->103 | -0.17038 |
| 98 ->104 | 0.32335  |
| 98 ->105 | -0.25611 |
| 98 ->106 | -0.11039 |

Excited State 18: Singlet-A 5.3071 eV 233.62 nm f=0.0015

|          |          |
|----------|----------|
| 94 ->106 | 0.10157  |
| 95 ->103 | 0.10484  |
| 95 ->105 | 0.11793  |
| 96 ->100 | 0.14281  |
| 96 ->103 | 0.12897  |
| 96 ->105 | -0.12773 |
| 97 ->108 | 0.10098  |
| 98 ->103 | 0.10767  |
| 98 ->104 | 0.49458  |
| 98 ->106 | -0.11946 |
| 98 ->107 | -0.13678 |

Excited State 19: Singlet-A 5.3171 eV 233.18 nm f=0.0066

|          |         |
|----------|---------|
| 88 -> 99 | 0.23749 |
| 89 -> 99 | 0.61032 |
| 98 ->104 | 0.13034 |

Excited State 20: Singlet-A 5.3372 eV 232.30 nm f=0.0051

|          |         |
|----------|---------|
| 94 ->100 | 0.66138 |
|----------|---------|

Excited State 21: Singlet-A 5.3503 eV 231.73 nm f=0.0005

|          |          |
|----------|----------|
| 90 -> 99 | -0.24831 |
| 98 ->104 | 0.16877  |
| 98 ->106 | 0.56472  |
| 98 ->107 | -0.11801 |

Excited State 22: Singlet-A 5.3798 eV 230.46 nm f=0.0495

|          |          |
|----------|----------|
| 90 -> 99 | -0.21692 |
| 97 ->101 | 0.50480  |
| 97 ->102 | -0.19730 |
| 98 ->103 | 0.14557  |
| 98 ->105 | 0.21590  |
| 98 ->106 | -0.12205 |

Excited State 23: Singlet-A 5.3911 eV 229.98 nm f=0.1362

|          |          |
|----------|----------|
| 90 -> 99 | 0.33496  |
| 93 ->101 | -0.12153 |
| 97 ->101 | 0.40197  |
| 98 ->102 | 0.14768  |

|                             |                              |
|-----------------------------|------------------------------|
| 98 ->103                    | -0.18872                     |
| 98 ->106                    | 0.29273                      |
| Excited State 24: Singlet-A | 5.3952 eV 229.80 nm f=0.0194 |
| 90 -> 99                    | 0.17176                      |
| 97 ->101                    | -0.13006                     |
| 97 ->102                    | 0.17508                      |
| 98 ->104                    | 0.15179                      |
| 98 ->105                    | 0.53068                      |
| 98 ->107                    | -0.16625                     |
| Excited State 25: Singlet-A | 5.4554 eV 227.27 nm f=0.0120 |
| 93 ->100                    | 0.21716                      |
| 96 ->101                    | 0.38205                      |
| 96 ->102                    | -0.16941                     |
| 97 ->101                    | 0.13061                      |
| 97 ->102                    | 0.42138                      |
| 97 ->105                    | 0.12819                      |
| Excited State 26: Singlet-A | 5.4905 eV 225.81 nm f=0.0242 |
| 95 ->101                    | -0.15386                     |
| 96 ->101                    | 0.49635                      |
| 97 ->101                    | -0.13751                     |
| 97 ->102                    | -0.30073                     |
| 97 ->103                    | 0.12069                      |
| 97 ->105                    | -0.14450                     |
| Excited State 27: Singlet-A | 5.5219 eV 224.53 nm f=0.0324 |
| 92 ->101                    | -0.24890                     |
| 93 ->100                    | 0.54692                      |
| 96 ->101                    | -0.21189                     |
| Excited State 28: Singlet-A | 5.5523 eV 223.30 nm f=0.0016 |
| 95 ->101                    | 0.66659                      |
| 96 ->101                    | 0.16474                      |
| Excited State 29: Singlet-A | 5.5876 eV 221.89 nm f=0.0031 |
| 96 ->102                    | -0.23145                     |
| 96 ->105                    | -0.12951                     |
| 97 ->103                    | 0.50288                      |
| 97 ->104                    | -0.20095                     |
| 97 ->105                    | 0.24359                      |
| Excited State 30: Singlet-A | 5.6012 eV 221.35 nm f=0.0019 |
| 98 ->104                    | 0.18997                      |
| 98 ->105                    | 0.14828                      |
| 98 ->107                    | 0.60324                      |
| Excited State 31: Singlet-A | 5.6076 eV 221.10 nm f=0.0079 |
| 94 ->102                    | 0.21865                      |
| 94 ->103                    | 0.10196                      |
| 96 ->102                    | 0.53414                      |
| 96 ->103                    | -0.11825                     |
| 97 ->102                    | 0.11007                      |

97 ->103 0.14410  
97 ->105 0.14358  
98 ->107 0.13310  
98 ->108 0.15100  
98 ->109 -0.10509

Excited State 32: Singlet-A 5.6225 eV 220.51 nm f=0.0273

96 ->102 -0.16591  
98 ->105 -0.10455  
98 ->108 0.50442  
98 ->109 -0.36700

Excited State 33: Singlet-A 5.6530 eV 219.33 nm f=0.0034

94 ->101 0.67459

Excited State 34: Singlet-A 5.6655 eV 218.84 nm f=0.0070

94 ->102 0.15616  
95 ->102 0.56378  
96 ->102 -0.13103  
97 ->103 0.11128  
97 ->104 0.17385  
97 ->106 0.16105

Excited State 35: Singlet-A 5.6845 eV 218.11 nm f=0.0049

95 ->102 -0.23342  
97 ->103 0.20572  
97 ->104 0.51189  
97 ->108 0.12808  
97 ->109 0.14717  
97 ->110 0.16568  
98 ->109 0.10053

Excited State 36: Singlet-A 5.7401 eV 216.00 nm f=0.0134

88 -> 99 0.30498  
89 -> 99 -0.12548  
94 ->102 -0.25283  
95 ->102 0.11587  
96 ->103 -0.31268  
96 ->105 -0.10596  
97 ->103 -0.15165  
97 ->105 0.24109  
97 ->106 -0.18720

Excited State 37: Singlet-A 5.7491 eV 215.66 nm f=0.0013

88 -> 99 0.54251  
89 -> 99 -0.21727  
94 ->102 0.15060  
95 ->102 -0.12934  
96 ->103 0.21677

Excited State 38: Singlet-A 5.7669 eV 214.99 nm f=0.0097

95 ->102 0.13234  
95 ->103 -0.24008  
95 ->105 0.16910

|          |          |
|----------|----------|
| 96 ->103 | 0.27590  |
| 96 ->105 | 0.12767  |
| 96 ->108 | 0.16433  |
| 97 ->105 | 0.30285  |
| 97 ->106 | -0.19141 |
| 97 ->109 | 0.14904  |
| 98 ->109 | -0.16241 |

Excited State 39: Singlet-A 5.7754 eV 214.68 nm f=0.0049

|          |          |
|----------|----------|
| 94 ->102 | 0.15002  |
| 95 ->105 | 0.13894  |
| 96 ->103 | 0.16604  |
| 96 ->104 | -0.20073 |
| 97 ->104 | -0.13236 |
| 98 ->108 | 0.33047  |
| 98 ->109 | 0.42783  |
| 98 ->112 | -0.11716 |

Excited State 40: Singlet-A 5.8038 eV 213.62 nm f=0.0057

|          |         |
|----------|---------|
| 94 ->110 | 0.11242 |
| 95 ->104 | 0.15762 |
| 96 ->104 | 0.53402 |
| 96 ->108 | 0.12066 |
| 96 ->109 | 0.15156 |
| 98 ->108 | 0.13447 |
| 98 ->109 | 0.17611 |

## TDDFT Calculation for **6**

B3LYP

Excitation energies and oscillator strengths:

Excited State 1: Singlet-A 3.0959 eV 400.47 nm f=0.2170  
102 ->103 0.66850

This state for optimization and/or second-order correction.

Total Energy, E(RPA) = -1516.80925887

Copying the excited state density for this state as the 1-particle RhoCl density.

Excited State 2: Singlet-A 3.4389 eV 360.53 nm f=0.0051  
100 ->103 -0.12140  
101 ->103 0.69314

Excited State 3: Singlet-A 3.5444 eV 349.80 nm f=0.0033  
100 ->103 0.69313  
101 ->103 0.12160

Excited State 4: Singlet-A 3.6442 eV 340.23 nm f=0.0058  
98 ->103 -0.14575  
99 ->103 0.68793

Excited State 5: Singlet-A 3.7543 eV 330.25 nm f=0.0004  
98 ->103 0.68992  
99 ->103 0.14456

Excited State 6: Singlet-A 3.9603 eV 313.07 nm f=0.2978  
96 ->103 -0.15969  
97 ->103 0.64633

Excited State 7: Singlet-A 4.1005 eV 302.36 nm f=0.1214  
96 ->103 0.64696  
97 ->103 0.15464  
102 ->104 0.11431

Excited State 8: Singlet-A 4.5938 eV 269.89 nm f=0.0284  
95 ->103 -0.19138  
102 ->104 0.64781

Excited State 9: Singlet-A 4.7112 eV 263.17 nm f=0.0596  
95 ->103 0.65789  
102 ->104 0.18425

Excited State 10: Singlet-A 4.7921 eV 258.73 nm f=0.0059  
102 ->105 0.66238

Excited State 11: Singlet-A 4.9440 eV 250.78 nm f=0.0016  
99 ->104 0.14115  
100 ->104 0.17806  
101 ->104 0.64934

Excited State 12: Singlet-A 4.9695 eV 249.49 nm f=0.0137



|                                                          |          |
|----------------------------------------------------------|----------|
| 99 ->104                                                 | 0.12708  |
| 100 ->104                                                | 0.61873  |
| 101 ->104                                                | -0.21227 |
| 102 ->106                                                | 0.11069  |
| Excited State 13: Singlet-A 4.9913 eV 248.40 nm f=0.0182 |          |
| 94 ->103                                                 | 0.43228  |
| 100 ->104                                                | -0.13247 |
| 102 ->106                                                | 0.29357  |
| 102 ->107                                                | 0.41877  |
| Excited State 14: Singlet-A 5.0395 eV 246.03 nm f=0.0115 |          |
| 92 ->103                                                 | 0.12762  |
| 93 ->103                                                 | 0.63110  |
| 102 ->106                                                | 0.20465  |
| Excited State 15: Singlet-A 5.0456 eV 245.73 nm f=0.0258 |          |
| 93 ->103                                                 | -0.23256 |
| 94 ->103                                                 | -0.18158 |
| 96 ->104                                                 | -0.14640 |
| 102 ->106                                                | 0.54646  |
| 102 ->107                                                | -0.17919 |
| Excited State 16: Singlet-A 5.0899 eV 243.59 nm f=0.0085 |          |
| 99 ->104                                                 | 0.65428  |
| 100 ->104                                                | -0.17203 |
| 101 ->104                                                | -0.10242 |
| Excited State 17: Singlet-A 5.1337 eV 241.51 nm f=0.1102 |          |
| 94 ->103                                                 | -0.36779 |
| 96 ->104                                                 | -0.12809 |
| 96 ->106                                                 | -0.12940 |
| 102 ->107                                                | 0.44163  |
| 102 ->108                                                | 0.20379  |
| Excited State 18: Singlet-A 5.1848 eV 239.13 nm f=0.0115 |          |
| 98 ->104                                                 | 0.62424  |
| 100 ->104                                                | 0.11125  |
| Excited State 19: Singlet-A 5.2238 eV 237.35 nm f=0.0061 |          |
| 94 ->103                                                 | 0.12673  |
| 98 ->104                                                 | 0.22988  |
| 98 ->107                                                 | -0.13377 |
| 98 ->108                                                 | -0.13203 |
| 99 ->104                                                 | -0.12327 |
| 99 ->110                                                 | 0.15230  |
| 100 ->107                                                | 0.13672  |
| 100 ->110                                                | 0.10835  |
| 100 ->113                                                | -0.12510 |
| 101 ->107                                                | 0.11439  |
| 102 ->108                                                | 0.35790  |
| 102 ->109                                                | 0.22622  |
| Excited State 20: Singlet-A 5.2386 eV 236.68 nm f=0.0125 |          |

|           |          |
|-----------|----------|
| 94 ->103  | 0.11179  |
| 98 ->107  | 0.15458  |
| 98 ->111  | 0.14244  |
| 99 ->108  | 0.16282  |
| 99 ->109  | 0.11955  |
| 100 ->104 | 0.11733  |
| 100 ->107 | -0.13784 |
| 100 ->108 | -0.17187 |
| 100 ->110 | -0.22476 |
| 101 ->107 | 0.11258  |
| 101 ->111 | 0.14828  |
| 101 ->113 | 0.18297  |
| 102 ->108 | 0.19392  |
| 102 ->110 | 0.27527  |

Excited State 21: Singlet-A 5.2602 eV 235.70 nm f=0.0059

|           |          |
|-----------|----------|
| 98 ->104  | -0.12599 |
| 98 ->108  | 0.13319  |
| 99 ->110  | -0.14620 |
| 99 ->111  | 0.10754  |
| 100 ->111 | -0.11400 |
| 100 ->113 | 0.10982  |
| 101 ->106 | 0.15905  |
| 101 ->107 | -0.24553 |
| 101 ->108 | -0.12179 |
| 101 ->110 | -0.13474 |
| 101 ->111 | -0.13117 |
| 101 ->113 | -0.11139 |
| 102 ->108 | 0.34327  |
| 102 ->109 | 0.15997  |
| 102 ->110 | 0.13582  |
| 102 ->111 | -0.12430 |

Excited State 22: Singlet-A 5.2991 eV 233.97 nm f=0.0016

|           |          |
|-----------|----------|
| 96 ->105  | 0.13655  |
| 97 ->104  | 0.18054  |
| 100 ->105 | -0.18074 |
| 101 ->105 | 0.60309  |

Excited State 23: Singlet-A 5.3127 eV 233.37 nm f=0.0155

|           |          |
|-----------|----------|
| 97 ->104  | 0.10049  |
| 102 ->108 | -0.20540 |
| 102 ->109 | 0.61730  |

Excited State 24: Singlet-A 5.3266 eV 232.77 nm f=0.0148

|           |          |
|-----------|----------|
| 94 ->103  | -0.10881 |
| 96 ->105  | 0.12674  |
| 96 ->106  | 0.15753  |
| 97 ->104  | 0.46988  |
| 97 ->106  | -0.10945 |
| 100 ->106 | -0.16377 |
| 101 ->105 | -0.27957 |
| 102 ->108 | 0.14953  |

Excited State 25: Singlet-A 5.3667 eV 231.02 nm f=0.0444  
97 ->105 0.10445  
100 ->105 0.21517  
101 ->106 0.40475  
102 ->110 -0.26958  
102 ->111 0.33885

Excited State 26: Singlet-A 5.3723 eV 230.78 nm f=0.0041  
100 ->106 -0.12118  
101 ->106 0.35607  
102 ->108 -0.18000  
102 ->110 0.49810

Excited State 27: Singlet-A 5.3906 eV 230.00 nm f=0.0243  
96 ->105 0.10431  
100 ->105 -0.39097  
100 ->106 -0.11373  
101 ->106 -0.10820  
101 ->107 -0.16980  
102 ->111 0.45114  
102 ->113 0.10009

Excited State 28: Singlet-A 5.4016 eV 229.53 nm f=0.0069  
97 ->104 0.23143  
100 ->105 0.37140  
101 ->105 0.11688  
101 ->106 -0.34239  
102 ->110 0.16123  
102 ->111 0.26179

Excited State 29: Singlet-A 5.4205 eV 228.73 nm f=0.0055  
96 ->105 0.26372  
97 ->105 -0.20708  
99 ->106 0.14153  
100 ->106 0.52812

Excited State 30: Singlet-A 5.4518 eV 227.42 nm f=0.0096  
96 ->105 -0.16429  
97 ->105 0.18680  
99 ->105 0.10018  
100 ->105 -0.20594  
100 ->106 0.15599  
100 ->107 -0.15508  
101 ->107 0.46272  
101 ->110 -0.13246  
102 ->111 0.12774

Excited State 31: Singlet-A 5.4692 eV 226.69 nm f=0.0227  
96 ->104 -0.12375  
96 ->105 0.20333  
96 ->106 -0.11031  
97 ->105 -0.22638  
97 ->106 0.14613  
99 ->105 -0.12253

|           |          |
|-----------|----------|
| 100 ->105 | 0.22475  |
| 100 ->106 | -0.26546 |
| 101 ->107 | 0.29193  |
| 101 ->110 | -0.13793 |

Excited State 32: Singlet-A 5.4932 eV 225.71 nm f=0.0107

|           |          |
|-----------|----------|
| 96 ->104  | -0.10678 |
| 98 ->105  | -0.15693 |
| 99 ->105  | 0.57364  |
| 99 ->106  | 0.25292  |
| 100 ->106 | -0.15846 |

Excited State 33: Singlet-A 5.5337 eV 224.05 nm f=0.0215

|          |          |
|----------|----------|
| 98 ->105 | 0.16087  |
| 99 ->105 | -0.22519 |
| 99 ->106 | 0.59306  |

Excited State 34: Singlet-A 5.5710 eV 222.55 nm f=0.1069

|           |          |
|-----------|----------|
| 92 ->103  | 0.22001  |
| 96 ->104  | -0.33345 |
| 97 ->104  | 0.11223  |
| 97 ->105  | 0.31321  |
| 97 ->106  | 0.12178  |
| 98 ->105  | -0.25620 |
| 98 ->106  | -0.16128 |
| 99 ->105  | -0.14190 |
| 99 ->107  | -0.11166 |
| 100 ->107 | 0.13864  |

Excited State 35: Singlet-A 5.5776 eV 222.29 nm f=0.0824

|           |          |
|-----------|----------|
| 92 ->103  | -0.22082 |
| 96 ->104  | 0.22420  |
| 97 ->104  | -0.11578 |
| 97 ->106  | -0.18161 |
| 98 ->105  | -0.26684 |
| 98 ->106  | -0.14952 |
| 98 ->107  | 0.12628  |
| 99 ->106  | 0.10743  |
| 100 ->107 | 0.36673  |

Excited State 36: Singlet-A 5.5838 eV 222.04 nm f=0.0089

|           |          |
|-----------|----------|
| 92 ->103  | 0.54403  |
| 93 ->103  | -0.12120 |
| 96 ->104  | 0.14008  |
| 97 ->105  | -0.10098 |
| 100 ->107 | 0.16242  |
| 102 ->113 | 0.25233  |

Excited State 37: Singlet-A 5.6032 eV 221.27 nm f=0.0589

|          |          |
|----------|----------|
| 96 ->104 | -0.12281 |
| 96 ->105 | -0.14569 |
| 97 ->105 | -0.17490 |
| 97 ->106 | 0.14059  |
| 98 ->105 | 0.28178  |

|           |          |
|-----------|----------|
| 98 ->106  | -0.25713 |
| 98 ->107  | 0.17537  |
| 99 ->105  | 0.13564  |
| 99 ->106  | -0.11273 |
| 100 ->107 | 0.31224  |
| 101 ->108 | -0.10367 |
| 102 ->113 | -0.18561 |

Excited State 38: Singlet-A 5.6189 eV 220.66 nm f=0.0267

|           |          |
|-----------|----------|
| 92 ->103  | -0.16464 |
| 96 ->105  | -0.17673 |
| 97 ->105  | -0.14776 |
| 98 ->105  | -0.11356 |
| 98 ->106  | -0.32629 |
| 102 ->113 | 0.46194  |

Excited State 39: Singlet-A 5.6247 eV 220.43 nm f=0.0217

|           |          |
|-----------|----------|
| 92 ->103  | -0.14752 |
| 96 ->104  | -0.11240 |
| 96 ->105  | 0.18533  |
| 97 ->105  | 0.19264  |
| 98 ->105  | 0.26378  |
| 98 ->106  | 0.29317  |
| 98 ->107  | 0.17427  |
| 100 ->107 | 0.16526  |
| 102 ->113 | 0.33732  |

Excited State 40: Singlet-A 5.6420 eV 219.75 nm f=0.0041

|           |          |
|-----------|----------|
| 98 ->107  | 0.10975  |
| 101 ->107 | -0.10821 |
| 101 ->108 | 0.54988  |
| 101 ->110 | -0.16161 |
| 102 ->112 | -0.20293 |

## TDDFT Calculation for **7a**

B3LYP

Excitation energies and oscillator strengths:

Excited State 1: Singlet-A 2.7675 eV 447.99 nm f=0.0487  
111 ->112 0.67122

This state for optimization and/or second-order correction.

Total Energy, E(RPA) = -1347.52212958

Copying the excited state density for this state as the 1-particle RhoCI density.

Excited State 2: Singlet-A 3.3801 eV 366.81 nm f=0.0073  
108 ->112 -0.13020  
109 ->112 -0.12799  
110 ->112 0.68041

Excited State 3: Singlet-A 3.4936 eV 354.89 nm f=0.3149  
108 ->112 -0.32554  
109 ->112 0.59661

Excited State 4: Singlet-A 3.5372 eV 350.51 nm f=0.4362  
108 ->112 0.60453  
109 ->112 0.26067  
110 ->112 0.15659

Excited State 5: Singlet-A 3.5988 eV 344.52 nm f=0.0196  
106 ->112 -0.15196  
107 ->112 0.68685

Excited State 6: Singlet-A 3.7028 eV 334.83 nm f=0.0020  
106 ->112 0.68776  
107 ->112 0.15264

Excited State 7: Singlet-A 4.3052 eV 287.99 nm f=0.1951  
103 ->112 -0.12696  
105 ->112 -0.29560  
111 ->113 0.59779

Excited State 8: Singlet-A 4.3485 eV 285.12 nm f=0.1410  
104 ->112 -0.18370  
105 ->112 0.58644  
109 ->114 0.12075  
111 ->113 0.25961

Excited State 9: Singlet-A 4.4940 eV 275.89 nm f=0.0436  
103 ->112 0.41387  
104 ->112 -0.17639  
109 ->113 -0.26207  
110 ->113 -0.10132  
111 ->114 0.40099  
111 ->115 0.13624

Excited State 10: Singlet-A 4.5636 eV 271.68 nm f=0.2406

103 ->112 -0.12737  
104 ->112 0.55398  
105 ->112 0.11854  
111 ->114 0.34874

Excited State 11: Singlet-A 4.6864 eV 264.56 nm f=0.0218

103 ->112 -0.16529  
104 ->112 -0.22085  
109 ->113 0.16507  
109 ->114 -0.10512  
111 ->114 0.39838  
111 ->115 -0.38722  
111 ->120 0.12887

Excited State 12: Singlet-A 4.7867 eV 259.02 nm f=0.2902

102 ->112 0.18552  
103 ->112 0.44937  
104 ->112 0.15430  
109 ->113 0.24159  
110 ->113 0.20595  
111 ->115 -0.27409

Excited State 13: Singlet-A 4.8245 eV 256.99 nm f=0.0136

109 ->113 -0.18270  
110 ->113 0.65213  
111 ->115 0.13876

Excited State 14: Singlet-A 4.8999 eV 253.04 nm f=0.0386

102 ->112 -0.25279  
109 ->113 0.48203  
111 ->115 0.35463

Excited State 15: Singlet-A 4.9510 eV 250.42 nm f=0.0237

101 ->112 -0.14882  
102 ->112 -0.42355  
108 ->113 0.46232  
111 ->115 -0.10706

Excited State 16: Singlet-A 4.9559 eV 250.18 nm f=0.0525

101 ->112 0.12721  
102 ->112 0.29838  
108 ->113 0.47360  
109 ->114 -0.14257  
111 ->115 0.25212  
111 ->116 -0.11127  
111 ->120 0.12845

Excited State 17: Singlet-A 5.0167 eV 247.15 nm f=0.0004

107 ->113 0.61842  
107 ->114 0.10130  
110 ->114 -0.13871  
111 ->116 -0.16734

Excited State 18: Singlet-A 5.0281 eV 246.58 nm f=0.0016

|           |         |
|-----------|---------|
| 107 ->113 | 0.21627 |
| 111 ->116 | 0.61054 |
| 111 ->117 | 0.13787 |
| 111 ->120 | 0.13926 |

Excited State 19: Singlet-A 5.0657 eV 244.75 nm f=0.0089

|           |          |
|-----------|----------|
| 111 ->116 | -0.10078 |
| 111 ->117 | 0.58629  |
| 111 ->118 | 0.19257  |
| 111 ->119 | 0.11099  |
| 111 ->120 | -0.15688 |
| 111 ->121 | -0.21511 |

Excited State 20: Singlet-A 5.0723 eV 244.43 nm f=0.0392

|           |         |
|-----------|---------|
| 106 ->113 | 0.13139 |
| 107 ->113 | 0.15003 |
| 110 ->114 | 0.60183 |

Excited State 21: Singlet-A 5.1038 eV 242.93 nm f=0.0444

|           |          |
|-----------|----------|
| 101 ->112 | 0.12719  |
| 102 ->112 | 0.11226  |
| 105 ->115 | -0.11615 |
| 106 ->113 | -0.11673 |
| 107 ->113 | -0.11107 |
| 109 ->114 | 0.49457  |
| 111 ->117 | 0.10736  |
| 111 ->118 | -0.11750 |
| 111 ->119 | -0.26673 |
| 111 ->120 | -0.10898 |

Excited State 22: Singlet-A 5.1185 eV 242.23 nm f=0.0103

|           |          |
|-----------|----------|
| 106 ->113 | 0.55281  |
| 107 ->114 | 0.10210  |
| 111 ->119 | -0.31901 |
| 111 ->121 | -0.10032 |

Excited State 23: Singlet-A 5.1252 eV 241.91 nm f=0.0543

|           |         |
|-----------|---------|
| 102 ->112 | 0.11481 |
| 106 ->113 | 0.36281 |
| 108 ->114 | 0.10986 |
| 109 ->114 | 0.23159 |
| 111 ->119 | 0.42877 |

Excited State 24: Singlet-A 5.1605 eV 240.26 nm f=0.0028

|           |          |
|-----------|----------|
| 101 ->112 | 0.14848  |
| 106 ->114 | 0.10180  |
| 106 ->116 | -0.14839 |
| 107 ->116 | -0.11558 |
| 107 ->118 | -0.15877 |
| 108 ->114 | 0.46660  |
| 108 ->116 | -0.12629 |
| 108 ->118 | 0.10181  |
| 111 ->118 | 0.15114  |
| 111 ->119 | -0.11670 |



111 ->121 0.13312

Excited State 25: Singlet-A 5.1694 eV 239.84 nm f=0.0185

100 ->112 0.13481

101 ->112 0.55058

102 ->112 -0.18677

111 ->118 -0.12880

111 ->119 0.25259

111 ->121 -0.10597

Excited State 26: Singlet-A 5.1904 eV 238.87 nm f=0.0950

108 ->114 -0.17860

109 ->114 0.16443

111 ->118 0.53357

111 ->120 0.20674

111 ->121 0.12207

111 ->123 -0.11246

Excited State 27: Singlet-A 5.2329 eV 236.93 nm f=0.1776

101 ->112 -0.15203

108 ->114 0.20077

111 ->118 -0.11442

111 ->120 0.42393

111 ->121 -0.34684

Excited State 28: Singlet-A 5.2779 eV 234.91 nm f=0.0281

106 ->116 0.12677

106 ->119 0.15399

107 ->119 -0.15258

108 ->115 -0.11719

108 ->119 -0.16623

108 ->123 -0.10383

109 ->114 -0.15137

110 ->114 0.24019

110 ->116 0.29242

110 ->118 -0.21540

110 ->123 0.14335

111 ->120 -0.10177

Excited State 29: Singlet-A 5.2979 eV 234.02 nm f=0.0051

106 ->114 -0.10600

107 ->114 0.55528

108 ->114 0.27478

110 ->115 -0.15407

Excited State 30: Singlet-A 5.3174 eV 233.17 nm f=0.0011

111 ->116 -0.11116

111 ->117 0.29106

111 ->118 -0.19207

111 ->120 0.30075

111 ->121 0.43886

111 ->124 -0.22823

111 ->125 -0.10967

Excited State 31: Singlet-A 5.3206 eV 233.03 nm f=0.0021  
106 ->114 0.18184  
106 ->116 -0.15134  
107 ->114 0.36647  
107 ->116 -0.11864  
107 ->118 -0.18270  
108 ->114 -0.23665  
108 ->116 -0.12228  
108 ->118 0.13506  
110 ->115 0.27615

Excited State 32: Singlet-A 5.3348 eV 232.41 nm f=0.0089  
106 ->114 -0.16637  
108 ->114 0.17851  
109 ->115 -0.19488  
110 ->115 0.57506

Excited State 33: Singlet-A 5.4096 eV 229.19 nm f=0.0016  
106 ->114 0.36327  
108 ->115 -0.30617  
108 ->116 0.10139  
109 ->115 0.24833  
110 ->115 0.10446  
111 ->122 -0.25448  
111 ->123 0.21649

Excited State 34: Singlet-A 5.4129 eV 229.05 nm f=0.0289  
106 ->114 0.36225  
111 ->122 0.41972  
111 ->123 -0.33040

Excited State 35: Singlet-A 5.4225 eV 228.65 nm f=0.0693  
106 ->114 0.34834  
107 ->115 -0.16398  
108 ->115 0.34148  
109 ->115 -0.35610  
111 ->122 -0.13892

Excited State 36: Singlet-A 5.4519 eV 227.41 nm f=0.0048  
111 ->122 0.33120  
111 ->123 0.47019  
111 ->124 -0.11947  
111 ->125 -0.16945  
111 ->126 0.29552

Excited State 37: Singlet-A 5.4619 eV 227.00 nm f=0.0901  
105 ->113 0.14555  
108 ->115 0.46953  
109 ->115 0.39816  
111 ->123 0.10577

Excited State 38: Singlet-A 5.5040 eV 225.26 nm f=0.0019  
107 ->115 0.66694  
108 ->115 0.14908

Excited State 39: Singlet-A 5.5622 eV 222.90 nm f=0.0064  
100 ->112 0.65972  
101 ->112 -0.16766

Excited State 40: Singlet-A 5.5733 eV 222.46 nm f=0.0027  
111 ->117 0.13764  
111 ->120 0.11564  
111 ->121 0.12688  
111 ->123 0.13717  
111 ->124 0.57785  
111 ->125 0.17209  
111 ->127 -0.12306

## TDDFT Calculation for **7b**

B3LYP

Excitation energies and oscillator strengths:

Excited State 1: Singlet-A 2.6454 eV 468.69 nm f=0.0370  
115 ->116 0.67434

This state for optimization and/or second-order correction.

Total Energy, E(RPA) = -1670.50208778

Copying the excited state density for this state as the 1-particle RhoCI density.

Excited State 2: Singlet-A 3.2544 eV 380.98 nm f=0.0114  
112 ->116 -0.14253  
113 ->116 0.41798  
114 ->116 0.54784

Excited State 3: Singlet-A 3.3351 eV 371.76 nm f=0.4386  
112 ->116 0.21315  
113 ->116 0.54024  
114 ->116 -0.34222

Excited State 4: Singlet-A 3.3829 eV 366.51 nm f=0.2611  
112 ->116 0.65111  
114 ->116 0.21138

Excited State 5: Singlet-A 3.4675 eV 357.56 nm f=0.0280  
110 ->116 -0.14712  
111 ->116 0.68703

Excited State 6: Singlet-A 3.5803 eV 346.29 nm f=0.0056  
110 ->116 0.68847  
111 ->116 0.14752

Excited State 7: Singlet-A 3.9305 eV 315.44 nm f=0.0492  
109 ->116 0.67531

Excited State 8: Singlet-A 4.2727 eV 290.18 nm f=0.2906  
107 ->116 -0.18598  
108 ->116 -0.11618  
115 ->117 0.62408

Excited State 9: Singlet-A 4.3679 eV 283.85 nm f=0.0571  
107 ->116 -0.40785  
108 ->116 0.51390  
113 ->117 0.11610  
114 ->117 -0.12687

Excited State 10: Singlet-A 4.4113 eV 281.06 nm f=0.0173  
108 ->116 0.12674  
115 ->117 0.15711  
115 ->118 0.66894

Excited State 11: Singlet-A 4.5213 eV 274.22 nm f=0.0277  
107 ->116 0.29214  
108 ->116 0.38267  
113 ->117 -0.15569  
114 ->117 0.18517  
115 ->118 -0.10806  
115 ->120 -0.30842  
115 ->125 -0.16618

Excited State 12: Singlet-A 4.6575 eV 266.20 nm f=0.2532  
106 ->116 0.28325  
107 ->116 0.35498  
113 ->117 0.17634  
114 ->117 -0.23922  
115 ->119 0.29307  
115 ->120 0.19323

Excited State 13: Singlet-A 4.6672 eV 265.65 nm f=0.0162  
107 ->116 -0.14735  
114 ->117 0.11720  
115 ->119 0.61383  
115 ->120 -0.22851

Excited State 14: Singlet-A 4.7584 eV 260.56 nm f=0.0537  
105 ->116 -0.25637  
106 ->116 0.52912  
107 ->116 -0.13812  
113 ->117 -0.14881  
114 ->117 0.24053

Excited State 15: Singlet-A 4.8009 eV 258.25 nm f=0.0081  
113 ->117 0.48295  
114 ->117 0.48655

Excited State 16: Singlet-A 4.8548 eV 255.39 nm f=0.0414  
106 ->116 -0.12827  
109 ->120 0.11456  
112 ->117 -0.16007  
113 ->117 -0.30048  
113 ->118 -0.23244  
114 ->117 0.16401  
114 ->118 0.32536  
115 ->120 0.30175

Excited State 17: Singlet-A 4.9013 eV 252.96 nm f=0.0013  
112 ->117 0.53088  
112 ->118 0.19119  
114 ->118 0.35123

Excited State 18: Singlet-A 4.9106 eV 252.48 nm f=0.1136  
105 ->116 0.11412  
112 ->117 0.18234  
112 ->118 0.13527

|           |          |
|-----------|----------|
| 113 ->117 | -0.12659 |
| 113 ->118 | 0.12652  |
| 114 ->118 | -0.36842 |
| 115 ->120 | 0.38755  |
| 115 ->122 | -0.10328 |
| 115 ->124 | -0.10512 |
| 115 ->125 | -0.17270 |

Excited State 19: Singlet-A 4.9316 eV 251.41 nm f=0.0071

|           |          |
|-----------|----------|
| 111 ->117 | 0.16478  |
| 112 ->117 | -0.26662 |
| 113 ->118 | 0.54926  |
| 114 ->118 | 0.21691  |

Excited State 20: Singlet-A 4.9756 eV 249.18 nm f=0.0290

|           |          |
|-----------|----------|
| 105 ->116 | 0.49437  |
| 106 ->116 | 0.20607  |
| 111 ->117 | 0.12388  |
| 112 ->118 | 0.24733  |
| 113 ->118 | -0.11487 |
| 114 ->119 | -0.11905 |
| 115 ->120 | -0.10770 |
| 115 ->124 | 0.13911  |

Excited State 21: Singlet-A 4.9865 eV 248.64 nm f=0.0033

|           |          |
|-----------|----------|
| 105 ->116 | -0.27120 |
| 106 ->116 | -0.13242 |
| 111 ->117 | 0.40249  |
| 111 ->118 | 0.14859  |
| 112 ->117 | -0.14731 |
| 112 ->118 | 0.34595  |
| 113 ->118 | -0.18410 |

Excited State 22: Singlet-A 5.0144 eV 247.26 nm f=0.0078

|           |          |
|-----------|----------|
| 111 ->117 | 0.46989  |
| 112 ->117 | 0.11445  |
| 112 ->118 | -0.43099 |

Excited State 23: Singlet-A 5.0237 eV 246.80 nm f=0.0261

|           |          |
|-----------|----------|
| 111 ->117 | -0.12332 |
| 115 ->121 | 0.64039  |
| 115 ->123 | -0.13249 |

Excited State 24: Singlet-A 5.0530 eV 245.37 nm f=0.0016

|           |          |
|-----------|----------|
| 105 ->116 | 0.11498  |
| 112 ->119 | 0.13548  |
| 113 ->119 | -0.36968 |
| 113 ->120 | 0.10670  |
| 114 ->119 | 0.46929  |
| 114 ->120 | -0.12545 |

Excited State 25: Singlet-A 5.0725 eV 244.42 nm f=0.0157

|           |         |
|-----------|---------|
| 115 ->122 | 0.59361 |
| 115 ->123 | 0.19523 |

|                             |                              |
|-----------------------------|------------------------------|
| 115 ->125                   | -0.19685                     |
| 115 ->126                   | 0.12205                      |
| Excited State 26: Singlet-A | 5.0778 eV 244.17 nm f=0.0032 |
| 110 ->117                   | 0.49344                      |
| 110 ->118                   | 0.11662                      |
| 111 ->118                   | 0.44197                      |
| Excited State 27: Singlet-A | 5.1159 eV 242.35 nm f=0.0100 |
| 115 ->124                   | 0.61066                      |
| 115 ->125                   | -0.23897                     |
| Excited State 28: Singlet-A | 5.1262 eV 241.86 nm f=0.0231 |
| 110 ->117                   | -0.41659                     |
| 110 ->118                   | -0.16230                     |
| 111 ->117                   | -0.15152                     |
| 111 ->118                   | 0.46778                      |
| 112 ->118                   | -0.14855                     |
| Excited State 29: Singlet-A | 5.1725 eV 239.70 nm f=0.0067 |
| 110 ->118                   | -0.21469                     |
| 115 ->122                   | -0.20408                     |
| 115 ->123                   | 0.53642                      |
| 115 ->126                   | 0.14340                      |
| Excited State 30: Singlet-A | 5.2046 eV 238.22 nm f=0.0077 |
| 110 ->117                   | -0.17305                     |
| 110 ->118                   | 0.56314                      |
| 115 ->122                   | -0.10029                     |
| 115 ->123                   | 0.24268                      |
| Excited State 31: Singlet-A | 5.2292 eV 237.10 nm f=0.0128 |
| 110 ->118                   | -0.16290                     |
| 110 ->121                   | 0.11386                      |
| 110 ->124                   | -0.11545                     |
| 111 ->123                   | 0.11235                      |
| 111 ->124                   | 0.16286                      |
| 112 ->124                   | -0.15930                     |
| 113 ->119                   | 0.25958                      |
| 113 ->120                   | 0.19624                      |
| 113 ->121                   | -0.14168                     |
| 113 ->123                   | 0.12450                      |
| 113 ->124                   | -0.10185                     |
| 114 ->119                   | 0.20758                      |
| 114 ->120                   | 0.14467                      |
| 114 ->121                   | -0.17015                     |
| 114 ->123                   | 0.10256                      |
| Excited State 32: Singlet-A | 5.2388 eV 236.67 nm f=0.4190 |
| 114 ->119                   | 0.12955                      |
| 115 ->121                   | 0.13279                      |
| 115 ->122                   | 0.10988                      |
| 115 ->124                   | 0.18583                      |
| 115 ->125                   | 0.44122                      |

115 ->127 0.19024  
115 ->131 0.12615

Excited State 33: Singlet-A 5.2671 eV 235.39 nm f=0.0282

110 ->117 0.13615  
110 ->118 -0.20109  
110 ->119 -0.14557  
110 ->121 0.17711  
110 ->124 0.11998  
111 ->119 -0.12983  
111 ->121 0.15219  
111 ->122 -0.15173  
111 ->123 0.13023  
112 ->118 0.10104  
112 ->119 0.20297  
112 ->120 0.12313  
112 ->121 -0.19335  
112 ->123 0.19771  
113 ->127 0.10971  
114 ->120 -0.10653  
115 ->123 0.15628

Excited State 34: Singlet-A 5.2929 eV 234.25 nm f=0.0802

109 ->117 -0.18450  
109 ->118 -0.22089  
113 ->120 -0.22275  
114 ->119 0.17279  
114 ->120 0.45030

Excited State 35: Singlet-A 5.3241 eV 232.87 nm f=0.0019

112 ->119 -0.19625  
113 ->119 0.36999  
113 ->120 -0.21348  
114 ->119 0.34512  
114 ->120 -0.27084

Excited State 36: Singlet-A 5.3311 eV 232.57 nm f=0.0094

111 ->124 -0.10791  
112 ->120 -0.16022  
112 ->124 0.10576  
113 ->119 0.14255  
113 ->120 0.47245  
114 ->120 0.25156  
114 ->121 0.10362

Excited State 37: Singlet-A 5.3626 eV 231.20 nm f=0.0001

115 ->123 -0.12035  
115 ->126 0.53587  
115 ->128 -0.29062  
115 ->129 0.20793  
115 ->130 0.12979

Excited State 38: Singlet-A 5.3749 eV 230.67 nm f=0.0338

111 ->120 0.12854



|           |         |
|-----------|---------|
| 112 ->120 | 0.45603 |
| 113 ->120 | 0.19230 |
| 115 ->127 | 0.35647 |

Excited State 39: Singlet-A 5.3905 eV 230.01 nm f=0.0239

|           |          |
|-----------|----------|
| 104 ->116 | 0.12483  |
| 109 ->119 | 0.11874  |
| 110 ->119 | -0.10182 |
| 112 ->119 | -0.26145 |
| 112 ->120 | -0.34791 |
| 113 ->119 | -0.12252 |
| 115 ->125 | -0.12144 |
| 115 ->127 | 0.34341  |
| 115 ->128 | -0.12036 |

Excited State 40: Singlet-A 5.3954 eV 229.80 nm f=0.0220

|           |          |
|-----------|----------|
| 109 ->117 | 0.15083  |
| 109 ->119 | -0.23795 |
| 110 ->119 | 0.11661  |
| 112 ->119 | 0.38668  |
| 112 ->120 | -0.20623 |
| 113 ->119 | 0.26616  |
| 115 ->127 | 0.25846  |

## TDDFT Calculation for **8a**

B3LYP

Excitation energies and oscillator strengths:

Excited State 1: Singlet-A 3.0429 eV 407.46 nm f=0.3277  
111 ->112 0.66009

This state for optimization and/or second-order correction.

Total Energy, E(RPA) = -1347.51710933

Copying the excited state density for this state as the 1-particle RhoCI density.

Excited State 2: Singlet-A 3.6424 eV 340.39 nm f=0.0048  
110 ->112 0.69717

Excited State 3: Singlet-A 3.7599 eV 329.75 nm f=0.0011  
109 ->112 0.69543

Excited State 4: Singlet-A 3.8481 eV 322.19 nm f=0.0157  
107 ->112 0.14299  
108 ->112 0.67788  
111 ->113 0.10486

Excited State 5: Singlet-A 3.8740 eV 320.04 nm f=0.0171  
106 ->112 -0.45833  
107 ->112 0.14215  
108 ->112 -0.13207  
111 ->113 0.47120

Excited State 6: Singlet-A 3.9576 eV 313.28 nm f=0.0011  
106 ->112 0.14977  
107 ->112 0.67340  
108 ->112 -0.11863

Excited State 7: Singlet-A 4.0996 eV 302.43 nm f=0.6797  
105 ->112 -0.16408  
106 ->112 0.45963  
111 ->113 0.43174

Excited State 8: Singlet-A 4.3780 eV 283.20 nm f=0.1707  
104 ->112 -0.12236  
105 ->112 0.49034  
111 ->114 0.45348

Excited State 9: Singlet-A 4.4684 eV 277.47 nm f=0.2063  
103 ->112 0.13719  
104 ->112 -0.13909  
105 ->112 -0.41210  
106 ->112 -0.10902  
106 ->113 0.16319  
111 ->114 0.46977

Excited State 10: Singlet-A 4.5943 eV 269.87 nm f=0.0421  
104 ->112 0.57917  
111 ->114 0.16493  
111 ->115 -0.31087

Excited State 11: Singlet-A 4.7193 eV 262.72 nm f=0.0040  
110 ->113 0.68962

Excited State 12: Singlet-A 4.7550 eV 260.74 nm f=0.0335  
103 ->112 -0.11682  
104 ->112 0.26694  
106 ->113 -0.14817  
110 ->113 0.12846  
111 ->114 0.10909  
111 ->115 0.54669  
111 ->116 -0.11486

Excited State 13: Singlet-A 4.8448 eV 255.91 nm f=0.0033  
109 ->113 0.69357

Excited State 14: Singlet-A 4.9014 eV 252.96 nm f=0.0068  
111 ->116 0.68378

Excited State 15: Singlet-A 4.9251 eV 251.74 nm f=0.0015  
107 ->113 0.12460  
108 ->113 0.68537

Excited State 16: Singlet-A 4.9896 eV 248.49 nm f=0.0071  
103 ->112 -0.17973  
106 ->113 0.18779  
111 ->117 0.53082  
111 ->118 -0.28346  
111 ->119 -0.10902  
111 ->120 0.11693

Excited State 17: Singlet-A 4.9940 eV 248.27 nm f=0.0249  
102 ->112 -0.17897  
103 ->112 0.54687  
106 ->113 -0.20488  
107 ->113 0.14890  
111 ->117 0.18573  
111 ->118 -0.11370

Excited State 18: Singlet-A 5.0267 eV 246.65 nm f=0.0093  
107 ->113 0.51945  
108 ->113 -0.11636  
111 ->117 0.21111  
111 ->118 0.20504  
111 ->119 0.20456  
111 ->120 0.11931

Excited State 19: Singlet-A 5.0317 eV 246.41 nm f=0.0080  
106 ->113 0.22964  
107 ->113 0.40353

111 ->117 -0.24356  
111 ->118 -0.29188  
111 ->119 -0.23752  
111 ->120 -0.14588

Excited State 20: Singlet-A 5.0725 eV 244.43 nm f=0.0068

111 ->118 -0.33139  
111 ->119 0.58898

Excited State 21: Singlet-A 5.1060 eV 242.82 nm f=0.0016

108 ->114 0.10174  
109 ->119 -0.11204  
110 ->114 0.56546  
110 ->116 -0.10824  
110 ->118 0.10318  
111 ->118 0.12960  
111 ->121 0.14721

Excited State 22: Singlet-A 5.1081 eV 242.72 nm f=0.0372

105 ->113 0.17295  
106 ->113 0.24128  
110 ->114 -0.27256  
111 ->115 0.12615  
111 ->118 0.30165  
111 ->119 0.15119  
111 ->121 0.24176  
111 ->122 0.12587  
111 ->123 -0.21105  
111 ->124 0.13274

Excited State 23: Singlet-A 5.1539 eV 240.56 nm f=0.0057

102 ->112 0.54776  
105 ->113 0.15839  
106 ->113 -0.13594  
109 ->114 -0.26168

Excited State 24: Singlet-A 5.1589 eV 240.33 nm f=0.0097

102 ->112 0.26816  
107 ->116 0.13144  
108 ->114 -0.15683  
108 ->116 -0.11040  
108 ->118 -0.13508  
109 ->114 0.49159  
109 ->116 -0.12377  
111 ->118 -0.12349

Excited State 25: Singlet-A 5.2497 eV 236.17 nm f=0.0062

107 ->116 -0.16917  
108 ->114 0.33498  
108 ->118 0.13126  
108 ->119 -0.13268  
109 ->114 0.20251  
109 ->119 -0.12498  
109 ->121 0.10398

|           |          |
|-----------|----------|
| 110 ->114 | -0.26934 |
| 110 ->115 | 0.13609  |
| 110 ->116 | -0.21038 |
| 110 ->118 | 0.15403  |
| 110 ->119 | 0.10483  |
| 111 ->120 | -0.10828 |
| 111 ->121 | 0.11313  |

Excited State 26: Singlet-A 5.2562 eV 235.88 nm f=0.0012

|           |          |
|-----------|----------|
| 111 ->117 | -0.20035 |
| 111 ->118 | -0.11945 |
| 111 ->120 | 0.63317  |

Excited State 27: Singlet-A 5.2892 eV 234.41 nm f=0.0080

|           |          |
|-----------|----------|
| 107 ->119 | 0.13153  |
| 108 ->114 | 0.41993  |
| 108 ->119 | 0.11415  |
| 109 ->114 | 0.27162  |
| 109 ->116 | 0.14537  |
| 109 ->119 | 0.16351  |
| 110 ->115 | -0.13605 |
| 110 ->116 | 0.13388  |
| 110 ->118 | -0.13297 |
| 110 ->121 | -0.13606 |
| 111 ->121 | -0.13516 |
| 111 ->123 | -0.10415 |

Excited State 28: Singlet-A 5.3043 eV 233.74 nm f=0.0128

|           |          |
|-----------|----------|
| 107 ->116 | 0.17503  |
| 107 ->119 | -0.10602 |
| 108 ->114 | 0.33795  |
| 108 ->116 | -0.15193 |
| 108 ->118 | -0.20674 |
| 109 ->114 | -0.22163 |
| 109 ->115 | 0.13092  |
| 109 ->116 | -0.19243 |
| 109 ->118 | 0.15899  |
| 109 ->119 | -0.10373 |
| 110 ->121 | 0.12797  |
| 111 ->121 | -0.24094 |

Excited State 29: Singlet-A 5.3188 eV 233.11 nm f=0.0252

|           |          |
|-----------|----------|
| 106 ->113 | -0.11471 |
| 107 ->116 | 0.12208  |
| 108 ->114 | 0.19958  |
| 108 ->118 | -0.11670 |
| 110 ->115 | -0.10353 |
| 110 ->116 | 0.12941  |
| 111 ->121 | 0.47417  |
| 111 ->122 | 0.19264  |
| 111 ->123 | 0.19310  |

Excited State 30: Singlet-A 5.3688 eV 230.94 nm f=0.1714

|           |          |
|-----------|----------|
| 103 ->112 | -0.17450 |
|-----------|----------|

|           |          |
|-----------|----------|
| 105 ->113 | 0.30720  |
| 106 ->113 | -0.27363 |
| 106 ->114 | 0.12298  |
| 107 ->114 | -0.21658 |
| 111 ->122 | 0.29391  |
| 111 ->123 | -0.10430 |
| 111 ->124 | 0.14041  |
| 111 ->127 | 0.11549  |

Excited State 31: Singlet-A 5.3748 eV 230.68 nm f=0.0250

|           |          |
|-----------|----------|
| 105 ->113 | -0.14783 |
| 106 ->113 | 0.12418  |
| 107 ->114 | 0.25665  |
| 111 ->121 | -0.21665 |
| 111 ->122 | 0.48170  |
| 111 ->124 | 0.12650  |
| 111 ->125 | 0.17417  |
| 111 ->126 | 0.13433  |

Excited State 32: Singlet-A 5.3784 eV 230.52 nm f=0.0995

|           |          |
|-----------|----------|
| 104 ->113 | 0.10406  |
| 104 ->115 | -0.10531 |
| 105 ->113 | 0.15426  |
| 106 ->113 | -0.14587 |
| 107 ->114 | 0.55665  |
| 111 ->122 | -0.11008 |
| 111 ->123 | -0.18483 |

Excited State 33: Singlet-A 5.4252 eV 228.53 nm f=0.0344

|           |          |
|-----------|----------|
| 100 ->112 | -0.21050 |
| 101 ->112 | -0.32417 |
| 104 ->115 | 0.11411  |
| 105 ->113 | 0.14448  |
| 106 ->114 | 0.36519  |
| 107 ->114 | 0.17569  |
| 111 ->123 | 0.29201  |
| 111 ->124 | -0.10707 |

Excited State 34: Singlet-A 5.4355 eV 228.10 nm f=0.0026

|           |          |
|-----------|----------|
| 100 ->112 | 0.26364  |
| 101 ->112 | 0.36685  |
| 102 ->112 | -0.11907 |
| 104 ->113 | -0.12543 |
| 104 ->115 | 0.11289  |
| 106 ->114 | 0.39208  |
| 107 ->114 | 0.10474  |
| 110 ->115 | -0.13560 |

Excited State 35: Singlet-A 5.4580 eV 227.16 nm f=0.0053

|           |          |
|-----------|----------|
| 109 ->115 | -0.10431 |
| 110 ->115 | 0.63868  |
| 110 ->116 | 0.15791  |

Excited State 36: Singlet-A 5.5056 eV 225.20 nm f=0.0027

|           |          |
|-----------|----------|
| 105 ->113 | 0.12068  |
| 109 ->115 | 0.10627  |
| 111 ->122 | -0.18337 |
| 111 ->123 | 0.27170  |
| 111 ->124 | 0.47827  |
| 111 ->125 | 0.22241  |
| 111 ->126 | -0.13210 |

Excited State 37: Singlet-A 5.5114 eV 224.96 nm f=0.0143

|           |          |
|-----------|----------|
| 100 ->112 | 0.14553  |
| 101 ->112 | 0.13979  |
| 102 ->112 | -0.11424 |
| 105 ->113 | 0.25391  |
| 108 ->115 | -0.10662 |
| 109 ->115 | 0.38020  |
| 111 ->123 | 0.18378  |
| 111 ->124 | -0.26419 |
| 111 ->125 | -0.10534 |

Excited State 38: Singlet-A 5.5302 eV 224.20 nm f=0.0241

|           |          |
|-----------|----------|
| 105 ->113 | -0.20295 |
| 106 ->114 | 0.17906  |
| 108 ->115 | -0.10890 |
| 109 ->115 | 0.49956  |
| 109 ->116 | 0.11060  |
| 110 ->116 | 0.17131  |
| 111 ->123 | -0.15552 |

Excited State 39: Singlet-A 5.5715 eV 222.53 nm f=0.0072

|           |          |
|-----------|----------|
| 107 ->116 | -0.12189 |
| 108 ->115 | 0.15123  |
| 109 ->116 | 0.11344  |
| 110 ->116 | 0.46038  |
| 110 ->117 | -0.10392 |
| 110 ->118 | 0.29833  |
| 111 ->123 | 0.16426  |
| 111 ->125 | -0.16465 |

Excited State 40: Singlet-A 5.5816 eV 222.13 nm f=0.0187

|           |          |
|-----------|----------|
| 105 ->113 | 0.11904  |
| 110 ->116 | 0.11150  |
| 111 ->123 | -0.13819 |
| 111 ->124 | -0.26424 |
| 111 ->125 | 0.52472  |
| 111 ->126 | -0.14561 |
| 111 ->127 | 0.11266  |

## TDDFT Calculation for **8b**

B3LYP

Excitation energies and oscillator strengths:

Excited State 1: Singlet-A 2.8948 eV 428.30 nm f=0.3478  
115 ->116 0.65968

This state for optimization and/or second-order correction.

Total Energy, E(RPA) = -1670.49812825

Copying the excited state density for this state as the 1-particle RhoCI density.

Excited State 2: Singlet-A 3.4868 eV 355.58 nm f=0.0036  
114 ->116 0.69824

Excited State 3: Singlet-A 3.5907 eV 345.29 nm f=0.0006  
113 ->116 0.69787

Excited State 4: Singlet-A 3.6924 eV 335.78 nm f=0.0051  
111 ->116 0.12839  
112 ->116 0.68894

Excited State 5: Singlet-A 3.7657 eV 329.25 nm f=0.1186  
110 ->116 0.51872  
111 ->116 -0.30319  
115 ->117 0.33654

Excited State 6: Singlet-A 3.8082 eV 325.57 nm f=0.0159  
110 ->116 0.27638  
111 ->116 0.62142  
112 ->116 -0.13398  
115 ->117 0.12222

Excited State 7: Singlet-A 4.0037 eV 309.68 nm f=0.4863  
108 ->116 -0.17969  
110 ->116 -0.32550  
115 ->117 0.54458

Excited State 8: Singlet-A 4.0603 eV 305.36 nm f=0.0454  
109 ->116 0.64777  
115 ->118 0.21162

Excited State 9: Singlet-A 4.3080 eV 287.80 nm f=0.1428  
107 ->116 -0.10749  
108 ->116 0.53609  
110 ->117 -0.11348  
115 ->117 0.12132  
115 ->118 0.36654

Excited State 10: Singlet-A 4.3828 eV 282.89 nm f=0.1681  
108 ->116 -0.35714  
109 ->116 -0.17536  
115 ->118 0.54373



Excited State 11: Singlet-A 4.5201 eV 274.29 nm f=0.0052  
110 ->117 0.10855  
115 ->119 0.64061  
115 ->120 0.19476

Excited State 12: Singlet-A 4.6409 eV 267.15 nm f=0.0067  
107 ->116 -0.19386  
110 ->117 -0.21057  
114 ->117 0.21380  
115 ->120 0.55768

Excited State 13: Singlet-A 4.6744 eV 265.24 nm f=0.0008  
114 ->117 0.66987  
115 ->120 -0.18067

Excited State 14: Singlet-A 4.7821 eV 259.27 nm f=0.0009  
113 ->117 0.68486

Excited State 15: Singlet-A 4.8247 eV 256.98 nm f=0.0153  
106 ->116 0.23713  
107 ->116 0.56639  
110 ->117 -0.23430  
113 ->117 0.10192

Excited State 16: Singlet-A 4.8748 eV 254.34 nm f=0.0015  
111 ->117 0.13684  
112 ->117 0.67853

Excited State 17: Singlet-A 4.9006 eV 253.00 nm f=0.0001  
115 ->121 0.62842  
115 ->122 0.15773

Excited State 18: Singlet-A 4.9311 eV 251.43 nm f=0.0455  
110 ->117 0.22466  
115 ->119 -0.12703  
115 ->120 0.20452  
115 ->121 -0.25088  
115 ->122 0.34065  
115 ->123 -0.16095  
115 ->124 0.31438  
115 ->125 0.15056

Excited State 19: Singlet-A 4.9689 eV 249.52 nm f=0.0118  
105 ->116 -0.13953  
106 ->116 0.51730  
107 ->116 -0.15200  
109 ->117 -0.10554  
111 ->117 -0.34147

Excited State 20: Singlet-A 4.9897 eV 248.48 nm f=0.0036  
106 ->116 0.27384  
107 ->116 -0.12581  
110 ->117 0.12925  
111 ->117 0.57529

|                             |           |           |          |  |
|-----------------------------|-----------|-----------|----------|--|
| 112 ->117                   | -0.14369  |           |          |  |
| Excited State 21: Singlet-A | 5.0015 eV | 247.89 nm | f=0.0048 |  |
| 112 ->118                   | -0.13051  |           |          |  |
| 113 ->118                   | -0.17050  |           |          |  |
| 114 ->118                   | 0.58293   |           |          |  |
| 115 ->123                   | -0.21039  |           |          |  |
| 115 ->124                   | -0.12939  |           |          |  |
| Excited State 22: Singlet-A | 5.0089 eV | 247.53 nm | f=0.0050 |  |
| 114 ->118                   | 0.26724   |           |          |  |
| 115 ->122                   | -0.11026  |           |          |  |
| 115 ->123                   | 0.55061   |           |          |  |
| 115 ->124                   | 0.24304   |           |          |  |
| Excited State 23: Singlet-A | 5.0187 eV | 247.04 nm | f=0.0179 |  |
| 112 ->118                   | 0.13166   |           |          |  |
| 113 ->118                   | 0.58955   |           |          |  |
| 114 ->118                   | 0.19893   |           |          |  |
| 115 ->123                   | -0.13960  |           |          |  |
| 115 ->124                   | 0.11598   |           |          |  |
| Excited State 24: Singlet-A | 5.0564 eV | 245.20 nm | f=0.0044 |  |
| 113 ->118                   | -0.16256  |           |          |  |
| 115 ->122                   | -0.39689  |           |          |  |
| 115 ->123                   | -0.25828  |           |          |  |
| 115 ->124                   | 0.45367   |           |          |  |
| Excited State 25: Singlet-A | 5.0776 eV | 244.18 nm | f=0.0366 |  |
| 110 ->117                   | 0.19219   |           |          |  |
| 115 ->122                   | -0.34047  |           |          |  |
| 115 ->124                   | -0.23519  |           |          |  |
| 115 ->125                   | 0.46592   |           |          |  |
| Excited State 26: Singlet-A | 5.1506 eV | 240.72 nm | f=0.0072 |  |
| 112 ->118                   | 0.64702   |           |          |  |
| 113 ->118                   | -0.18739  |           |          |  |
| 114 ->118                   | 0.11143   |           |          |  |
| Excited State 27: Singlet-A | 5.1957 eV | 238.63 nm | f=0.0359 |  |
| 104 ->116                   | 0.18412   |           |          |  |
| 105 ->116                   | 0.57673   |           |          |  |
| 106 ->116                   | 0.13073   |           |          |  |
| 109 ->117                   | -0.16668  |           |          |  |
| 115 ->125                   | 0.17274   |           |          |  |
| Excited State 28: Singlet-A | 5.2172 eV | 237.65 nm | f=0.0202 |  |
| 105 ->116                   | 0.18994   |           |          |  |
| 106 ->116                   | 0.14452   |           |          |  |
| 109 ->117                   | 0.36826   |           |          |  |
| 110 ->118                   | -0.22456  |           |          |  |
| 111 ->118                   | 0.37972   |           |          |  |
| 115 ->125                   | -0.14582  |           |          |  |

Excited State 29: Singlet-A 5.2411 eV 236.56 nm f=0.0158

|           |          |
|-----------|----------|
| 109 ->117 | -0.37059 |
| 110 ->118 | 0.12166  |
| 111 ->118 | 0.42901  |
| 111 ->121 | 0.12322  |
| 112 ->122 | 0.10661  |
| 113 ->118 | -0.13653 |
| 113 ->122 | 0.10619  |
| 115 ->125 | 0.11559  |

Excited State 30: Singlet-A 5.2515 eV 236.09 nm f=0.2226

|           |          |
|-----------|----------|
| 108 ->117 | 0.10819  |
| 109 ->119 | -0.10213 |
| 110 ->117 | 0.30674  |
| 110 ->118 | 0.27576  |
| 110 ->119 | -0.12069 |
| 112 ->124 | -0.10437 |
| 115 ->125 | -0.23486 |
| 115 ->127 | 0.11533  |
| 115 ->128 | -0.16307 |

Excited State 31: Singlet-A 5.2725 eV 235.15 nm f=0.0102

|           |          |
|-----------|----------|
| 111 ->118 | 0.10810  |
| 111 ->121 | -0.12594 |
| 111 ->124 | -0.15528 |
| 112 ->121 | 0.14349  |
| 112 ->122 | -0.18875 |
| 113 ->118 | 0.13151  |
| 113 ->120 | 0.10860  |
| 113 ->121 | -0.22318 |
| 113 ->123 | -0.11467 |
| 113 ->124 | 0.23648  |
| 114 ->118 | 0.10444  |
| 114 ->121 | -0.14915 |
| 114 ->122 | -0.18398 |
| 114 ->125 | 0.18703  |
| 114 ->127 | -0.10108 |
| 114 ->128 | 0.17546  |

Excited State 32: Singlet-A 5.2767 eV 234.96 nm f=0.1102

|           |          |
|-----------|----------|
| 108 ->117 | 0.15049  |
| 110 ->117 | 0.18066  |
| 110 ->118 | 0.15542  |
| 111 ->118 | 0.31584  |
| 111 ->121 | -0.16831 |
| 112 ->118 | 0.14827  |
| 112 ->122 | -0.10895 |
| 112 ->124 | 0.16083  |
| 113 ->122 | -0.15055 |
| 113 ->128 | -0.13948 |
| 114 ->119 | -0.12189 |
| 114 ->121 | 0.18163  |
| 115 ->125 | -0.10883 |

Excited State 33: Singlet-A 5.3057 eV 233.68 nm f=0.0113  
109 ->119 -0.10502  
110 ->118 0.10324  
115 ->126 0.49130  
115 ->127 0.35194  
115 ->128 0.16086

Excited State 34: Singlet-A 5.3121 eV 233.40 nm f=0.0029  
109 ->117 0.22483  
109 ->119 -0.17566  
110 ->118 0.22335  
114 ->119 0.17994  
115 ->126 -0.11072  
115 ->127 -0.26746  
115 ->128 0.41798

Excited State 35: Singlet-A 5.3250 eV 232.83 nm f=0.0712  
108 ->117 0.30697  
109 ->117 -0.15752  
109 ->118 0.10985  
109 ->119 0.12357  
110 ->117 0.12425  
110 ->118 -0.26708  
114 ->119 -0.11231  
115 ->126 0.13366  
115 ->128 0.32484  
115 ->132 0.10203

Excited State 36: Singlet-A 5.3500 eV 231.75 nm f=0.0022  
115 ->123 -0.10329  
115 ->126 -0.38071  
115 ->127 0.46845  
115 ->128 0.22213  
115 ->130 0.12615  
115 ->131 -0.16997

Excited State 37: Singlet-A 5.3525 eV 231.64 nm f=0.0007  
109 ->117 -0.11696  
110 ->118 -0.14782  
114 ->119 0.62687

Excited State 38: Singlet-A 5.4196 eV 228.77 nm f=0.0327  
108 ->117 0.18843  
109 ->119 -0.14336  
109 ->120 -0.11632  
113 ->119 0.46202  
114 ->120 0.32593  
115 ->128 -0.13695

Excited State 39: Singlet-A 5.4253 eV 228.53 nm f=0.0156  
108 ->117 -0.25466  
109 ->119 0.13456  
110 ->118 -0.11534  
110 ->119 0.14477

|           |          |
|-----------|----------|
| 113 ->119 | 0.41712  |
| 113 ->120 | -0.19144 |
| 114 ->120 | -0.15028 |
| 115 ->125 | -0.14811 |
| 115 ->128 | 0.18848  |

Excited State 40: Singlet-A 5.4531 eV 227.37 nm f=0.0392

|           |          |
|-----------|----------|
| 108 ->117 | -0.23051 |
| 113 ->119 | -0.12085 |
| 113 ->120 | 0.10561  |
| 114 ->120 | 0.53354  |
| 114 ->122 | 0.12641  |
| 115 ->125 | -0.11991 |
| 115 ->128 | 0.12640  |
| 115 ->132 | -0.11602 |

## VModes Analysis for **5**

| Number | Orbital | Energy, eV | Group Number |              |             |       |             | Total |
|--------|---------|------------|--------------|--------------|-------------|-------|-------------|-------|
|        | Index   |            | Azole Ligand | Azole Hetero | Aryl Ligand | Boron | Biphenyl Ac |       |
| 79     | (A)--O  | -10.454    | 36.5         | 3.1          | 39.3        | 2.4   | 18.7        | 100   |
| 80     | (A)--O  | -10.358    | 20.3         | 2.2          | 36.4        | 2.3   | 38.7        | 100   |
| 81     | (A)--O  | -10.288    | 42.7         | 4            | 39.2        | 1.9   | 12.3        | 100   |
| 82     | (A)--O  | -10.081    | 40.2         | 12.1         | 24.5        | 1.5   | 21.6        | 100   |
| 83     | (A)--O  | -9.581     | 4.6          | 0.1          | 47.2        | 1.3   | 46.8        | 100   |
| 84     | (A)--O  | -9.479     | 6.1          | 0.5          | 8.6         | 0.7   | 84.1        | 100   |
| 85     | (A)--O  | -9.412     | 1.9          | 0            | 17.2        | 0.7   | 80.2        | 100   |
| 86     | (A)--O  | -8.907     | 1            | 0.1          | 8.9         | 2.3   | 87.8        | 100   |
| 87     | (A)--O  | -8.883     | 1.4          | 0.1          | 11          | 0.9   | 86.6        | 100   |
| 88     | (A)--O  | -8.627     | 2.4          | 0.2          | 41.9        | 7.8   | 47.8        | 100   |
| 89     | (A)--O  | -8.459     | 14           | 0.9          | 43.3        | 6.3   | 35.5        | 100   |
| 90     | (A)--O  | -8.126     | 50.2         | 0.4          | 46.3        | 0.3   | 2.9         | 100   |
| 91     | (A)--O  | -7.802     | 20.7         | 0.1          | 12.3        | 12.3  | 54.7        | 100   |
| 92     | (A)--O  | -7.464     | 67           | 11.7         | 5.9         | 2.2   | 13.2        | 100   |
| 93     | (A)--O  | -7.016     | 42           | 0.4          | 56.1        | 0.2   | 1.3         | 100   |
| 94     | (A)--O  | -6.53      | 3.3          | 0            | 1.2         | 0.6   | 94.9        | 100   |
| 95     | (A)--O  | -6.448     | 3.6          | 0.1          | 2.6         | 0.3   | 93.4        | 100   |
| 96     | (A)--O  | -6.399     | 3.4          | 0.2          | 5.2         | 0.5   | 90.8        | 100   |
| 97     | (A)--O  | -6.269     | 2            | 0            | 6.5         | 1.3   | 90.1        | 100   |
| 98     | (A)--O  | -6.107     | 15.9         | 0.5          | 59.4        | 1.3   | 22.9        | 100   |
| 99     | (A)--V  | -2.247     | 49.4         | 6.1          | 39.4        | 1.3   | 3.7         | 100   |
| 100    | (A)--V  | -0.799     | 80.6         | 3            | 9.6         | 2.4   | 4.5         | 100   |
| 101    | (A)--V  | -0.523     | 86           | 1            | 10.1        | 0.8   | 2.1         | 100   |
| 102    | (A)--V  | -0.29      | 5.6          | 0.5          | 82          | 2.2   | 9.6         | 100   |
| 103    | (A)--V  | -0.002     | 14.6         | 0.3          | 11.3        | 4.9   | 68.9        | 100   |
| 104    | (A)--V  | 0.134      | 14.4         | 0.6          | 10.1        | 1.1   | 73.7        | 100   |
| 105    | (A)--V  | 0.188      | 2.6          | 0.1          | 5.1         | 1     | 91.3        | 100   |
| 106    | (A)--V  | 0.399      | 4.6          | 0.1          | 2.8         | 1.5   | 91          | 100   |
| 107    | (A)--V  | 0.787      | 31.8         | 4            | 49.6        | 5.2   | 9.4         | 100   |
| 108    | (A)--V  | 0.97       | 95.6         | 0.3          | 0.9         | 1.2   | 2           | 100   |
| 109    | (A)--V  | 1.176      | 12.5         | 1.2          | 82.1        | 0.7   | 3.6         | 100   |
| 110    | (A)--V  | 1.539      | 11.2         | 0.5          | 4.7         | 10.7  | 72.9        | 100   |
| 111    | (A)--V  | 1.724      | 14.3         | 0.5          | 3.4         | 0.4   | 81.3        | 100   |
| 112    | (A)--V  | 1.864      | 56.4         | 2.1          | 34.4        | 0.6   | 6.6         | 100   |
| 113    | (A)--V  | 2.019      | 43.3         | 1.2          | 40.4        | 0.8   | 14.3        | 100   |
| 114    | (A)--V  | 2.259      | 23.1         | 4.9          | 44.1        | 1.3   | 26.6        | 100   |
| 115    | (A)--V  | 2.447      | 23.3         | 0            | 7.8         | 0.7   | 68.2        | 100   |
| 116    | (A)--V  | 2.457      | 7.2          | 0.1          | 22          | 0.4   | 70.3        | 100   |
| 117    | (A)--V  | 2.726      | 67.8         | 0            | 8.6         | 1.1   | 22.4        | 100   |
| 118    | (A)--V  | 2.754      | 17.4         | 0.8          | 36.5        | 6.2   | 39.1        | 100   |
| 118    | (A)--V  | 2.754      | 17.4         | 0.8          | 36.5        | 6.2   | 39.1        | 100   |

## VModes Analysis for **6**

| Number | Orbital | Energy, eV | Group       |              |             |       | Total |             |
|--------|---------|------------|-------------|--------------|-------------|-------|-------|-------------|
|        | Index   |            | Azole Ligan | Azole Hetero | Aryl Ligand | Boron |       | Biphenyl Ac |
| 83     | (A)--O  | -10.374    | 16.7        | 9.4          | 35.4        | 2.5   | 36    | 100         |
| 84     | (A)--O  | -10.204    | 57.2        | 3.2          | 32.1        | 1.3   | 6.2   | 100         |
| 85     | (A)--O  | -10.044    | 54.5        | 28.5         | 12.9        | 0.4   | 3.7   | 100         |
| 86     | (A)--O  | -9.559     | 5.6         | 0.7          | 46.6        | 1.3   | 45.9  | 100         |
| 87     | (A)--O  | -9.448     | 15.4        | 4.5          | 2.9         | 0.9   | 76.3  | 100         |
| 88     | (A)--O  | -9.405     | 2.3         | 0.2          | 17.6        | 0.8   | 79    | 100         |
| 89     | (A)--O  | -9.136     | 35.5        | 46           | 8.8         | 1.2   | 8.6   | 100         |
| 90     | (A)--O  | -8.896     | 1.5         | 0.9          | 4.4         | 2.2   | 91    | 100         |
| 91     | (A)--O  | -8.862     | 1.4         | 0.3          | 10.5        | 0.6   | 87.2  | 100         |
| 92     | (A)--O  | -8.616     | 2.7         | 0.5          | 32.8        | 9.3   | 54.7  | 100         |
| 93     | (A)--O  | -8.346     | 15.8        | 3.5          | 49.6        | 5     | 26.1  | 100         |
| 94     | (A)--O  | -8.08      | 53.1        | 1            | 42.6        | 0.3   | 3     | 100         |
| 95     | (A)--O  | -7.744     | 13.1        | 0.1          | 13.3        | 13.6  | 59.9  | 100         |
| 96     | (A)--O  | -7.138     | 57.2        | 26           | 6.2         | 1.1   | 9.5   | 100         |
| 97     | (A)--O  | -6.97      | 36.4        | 7.2          | 55          | 0.3   | 1.1   | 100         |
| 98     | (A)--O  | -6.52      | 3.5         | 0.2          | 1.9         | 0.5   | 93.9  | 100         |
| 99     | (A)--O  | -6.439     | 3.4         | 0.1          | 3.2         | 0.2   | 93.1  | 100         |
| 100    | (A)--O  | -6.362     | 4.5         | 0.3          | 4.5         | 0.2   | 90.4  | 100         |
| 101    | (A)--O  | -6.278     | 1.1         | 0.1          | 5.1         | 1.1   | 92.6  | 100         |
| 102    | (A)--O  | -6.088     | 16.4        | 1.5          | 60.6        | 1.3   | 20.2  | 100         |
| 103    | (A)--V  | -2.418     | 54          | 11.9         | 29          | 0.9   | 4.3   | 100         |
| 104    | (A)--V  | -0.949     | 84.9        | 6            | 2.7         | 2.8   | 3.6   | 100         |
| 105    | (A)--V  | -0.625     | 65.2        | 24.9         | 8.4         | 0.4   | 1.1   | 100         |
| 106    | (A)--V  | -0.485     | 79          | 7.4          | 10.4        | 0.9   | 2.2   | 100         |
| 107    | (A)--V  | -0.29      | 16.9        | 6.5          | 61.5        | 3.2   | 11.8  | 100         |
| 108    | (A)--V  | 0.032      | 21.7        | 4.8          | 14.1        | 2.8   | 56.5  | 100         |
| 109    | (A)--V  | 0.142      | 14.3        | 0.7          | 9.6         | 0.4   | 75    | 100         |
| 110    | (A)--V  | 0.199      | 5           | 0.4          | 12.1        | 1.2   | 81.3  | 100         |
| 111    | (A)--V  | 0.374      | 12.8        | 3.4          | 18.6        | 4.2   | 61    | 100         |
| 112    | (A)--V  | 0.496      | 26.5        | 5            | 35.9        | 4.3   | 28.2  | 100         |
| 113    | (A)--V  | 0.998      | 22.8        | 26.8         | 48.7        | 0.4   | 1.2   | 100         |
| 114    | (A)--V  | 1.223      | 79.3        | 1.6          | 10.2        | 3.6   | 5.3   | 100         |
| 115    | (A)--V  | 1.521      | 22.4        | 13.7         | 30.6        | 6.1   | 27.2  | 100         |
| 116    | (A)--V  | 1.61       | 10.2        | 8            | 28.8        | 5.1   | 48    | 100         |
| 117    | (A)--V  | 1.743      | 3.6         | 0.4          | 3.3         | 0.7   | 92    | 100         |
| 118    | (A)--V  | 2.066      | 86.7        | 0.6          | 3.2         | 0.4   | 9     | 100         |
| 119    | (A)--V  | 2.157      | 12.4        | 3.2          | 71.3        | 0.2   | 12.9  | 100         |
| 120    | (A)--V  | 2.43       | 9.9         | 0.7          | 9.9         | 2     | 77.5  | 100         |
| 121    | (A)--V  | 2.491      | 12.2        | 0.4          | 19.9        | 0.7   | 66.8  | 100         |
| 122    | (A)--V  | 2.659      | 8.6         | 1.2          | 21.7        | 9     | 59.4  | 100         |

### VModes Analysis for **7a**

| Number | Orbital | Energy, eV | Group       |             |             |       | Total |             |
|--------|---------|------------|-------------|-------------|-------------|-------|-------|-------------|
|        | Index   |            | Azole Ligan | Azole Heter | Aryl Ligand | Boron |       | Biphenyl Ac |
| 92     | (A)--O  | -10.047    | 9.3         | 6.6         | 21.9        | 1.5   | 60.7  | 100         |
| 93     | (A)--O  | -9.978     | 4.2         | 0.1         | 88.7        | 0.2   | 6.9   | 100         |
| 94     | (A)--O  | -9.59      | 1.9         | 0.1         | 91.7        | 0.3   | 6     | 100         |
| 95     | (A)--O  | -9.46      | 6.8         | 0.3         | 10.7        | 0.3   | 81.9  | 100         |
| 96     | (A)--O  | -9.427     | 1.7         | 0.3         | 5.7         | 0.2   | 92.1  | 100         |
| 97     | (A)--O  | -9.07      | 11.4        | 0.7         | 59.1        | 2.8   | 26    | 100         |
| 98     | (A)--O  | -8.885     | 1.1         | 0           | 8.2         | 2.3   | 88.5  | 100         |
| 99     | (A)--O  | -8.839     | 1.5         | 0           | 12.1        | 0.5   | 85.9  | 100         |
| 100    | (A)--O  | -8.598     | 1.9         | 0.1         | 31          | 9.5   | 57.5  | 100         |
| 101    | (A)--O  | -8.414     | 14.4        | 0.7         | 59.2        | 4.3   | 21.4  | 100         |
| 102    | (A)--O  | -8.092     | 13.5        | 0.3         | 61.4        | 5.1   | 19.7  | 100         |
| 103    | (A)--O  | -7.744     | 50.3        | 1.2         | 31.6        | 2.7   | 14.2  | 100         |
| 104    | (A)--O  | -7.648     | 43.5        | 0.5         | 32.4        | 4     | 19.5  | 100         |
| 105    | (A)--O  | -7.461     | 45.4        | 9.3         | 15.7        | 4.2   | 25.4  | 100         |
| 106    | (A)--O  | -6.514     | 4.6         | 0.1         | 7.2         | 0.6   | 87.5  | 100         |
| 107    | (A)--O  | -6.504     | 29.3        | 0.8         | 51.4        | 1     | 17.5  | 100         |
| 108    | (A)--O  | -6.426     | 2.4         | 0.1         | 1.7         | 0.3   | 95.5  | 100         |
| 109    | (A)--O  | -6.375     | 6.3         | 0.2         | 4.9         | 0.4   | 88.3  | 100         |
| 110    | (A)--O  | -6.24      | 1.2         | 0           | 3.9         | 1     | 93.9  | 100         |
| 111    | (A)--O  | -5.827     | 2.6         | 0           | 84.3        | 1.2   | 11.9  | 100         |
| 112    | (A)--V  | -2.497     | 42.2        | 5.6         | 48.2        | 1.1   | 2.9   | 100         |
| 113    | (A)--V  | -1.064     | 44.3        | 0           | 52.7        | 0.2   | 2.8   | 100         |
| 114    | (A)--V  | -0.755     | 59          | 4.2         | 28.2        | 3.2   | 5.4   | 100         |
| 115    | (A)--V  | -0.577     | 72.8        | 0.8         | 23.9        | 0.8   | 1.8   | 100         |
| 116    | (A)--V  | 0.003      | 15.5        | 0.4         | 12.1        | 4.5   | 67.5  | 100         |
| 117    | (A)--V  | 0.086      | 18.2        | 0.8         | 44.7        | 3.2   | 33    | 100         |
| 118    | (A)--V  | 0.193      | 3.8         | 0           | 18.5        | 0.9   | 76.8  | 100         |
| 119    | (A)--V  | 0.195      | 15.2        | 0.9         | 30.1        | 0.8   | 53.1  | 100         |
| 120    | (A)--V  | 0.405      | 4.4         | 0.2         | 7.1         | 1.6   | 86.7  | 100         |
| 121    | (A)--V  | 0.614      | 19.3        | 2.1         | 66          | 2.1   | 10.5  | 100         |
| 122    | (A)--V  | 0.94       | 95.4        | 0.3         | 1.4         | 1.1   | 1.8   | 100         |
| 123    | (A)--V  | 1.178      | 6.2         | 0.5         | 92.5        | 0.1   | 0.7   | 100         |
| 124    | (A)--V  | 1.525      | 9.8         | 2.6         | 24.4        | 7.9   | 55.3  | 100         |
| 125    | (A)--V  | 1.537      | 11.6        | 0.5         | 81.1        | 1.6   | 5.2   | 100         |
| 126    | (A)--V  | 1.719      | 18.7        | 0.5         | 13.1        | 0.4   | 67.4  | 100         |
| 127    | (A)--V  | 1.89       | 57.1        | 1.3         | 27.2        | 0.3   | 14.1  | 100         |
| 128    | (A)--V  | 2.011      | 37.9        | 2.9         | 39.5        | 0.9   | 18.9  | 100         |
| 129    | (A)--V  | 2.307      | 19.6        | 1.7         | 35.8        | 0.8   | 42.2  | 100         |
| 130    | (A)--V  | 2.461      | 20.3        | 0.2         | 3.6         | 0.5   | 75.4  | 100         |
| 131    | (A)--V  | 2.588      | 24.5        | 0.6         | 48.4        | 2.2   | 24.3  | 100         |



## VModes Analysis for **7b**

| Number | Orbital | Energy, eV | Group        |              |             |       | Total |             |
|--------|---------|------------|--------------|--------------|-------------|-------|-------|-------------|
|        | Index   |            | Azole Ligand | Azole Hetero | Aryl Ligand | Boron |       | Biphenyl Ac |
| 96     | (A)--O  | -9.949     | 8.4          | 0.8          | 84.7        | 0.3   | 5.8   | 100         |
| 97     | (A)--O  | -9.564     | 1.8          | 1.1          | 92          | 0.3   | 4.8   | 100         |
| 98     | (A)--O  | -9.438     | 15.3         | 7.7          | 7.2         | 1.1   | 68.8  | 100         |
| 99     | (A)--O  | -9.426     | 1.9          | 0.1          | 3           | 0.2   | 94.8  | 100         |
| 100    | (A)--O  | -9.223     | 33.3         | 31.9         | 11.4        | 1.5   | 21.9  | 100         |
| 101    | (A)--O  | -8.966     | 15.6         | 15.9         | 44.8        | 1.9   | 21.9  | 100         |
| 102    | (A)--O  | -8.88      | 1.2          | 0.1          | 7.2         | 2.2   | 89.3  | 100         |
| 103    | (A)--O  | -8.815     | 2.8          | 0.9          | 15.6        | 0.3   | 80.4  | 100         |
| 104    | (A)--O  | -8.597     | 2.4          | 0.3          | 26.7        | 10.2  | 60.3  | 100         |
| 105    | (A)--O  | -8.318     | 15.4         | 2.5          | 63.2        | 3.6   | 15.2  | 100         |
| 106    | (A)--O  | -8.032     | 13.1         | 1.4          | 60          | 5.1   | 20.4  | 100         |
| 107    | (A)--O  | -7.695     | 44.3         | 0.7          | 39.9        | 2.6   | 12.6  | 100         |
| 108    | (A)--O  | -7.591     | 24.8         | 0.1          | 30.3        | 7.3   | 37.4  | 100         |
| 109    | (A)--O  | -7.166     | 50.6         | 26.8         | 9           | 1.4   | 12.2  | 100         |
| 110    | (A)--O  | -6.513     | 6            | 0.8          | 10.9        | 0.6   | 81.7  | 100         |
| 111    | (A)--O  | -6.47      | 24           | 3            | 46.3        | 0.6   | 26.1  | 100         |
| 112    | (A)--O  | -6.412     | 4.7          | 0.8          | 8.9         | 0.4   | 85.2  | 100         |
| 113    | (A)--O  | -6.341     | 7.8          | 0.3          | 4.9         | 0.2   | 86.8  | 100         |
| 114    | (A)--O  | -6.259     | 1.2          | 0            | 3.9         | 0.8   | 94.1  | 100         |
| 115    | (A)--O  | -5.813     | 2.9          | 0.1          | 85          | 1.4   | 10.6  | 100         |
| 116    | (A)--V  | -2.622     | 49           | 11.1         | 35.8        | 0.4   | 3.6   | 100         |
| 117    | (A)--V  | -1.068     | 43.4         | 2.4          | 51.9        | 0.2   | 2.2   | 100         |
| 118    | (A)--V  | -0.958     | 67.3         | 7.5          | 17.8        | 3.4   | 4     | 100         |
| 119    | (A)--V  | -0.629     | 62.3         | 24.9         | 10.8        | 0.6   | 1.4   | 100         |
| 120    | (A)--V  | -0.549     | 64.4         | 3            | 29.2        | 1.3   | 2.1   | 100         |
| 121    | (A)--V  | -0.045     | 29           | 5.3          | 41.6        | 2.9   | 21.2  | 100         |
| 122    | (A)--V  | 0.056      | 22.5         | 2.5          | 19.9        | 6.5   | 48.6  | 100         |
| 123    | (A)--V  | 0.153      | 14           | 0.8          | 14.4        | 0.3   | 70.5  | 100         |
| 124    | (A)--V  | 0.194      | 3.7          | 1            | 18.7        | 0.7   | 75.9  | 100         |
| 125    | (A)--V  | 0.393      | 5.6          | 0.3          | 20.4        | 1     | 72.7  | 100         |
| 126    | (A)--V  | 0.537      | 13           | 2.1          | 64.8        | 1.2   | 18.9  | 100         |
| 127    | (A)--V  | 0.979      | 22.7         | 26.3         | 49.2        | 0.7   | 1.1   | 100         |
| 128    | (A)--V  | 1.201      | 71.9         | 1.4          | 21.5        | 2.1   | 3.1   | 100         |
| 129    | (A)--V  | 1.334      | 16           | 11.6         | 71.6        | 0.3   | 0.5   | 100         |
| 130    | (A)--V  | 1.569      | 9.6          | 0.2          | 10.8        | 11.6  | 67.8  | 100         |
| 131    | (A)--V  | 1.73       | 6.4          | 1.1          | 37.9        | 0.5   | 54.1  | 100         |
| 132    | (A)--V  | 1.786      | 6.1          | 3.3          | 74.3        | 0.1   | 16.2  | 100         |
| 133    | (A)--V  | 2.044      | 87.1         | 0.4          | 2.2         | 0.5   | 9.7   | 100         |
| 134    | (A)--V  | 2.348      | 11.4         | 2.7          | 61.3        | 0.7   | 23.9  | 100         |
| 135    | (A)--V  | 2.412      | 9.7          | 2.7          | 13.8        | 2.7   | 71.2  | 100         |

### VModes Analysis for **8a**

| Number | Orbital | Energy, eV | Group       |             |             |       | Total |             |
|--------|---------|------------|-------------|-------------|-------------|-------|-------|-------------|
|        | Index   |            | Azole Ligan | Azole Heter | Aryl Ligand | Boron |       | Biphenyl Ac |
| 92     | (A)--O  | -10.014    | 12.1        | 8.6         | 22.6        | 1.1   | 55.7  | 100         |
| 93     | (A)--O  | -9.959     | 10.8        | 0.9         | 82.7        | 0.2   | 5.4   | 100         |
| 94     | (A)--O  | -9.626     | 1.3         | 0.1         | 86.1        | 0.5   | 12    | 100         |
| 95     | (A)--O  | -9.488     | 7.6         | 0.5         | 19.7        | 0.3   | 71.9  | 100         |
| 96     | (A)--O  | -9.464     | 1.4         | 0.3         | 8.8         | 0.3   | 89.3  | 100         |
| 97     | (A)--O  | -9.2       | 12.4        | 0.6         | 69.6        | 1.3   | 16.1  | 100         |
| 98     | (A)--O  | -8.939     | 1.4         | 0.1         | 18.3        | 2.2   | 78    | 100         |
| 99     | (A)--O  | -8.913     | 1.7         | 0.1         | 18.3        | 1.2   | 78.8  | 100         |
| 100    | (A)--O  | -8.7       | 3.7         | 0.3         | 56.3        | 4.6   | 35.1  | 100         |
| 101    | (A)--O  | -8.544     | 11.6        | 0.8         | 23.4        | 9.3   | 54.9  | 100         |
| 102    | (A)--O  | -8.012     | 12.8        | 0.3         | 43.9        | 7.8   | 35.3  | 100         |
| 103    | (A)--O  | -7.799     | 51.8        | 0           | 25          | 5     | 18.2  | 100         |
| 104    | (A)--O  | -7.453     | 74.8        | 10          | 14.2        | 0.1   | 0.8   | 100         |
| 105    | (A)--O  | -7.197     | 7.5         | 2.1         | 60.5        | 3.4   | 26.4  | 100         |
| 106    | (A)--O  | -6.827     | 34.4        | 0.3         | 59.8        | 0.6   | 4.8   | 100         |
| 107    | (A)--O  | -6.553     | 3.2         | 0           | 2.1         | 0.5   | 94.2  | 100         |
| 108    | (A)--O  | -6.467     | 2.8         | 0.1         | 2.7         | 0.3   | 94.1  | 100         |
| 109    | (A)--O  | -6.399     | 3.7         | 0.1         | 4.2         | 0.3   | 91.6  | 100         |
| 110    | (A)--O  | -6.297     | 1.2         | 0           | 6.1         | 0.9   | 91.8  | 100         |
| 111    | (A)--O  | -5.767     | 15.1        | 1           | 70.9        | 0.8   | 12.2  | 100         |
| 112    | (A)--V  | -2.204     | 42.1        | 5.2         | 46.2        | 1.6   | 4.9   | 100         |
| 113    | (A)--V  | -1.183     | 8.1         | 0.3         | 88.7        | 0.4   | 2.6   | 100         |
| 114    | (A)--V  | -0.753     | 76.8        | 2.5         | 14.2        | 2.3   | 4.3   | 100         |
| 115    | (A)--V  | -0.482     | 78.3        | 1.8         | 16.3        | 0.9   | 2.8   | 100         |
| 116    | (A)--V  | -0.053     | 14.6        | 0.1         | 17          | 5.9   | 62.4  | 100         |
| 117    | (A)--V  | 0.082      | 15.8        | 0.7         | 20.7        | 1.2   | 61.6  | 100         |
| 118    | (A)--V  | 0.171      | 5.3         | 0.4         | 9.5         | 0.9   | 83.8  | 100         |
| 119    | (A)--V  | 0.278      | 22.4        | 2.2         | 43.8        | 1.4   | 30.1  | 100         |
| 120    | (A)--V  | 0.399      | 7.1         | 0.4         | 8.7         | 0.8   | 83    | 100         |
| 121    | (A)--V  | 0.722      | 10.3        | 1           | 82.1        | 2     | 4.5   | 100         |
| 122    | (A)--V  | 1.013      | 94.8        | 0.3         | 1.3         | 1.4   | 2.3   | 100         |
| 123    | (A)--V  | 1.237      | 4.4         | 0.5         | 89.3        | 1.1   | 4.7   | 100         |
| 124    | (A)--V  | 1.487      | 10          | 0           | 46.7        | 5.7   | 37.5  | 100         |
| 125    | (A)--V  | 1.572      | 14.2        | 2.1         | 63.4        | 1.8   | 18.5  | 100         |
| 126    | (A)--V  | 1.705      | 11.8        | 0.4         | 7.6         | 0.5   | 79.8  | 100         |
| 127    | (A)--V  | 1.932      | 58.1        | 1.1         | 32.7        | 0.6   | 7.6   | 100         |
| 128    | (A)--V  | 2.078      | 26.1        | 2.8         | 55.8        | 1     | 14.3  | 100         |
| 129    | (A)--V  | 2.267      | 10.2        | 1.3         | 49.7        | 0.6   | 38.1  | 100         |
| 130    | (A)--V  | 2.407      | 12.2        | 0.1         | 7.6         | 1     | 79    | 100         |
| 131    | (A)--V  | 2.566      | 18.3        | 0.3         | 28.6        | 4.4   | 48.4  | 100         |

## VModes Analysis for **8b**

| Number | Orbital | Energy, eV | Group Number |              |             |       |             | Total |
|--------|---------|------------|--------------|--------------|-------------|-------|-------------|-------|
|        | Index   |            | Azole Ligand | Azole Hetero | Aryl Ligand | Boron | Biphenyl Ac |       |
| 96     | (A)--O  | -9.908     | 22.4         | 10.4         | 59.9        | 0.4   | 7           | 100   |
| 97     | (A)--O  | -9.6       | 2.4          | 0.1          | 87.4        | 0.4   | 9.6         | 100   |
| 98     | (A)--O  | -9.457     | 12.9         | 3.1          | 15          | 0.6   | 68.4        | 100   |
| 99     | (A)--O  | -9.451     | 3            | 0.9          | 7.6         | 0.5   | 88          | 100   |
| 100    | (A)--O  | -9.229     | 27.7         | 12.5         | 36          | 1.7   | 22.2        | 100   |
| 101    | (A)--O  | -9.012     | 23.7         | 35.2         | 34.1        | 1.2   | 5.7         | 100   |
| 102    | (A)--O  | -8.925     | 3.1          | 3.3          | 2           | 2     | 89.5        | 100   |
| 103    | (A)--O  | -8.877     | 1.5          | 0.8          | 16.3        | 0.6   | 80.8        | 100   |
| 104    | (A)--O  | -8.673     | 3.4          | 1.3          | 46.3        | 7.3   | 41.8        | 100   |
| 105    | (A)--O  | -8.441     | 14.1         | 3.5          | 40.6        | 6.4   | 35.3        | 100   |
| 106    | (A)--O  | -7.966     | 15.8         | 0.9          | 42.1        | 7.6   | 33.6        | 100   |
| 107    | (A)--O  | -7.761     | 48.7         | 0.3          | 24.1        | 5.5   | 21.5        | 100   |
| 108    | (A)--O  | -7.243     | 17.3         | 4.3          | 62.5        | 2     | 13.9        | 100   |
| 109    | (A)--O  | -7.048     | 46           | 23.4         | 12.3        | 1.8   | 16.4        | 100   |
| 110    | (A)--O  | -6.798     | 30.2         | 4.1          | 63.7        | 0.5   | 1.5         | 100   |
| 111    | (A)--O  | -6.541     | 3.4          | 0.1          | 1.9         | 0.5   | 94          | 100   |
| 112    | (A)--O  | -6.458     | 2.9          | 0.1          | 2.7         | 0.4   | 93.9        | 100   |
| 113    | (A)--O  | -6.377     | 4.8          | 0.2          | 3.9         | 0.2   | 90.8        | 100   |
| 114    | (A)--O  | -6.298     | 0.9          | 0            | 5.7         | 0.8   | 92.6        | 100   |
| 115    | (A)--O  | -5.752     | 14.8         | 2.5          | 71.5        | 0.7   | 10.4        | 100   |
| 116    | (A)--V  | -2.348     | 49           | 10.7         | 33.8        | 1.3   | 5.2         | 100   |
| 117    | (A)--V  | -1.208     | 9.4          | 3            | 84.9        | 0.3   | 2.4         | 100   |
| 118    | (A)--V  | -0.875     | 83           | 5.2          | 3.3         | 3.9   | 4.6         | 100   |
| 119    | (A)--V  | -0.561     | 65.2         | 21.9         | 10.9        | 0.6   | 1.5         | 100   |
| 120    | (A)--V  | -0.438     | 66.3         | 16.9         | 13.9        | 0.4   | 2.5         | 100   |
| 121    | (A)--V  | -0.027     | 21.2         | 4.3          | 17.1        | 6.2   | 51.2        | 100   |
| 122    | (A)--V  | 0.03       | 34.7         | 3.2          | 36.5        | 3.6   | 22          | 100   |
| 123    | (A)--V  | 0.116      | 13.7         | 1            | 17.4        | 0.3   | 67.6        | 100   |
| 124    | (A)--V  | 0.216      | 5.8          | 0.8          | 13.9        | 0.8   | 78.7        | 100   |
| 125    | (A)--V  | 0.39       | 5            | 0.4          | 3.1         | 0.7   | 90.8        | 100   |
| 126    | (A)--V  | 0.672      | 10           | 7.9          | 75.8        | 2.2   | 4.2         | 100   |
| 127    | (A)--V  | 1.096      | 25.1         | 26.5         | 46.8        | 0.6   | 1           | 100   |
| 128    | (A)--V  | 1.256      | 53.5         | 1.2          | 33.2        | 4.2   | 7.9         | 100   |
| 129    | (A)--V  | 1.373      | 29.6         | 8.1          | 57.3        | 0.7   | 4.3         | 100   |
| 130    | (A)--V  | 1.553      | 7            | 1.1          | 23.4        | 8.2   | 60.3        | 100   |
| 131    | (A)--V  | 1.717      | 4.6          | 0.9          | 17.9        | 0.5   | 76.2        | 100   |
| 132    | (A)--V  | 1.801      | 8            | 6.4          | 75.3        | 0.4   | 9.9         | 100   |
| 133    | (A)--V  | 2.093      | 86.1         | 0.4          | 2.6         | 0.8   | 10.1        | 100   |
| 134    | (A)--V  | 2.309      | 6.1          | 1.2          | 58.6        | 0.8   | 33.3        | 100   |
| 135    | (A)--V  | 2.374      | 11.5         | 3.1          | 18.3        | 2     | 65          | 100   |

### NMR data for 3a

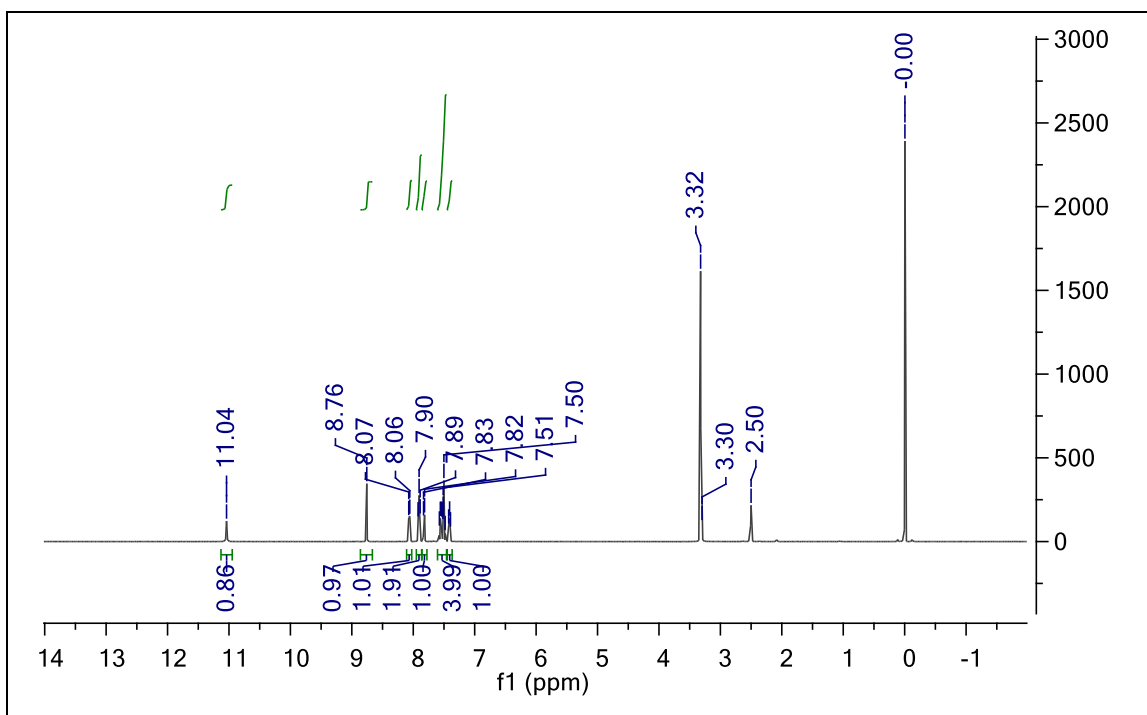

**FIG 40** 23HNBO\_L, <sup>1</sup>H NMR (500 MHz, dmsol)

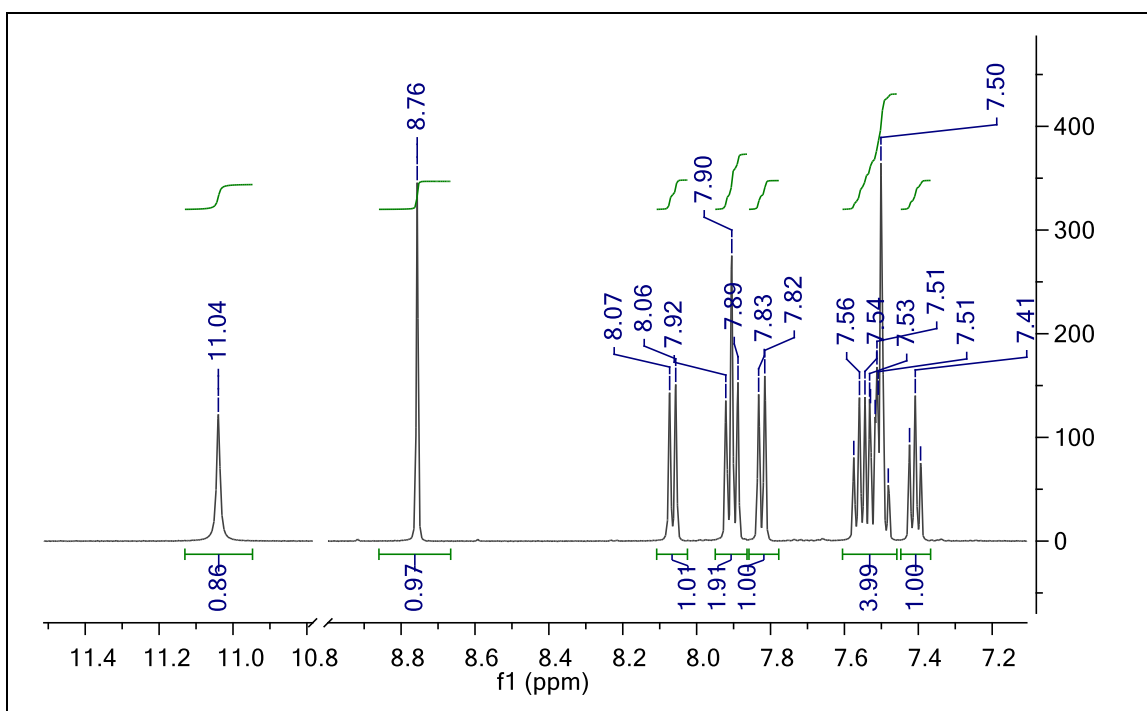

**FIG 41** 23HNBO\_L, <sup>1</sup>H NMR (500 MHz, dmsol)  $\delta$  11.04, 8.76, 8.07, 8.06, 7.92, 7.90, 7.89, 7.83, 7.82, 7.57, 7.56, 7.54, 7.53, 7.52, 7.51, 7.51, 7.50, 7.48, 7.42, 7.41, 7.39, 3.32, 3.30, 2.50, -0.00.

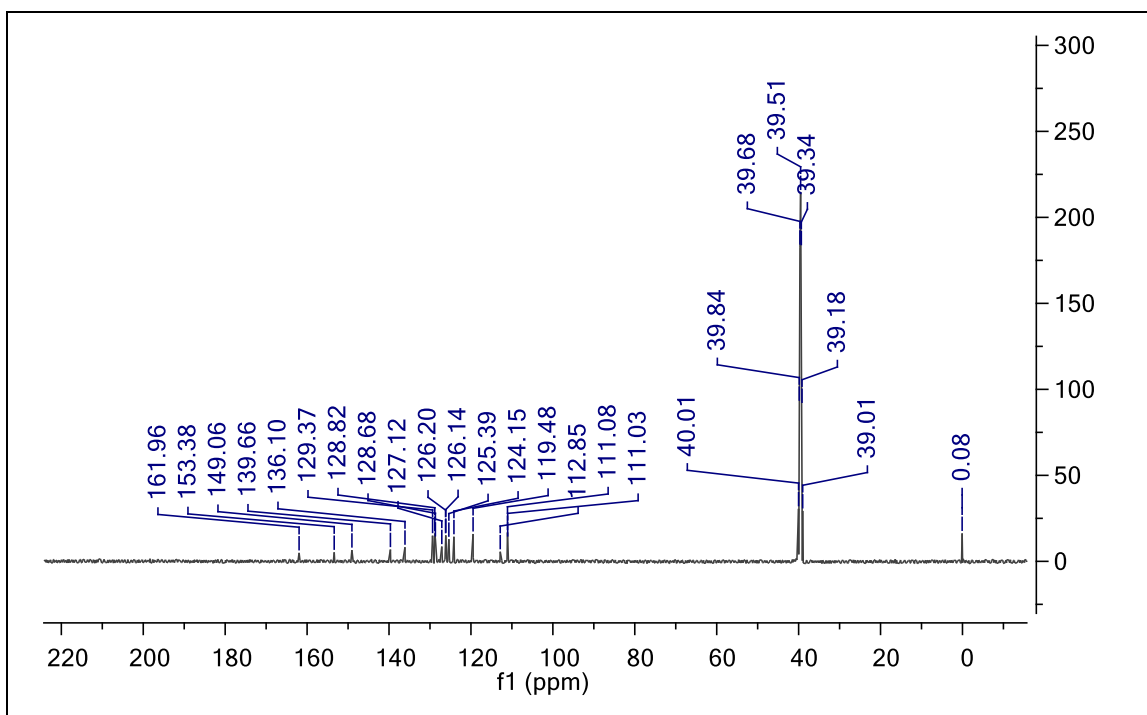

**FIG 42** 23HNBO\_L,  $^{13}\text{C}$  NMR (126 MHz, dmsol)

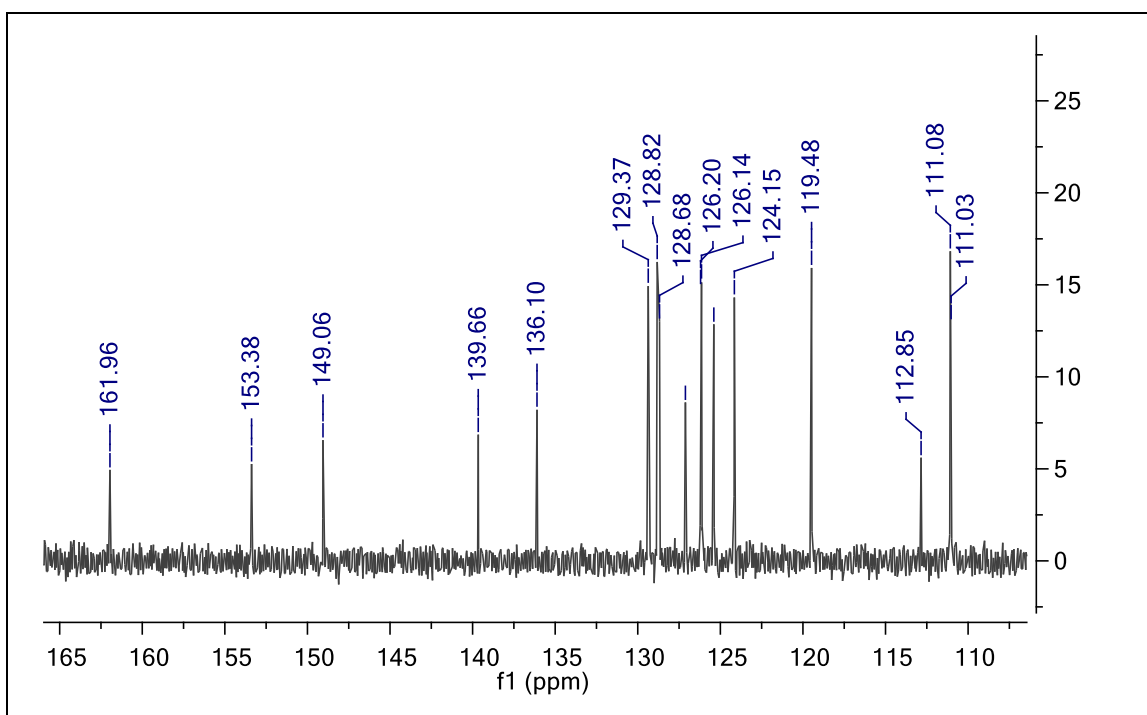

**FIG 43** 23HNBO\_L,  $^{13}\text{C}$  NMR (126 MHz, dmsol)  $\delta$  161.96, 153.38, 149.06, 139.66, 136.10, 129.37, 128.82, 128.68, 127.12, 126.20, 126.14, 125.39, 124.15, 119.48, 112.85, 111.08, 111.03, 40.01, 39.84, 39.68, 39.51, 39.34, 39.18, 39.01, 0.08.

### NMR data for 3b



**FIG 44** 23HNBT\_L, <sup>1</sup>H NMR (500 MHz, dmsol)

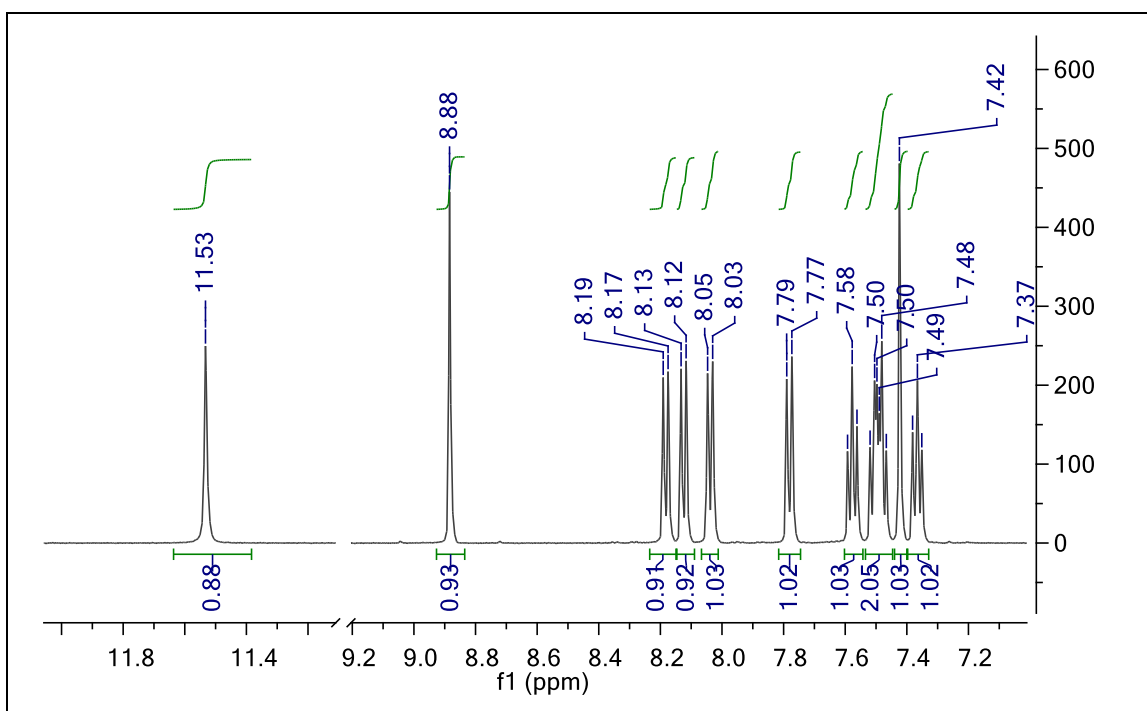

**FIG 45** 23HNBT\_L, <sup>1</sup>H NMR (500 MHz, dmsol)  $\delta$  11.53, 8.88, 8.19, 8.17, 8.13, 8.12, 8.05, 8.03, 7.79, 7.77, 7.59, 7.58, 7.56, 7.52, 7.50, 7.50, 7.49, 7.48, 7.47, 7.42, 7.38, 7.37, 7.35, 3.33, 2.50, -0.01.

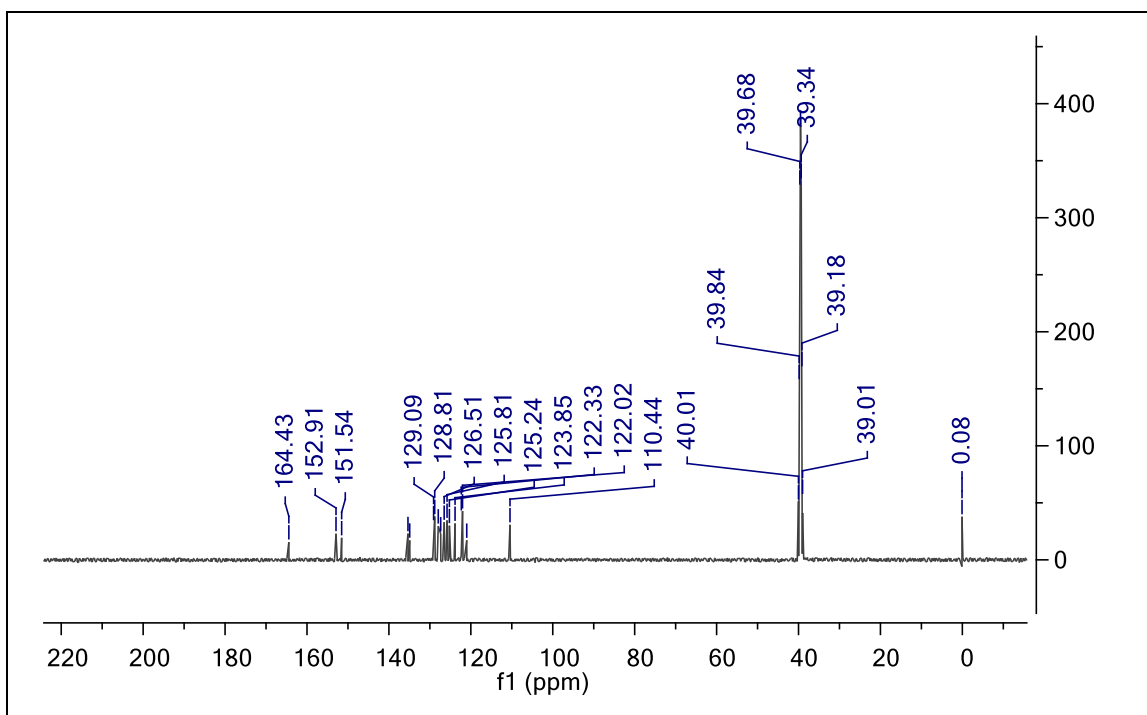

**FIG 46** 23HNBT\_L,  $^{13}\text{C}$  NMR (126 MHz, dmso)

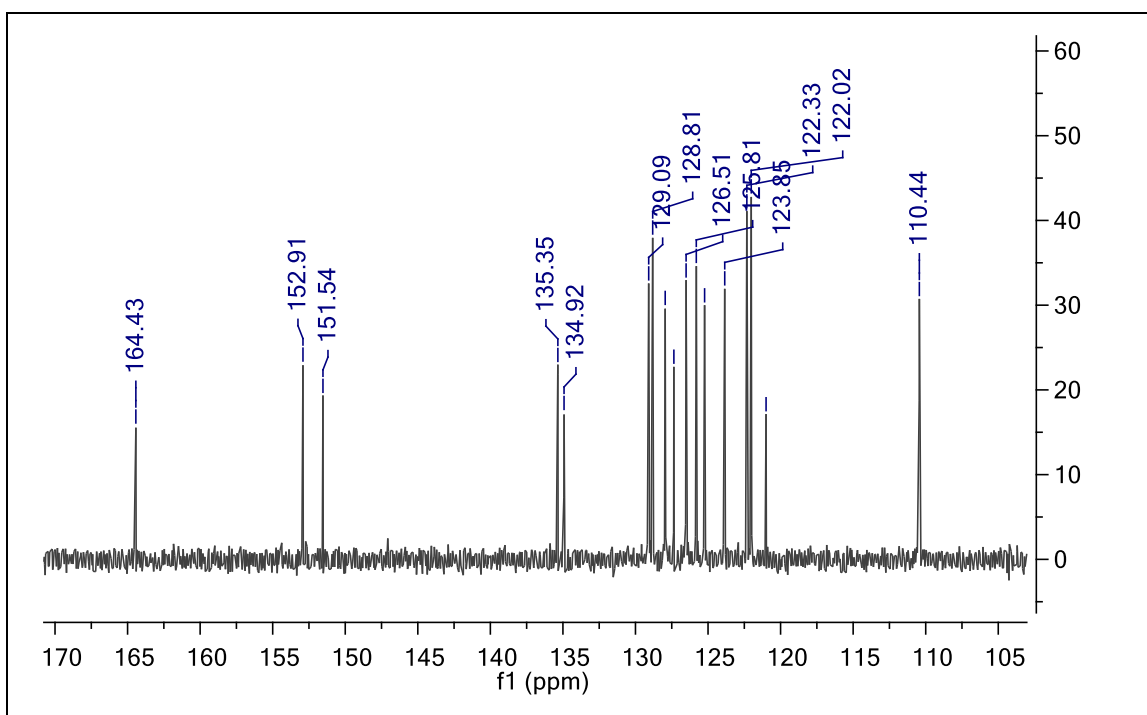

**FIG 47** 23HNBT\_L,  $^{13}\text{C}$  NMR (126 MHz, dmso)  $\delta$  164.43, 152.91, 151.54, 135.35, 134.92, 129.09, 128.81, 127.95, 127.35, 126.51, 125.81, 125.24, 123.85, 122.33, 122.02, 121.00, 110.44, 40.01, 39.84, 39.68, 39.51, 39.34, 39.18, 39.01.

### NMR data for 4a

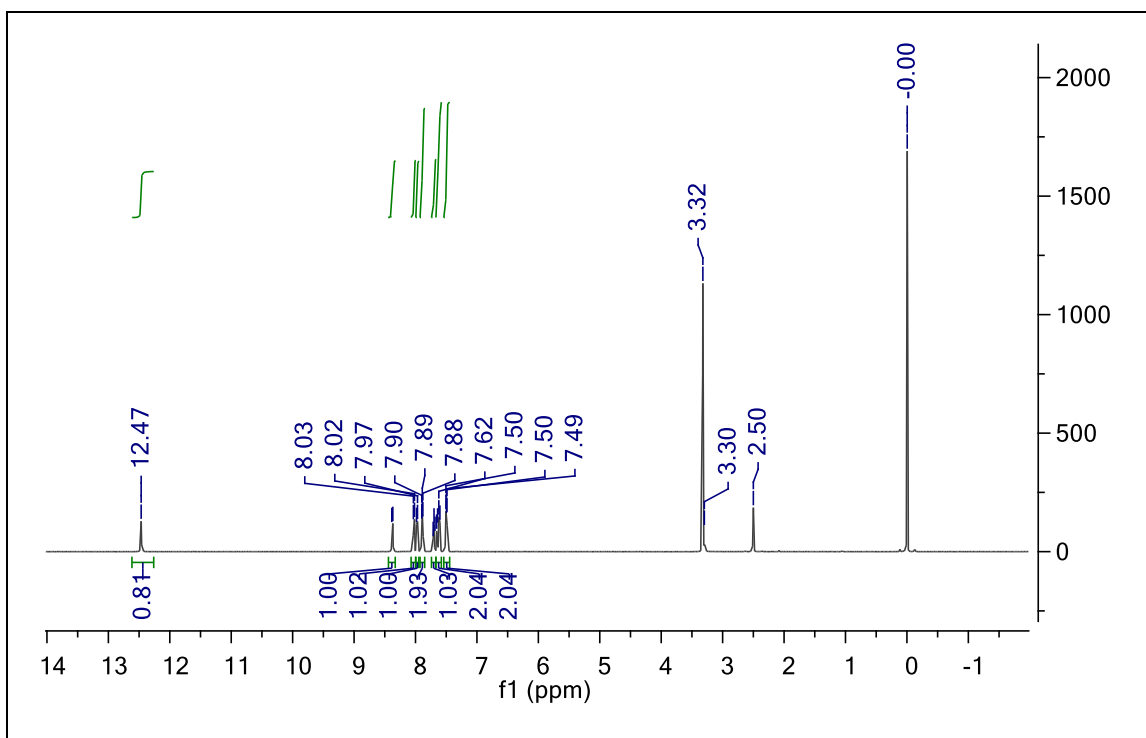

FIG 32 12HNBO\_L, <sup>1</sup>H NMR (500 MHz, dmsol)

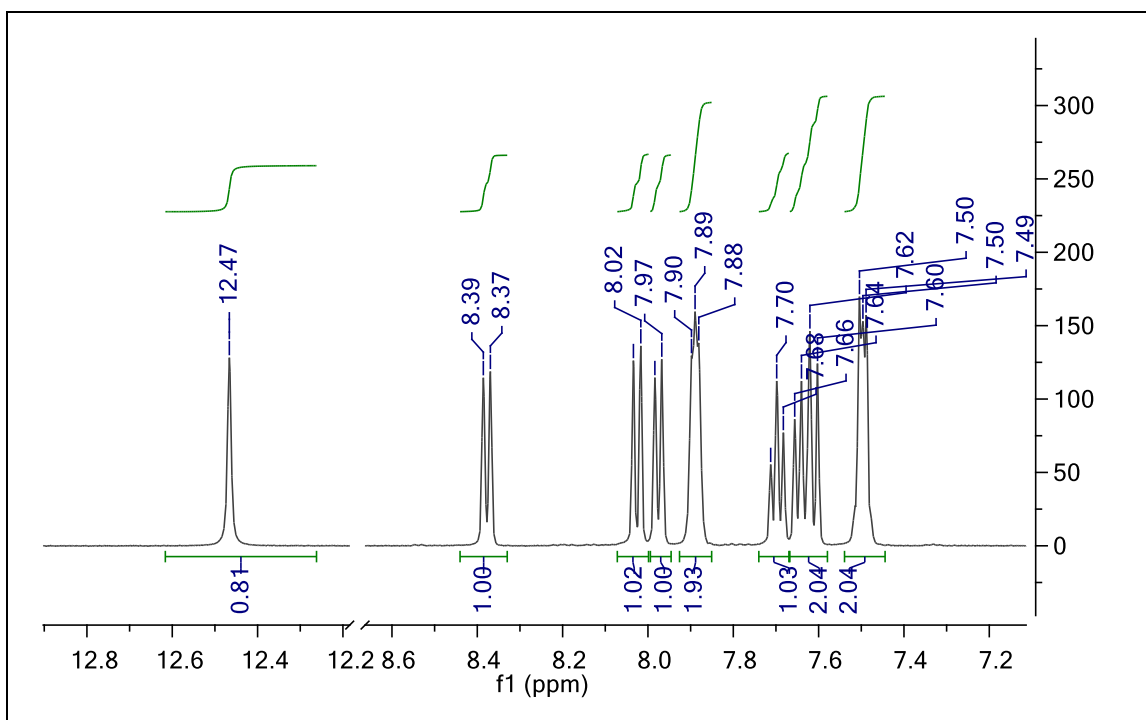

FIG 33 12HNBO\_L, <sup>1</sup>H NMR (500 MHz, dmsol)  $\delta$  12.47, 8.39, 8.37, 8.03, 8.02, 7.98, 7.97, 7.90, 7.89, 7.88, 7.71, 7.70, 7.68, 7.66, 7.64, 7.62, 7.60, 7.50, 7.50, 7.49, 3.32, 3.30, 2.50, -0.00.



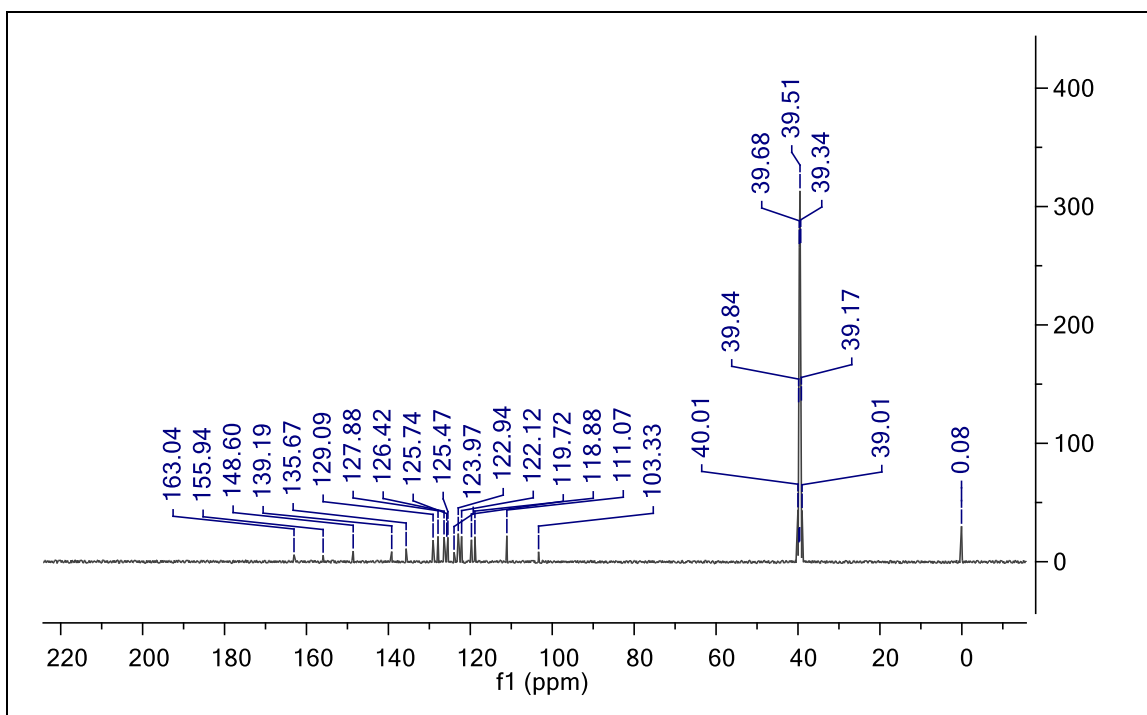

**FIG 34** 12HNBO\_L,  $^{13}\text{C}$  NMR (126 MHz, dmsol)

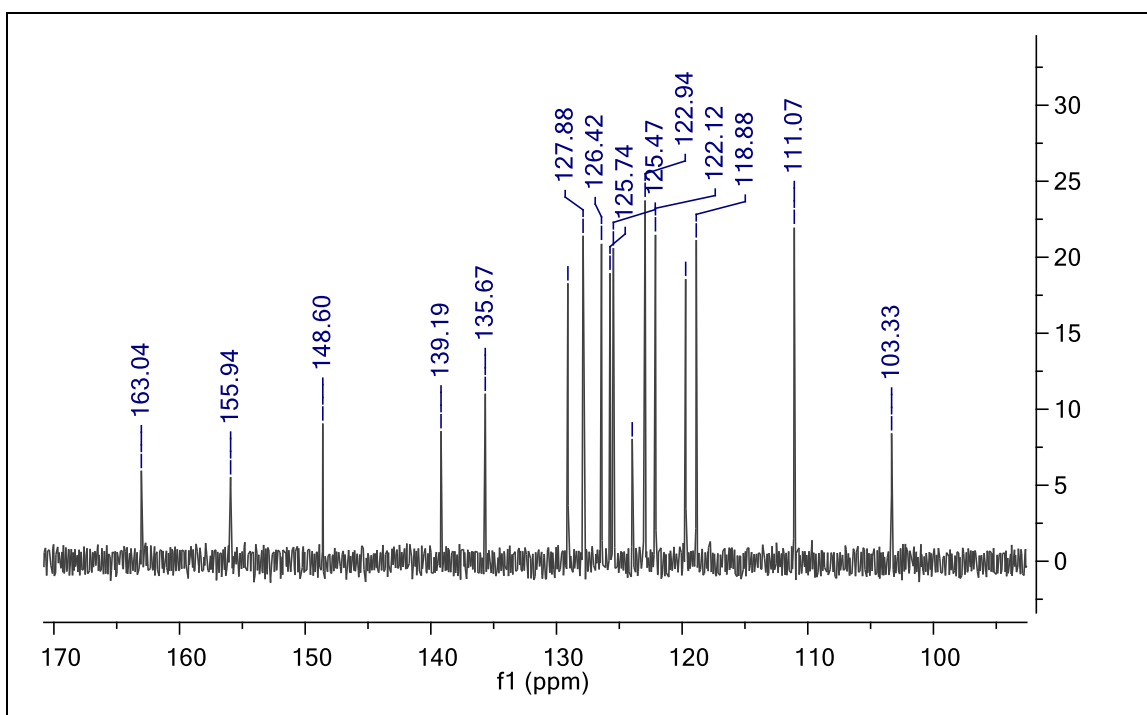

**FIG 35** 12HNBO\_L,  $^{13}\text{C}$  NMR (126 MHz, dmsol)  $\delta$  163.04, 155.94, 148.60, 139.19, 135.67, 129.09, 127.88, 126.42, 125.74, 125.47, 123.97, 122.94, 122.12, 119.72, 118.88, 111.07, 103.33, 40.01, 39.84, 39.77, 39.68, 39.60, 39.51, 39.34, 39.17, 39.01, 0.08.

### NMR data for 4b

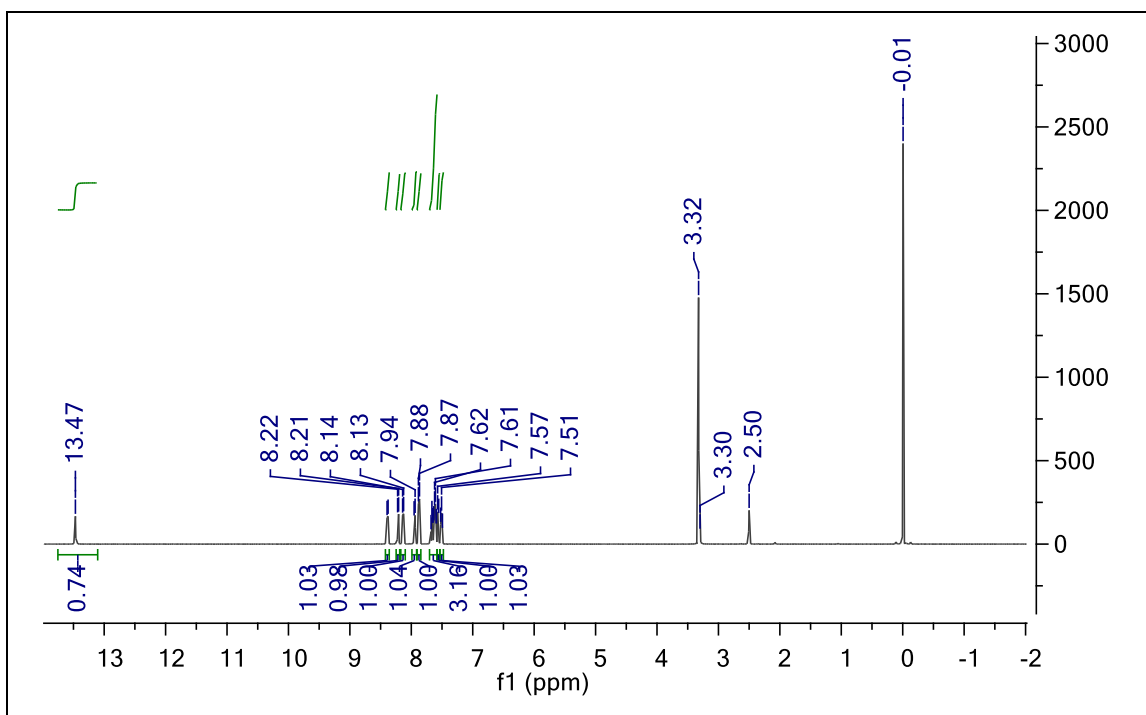

FIG 36 12HNBT\_L, <sup>1</sup>H NMR (500 MHz, dmsol) δ

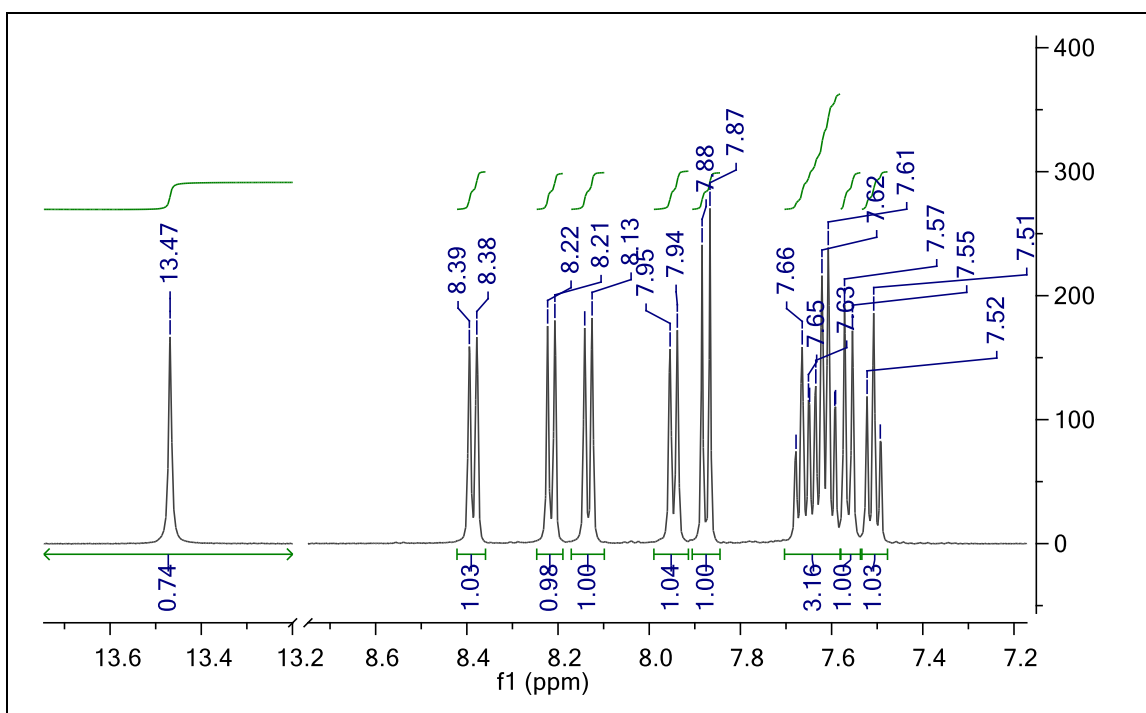

FIG 37 12HNBT\_L, <sup>1</sup>H NMR (500 MHz, dmsol) δ 13.47, 8.39, 8.38, 8.22, 8.21, 8.14, 8.13, 7.95, 7.94, 7.88, 7.87, 7.68, 7.66, 7.65, 7.65, 7.63, 7.62, 7.61, 7.59, 7.59, 7.57, 7.55, 7.52, 7.51, 7.49, 3.32, 3.30, 2.50, -0.01.

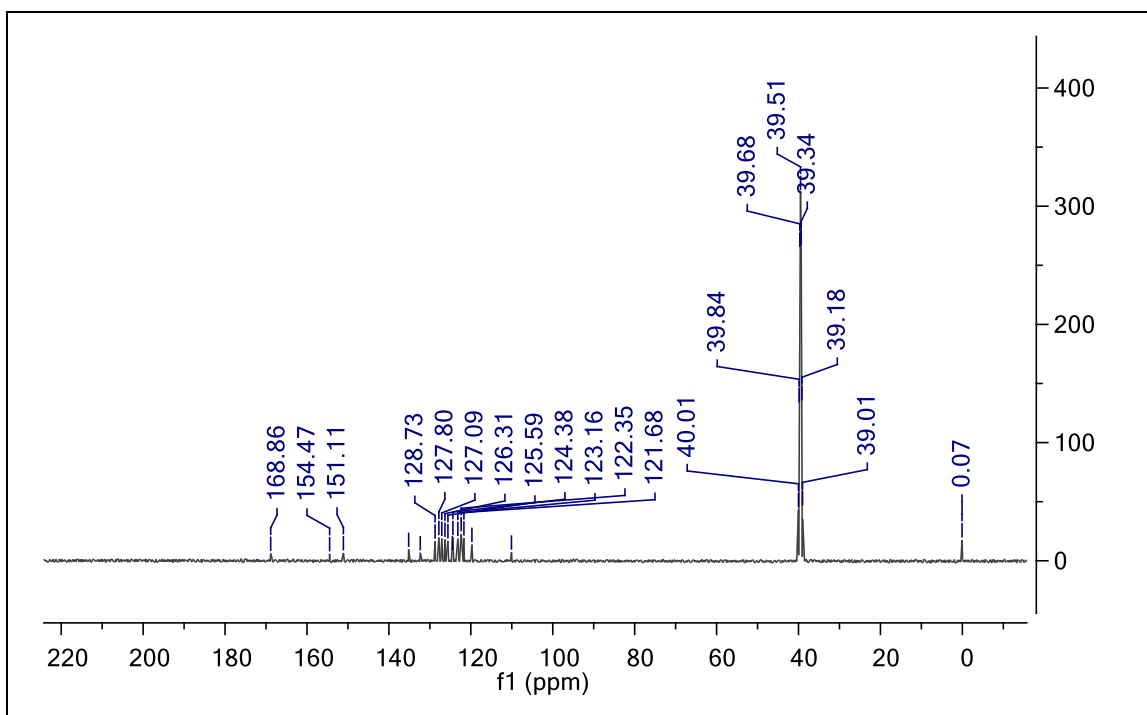

**FIG 38** 12HNBT\_L,  $^{13}\text{C}$  NMR (126 MHz, dmsol)

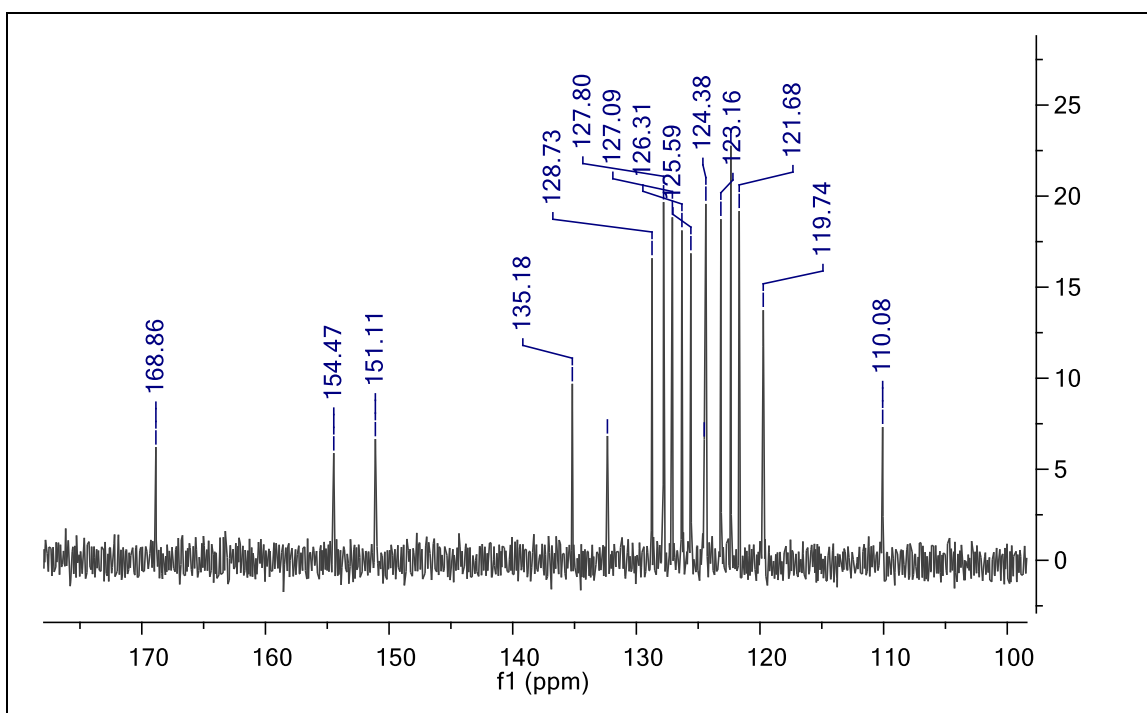

**FIG 39** 12HNBT\_L,  $^{13}\text{C}$  NMR (126 MHz, dmsol)  $\delta$  168.86, 154.47, 151.11, 135.18, 132.34, 128.73, 127.80, 127.09, 126.31, 125.59, 124.51, 124.38, 123.16, 122.35, 121.68, 119.74, 110.08, 40.01, 39.84, 39.68, 39.51, 39.34, 39.18, 39.01,

### NMR data for 5

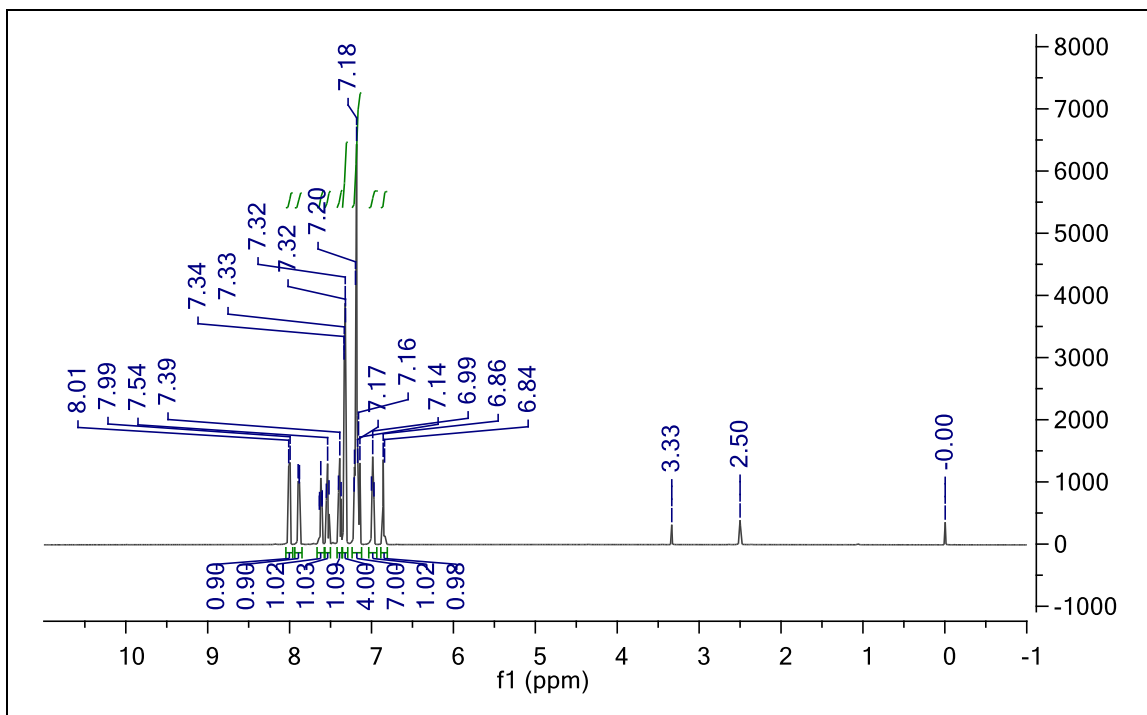

**FIG 48** HPBO, <sup>1</sup>H NMR (500 MHz, dms)

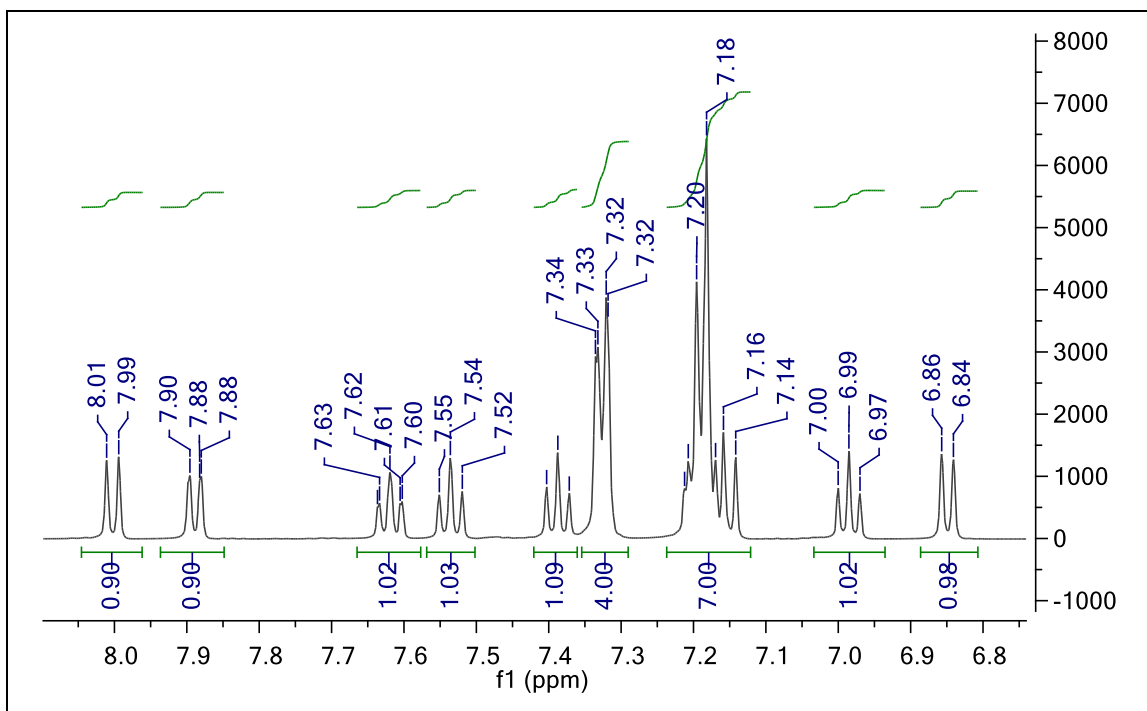

**FIG 49** HPBO, <sup>1</sup>H NMR (500 MHz, dms)  $\delta$  8.01, 7.99, 7.90, 7.88, 7.88, 7.64, 7.63, 7.62, 7.61, 7.60, 7.55, 7.54, 7.52, 7.40, 7.39, 7.37, 7.34, 7.33, 7.32, 7.32, 7.21, 7.21, 7.20, 7.18, 7.17, 7.16, 7.14, 7.00, 6.99, 6.97, 6.86, 6.84, 3.33, 2.50, -0.00.

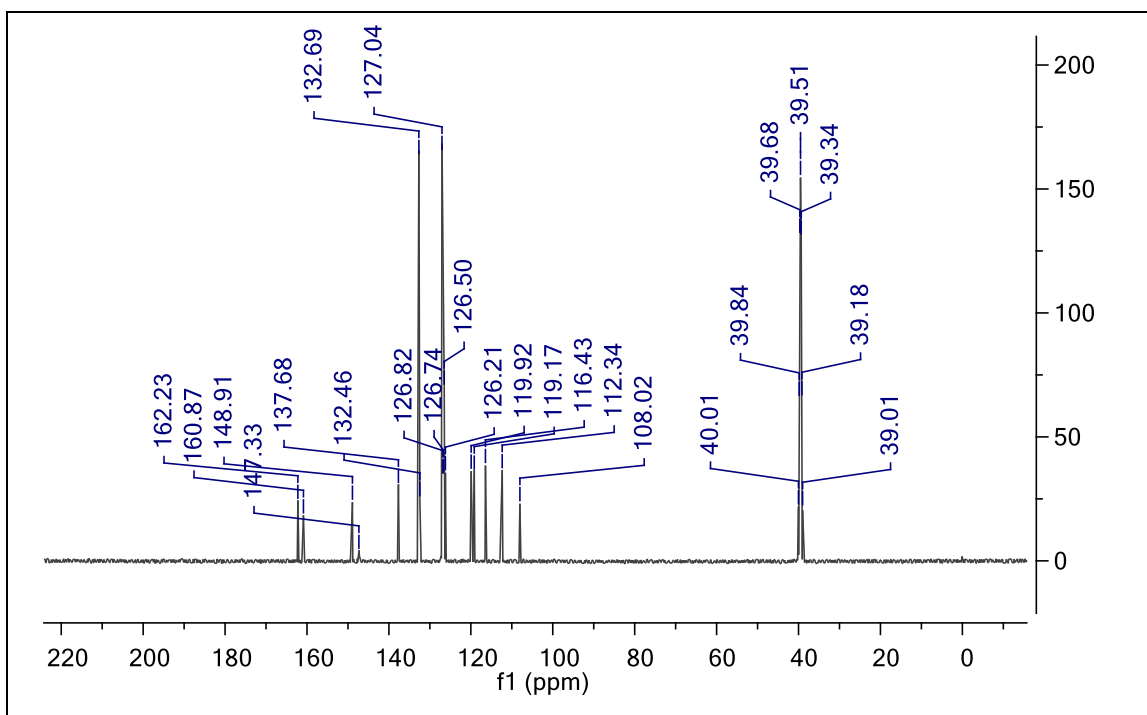

**FIG 50** HPBO, <sup>13</sup>C NMR (126 MHz, dmsol) δ

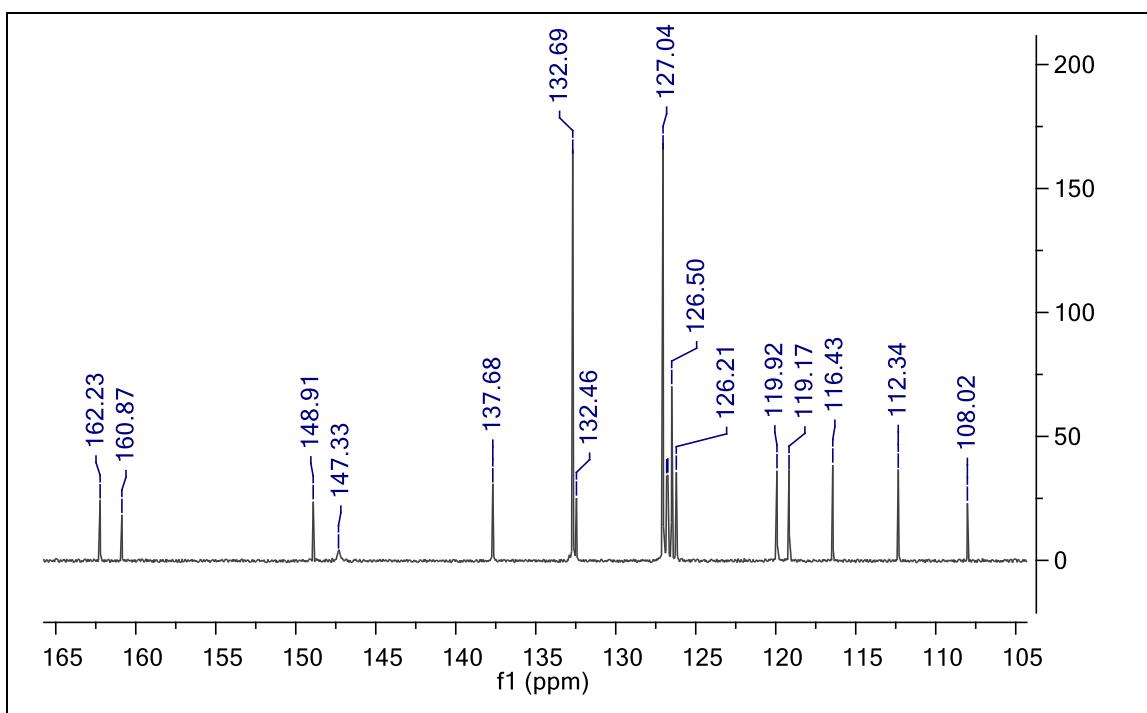

**FIG 51** HPBO, <sup>13</sup>C NMR (126 MHz, dmsol) δ 162.23, 160.87, 148.91, 147.33, 137.68, 132.69, 132.46, 127.04, 126.82, 126.74, 126.50, 126.21, 119.92, 119.17, 116.43, 112.34, 108.02, 40.01, 39.84, 39.68, 39.51, 39.34, 39.18, 39.01.

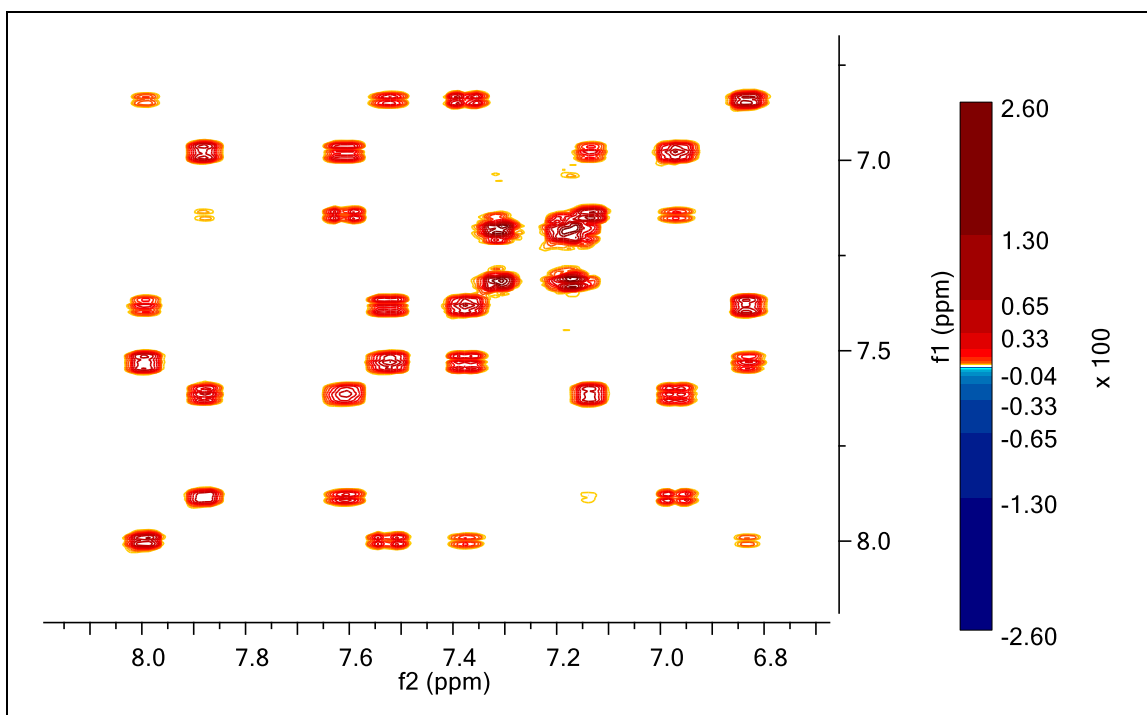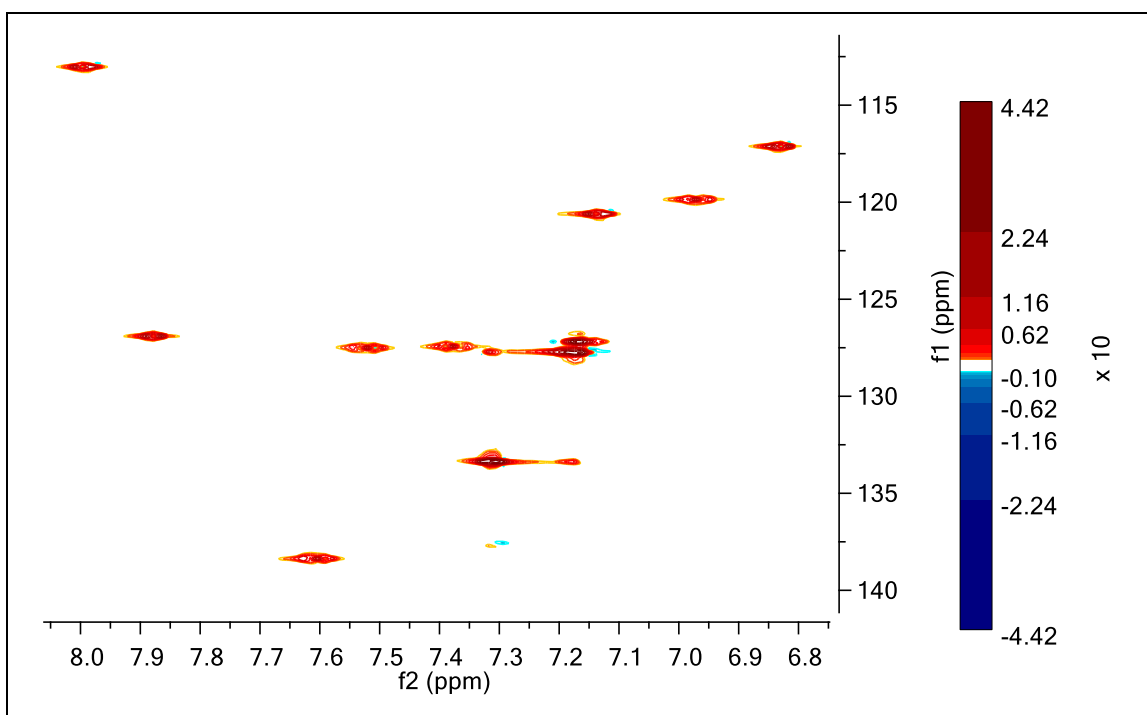

NMR data for 6

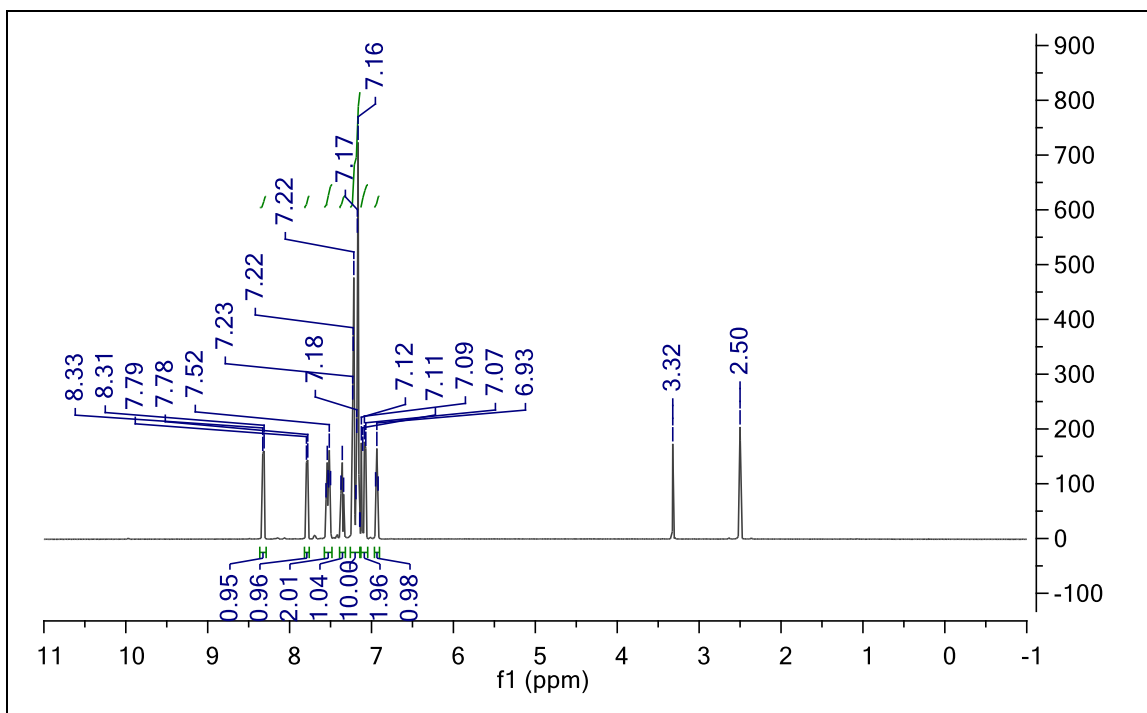

FIG 54 HPBT, <sup>1</sup>H NMR (500 MHz, dmsol)

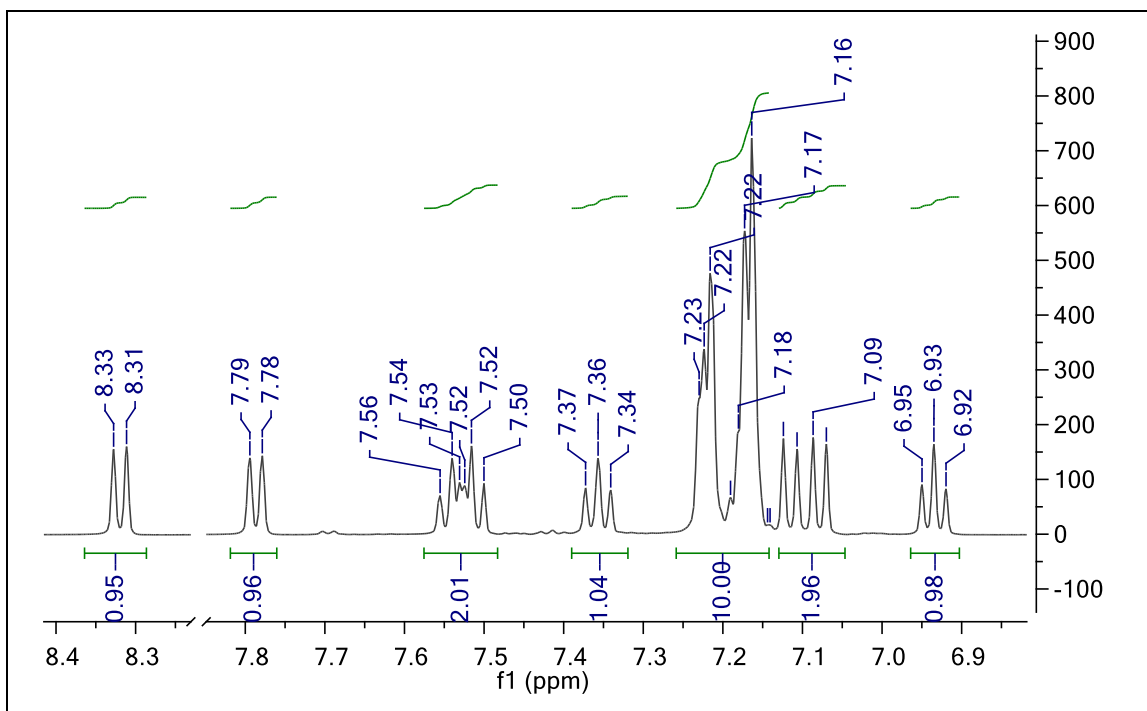

FIG 55 HPBT, <sup>1</sup>H NMR (500 MHz, dmsol)  $\delta$  8.33, 8.31, 7.79, 7.78, 7.56, 7.54, 7.53, 7.52, 7.52, 7.50, 7.37, 7.36, 7.34, 7.23, 7.22, 7.22, 7.19, 7.18, 7.17, 7.16, 7.14, 7.14, 7.12, 7.11, 7.09, 7.07, 6.95, 6.93, 6.92, 3.32, 2.50.

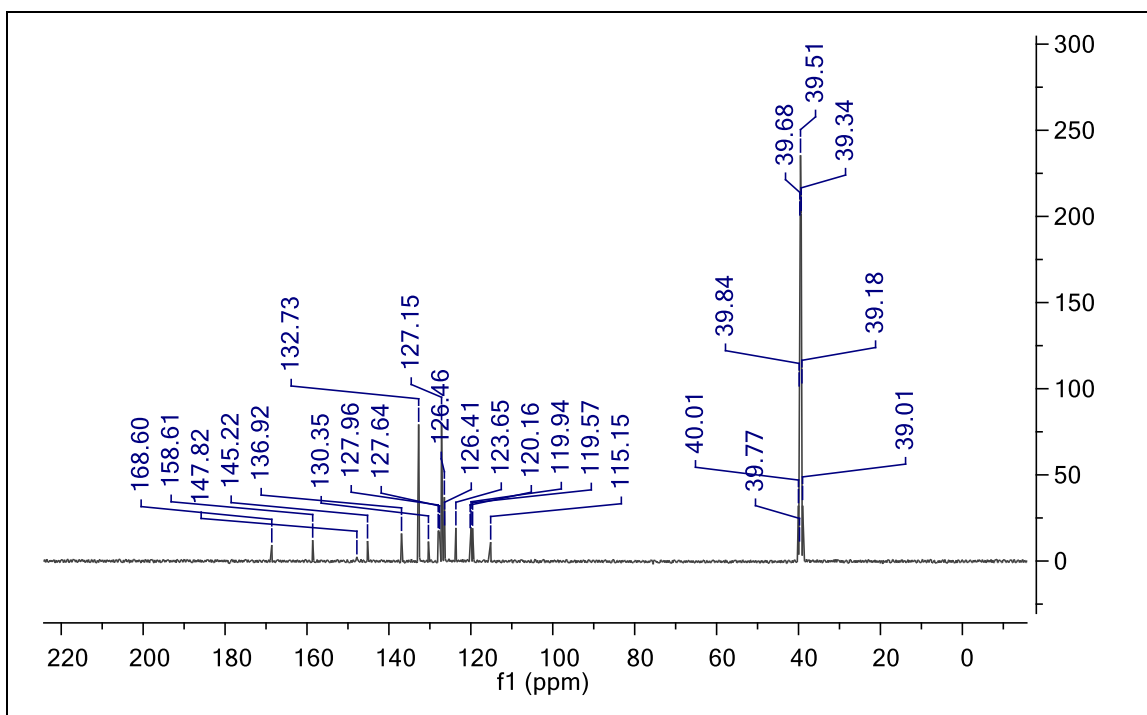

**FIG 56** HPBT,  $^{13}\text{C}$  NMR (126 MHz, dmsd)

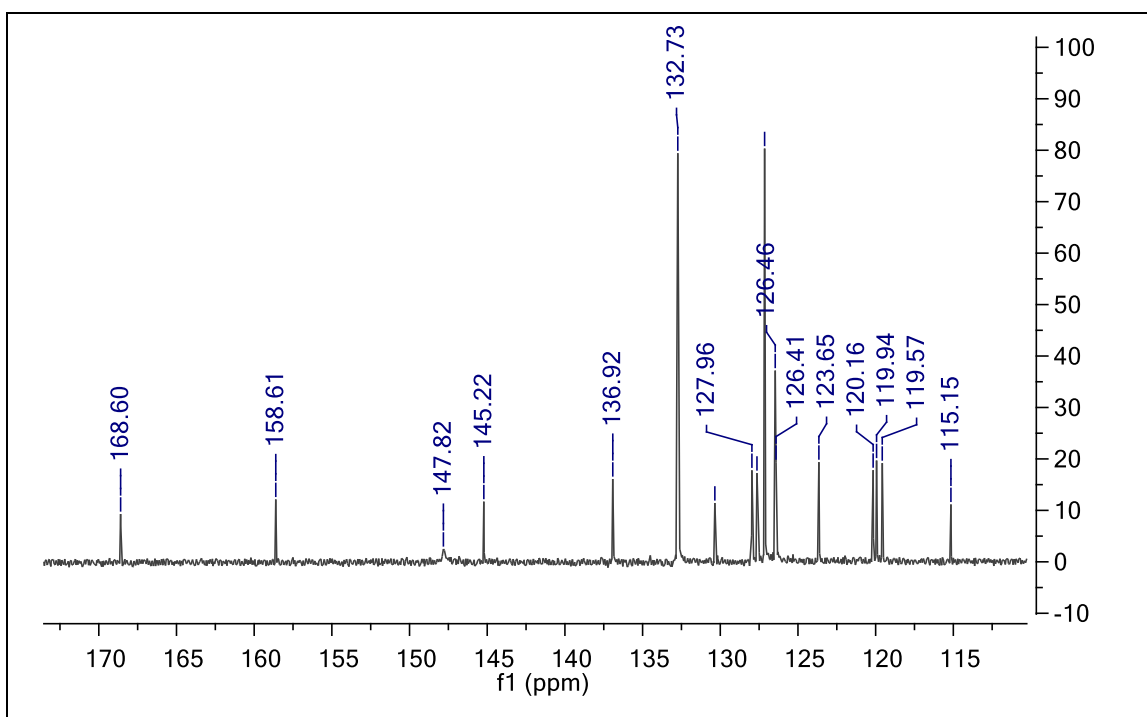

**FIG 57** HPBT,  $^{13}\text{C}$  NMR (126 MHz, dmsd)  $\delta$  168.60, 158.61, 147.82, 145.22, 136.92, 132.73, 130.35, 127.96, 127.64, 127.15, 126.46, 126.41, 123.65, 120.16, 119.94, 119.57, 115.15, 40.01, 39.84, 39.77, 39.68, 39.51, 39.34, 39.18, 39.01.



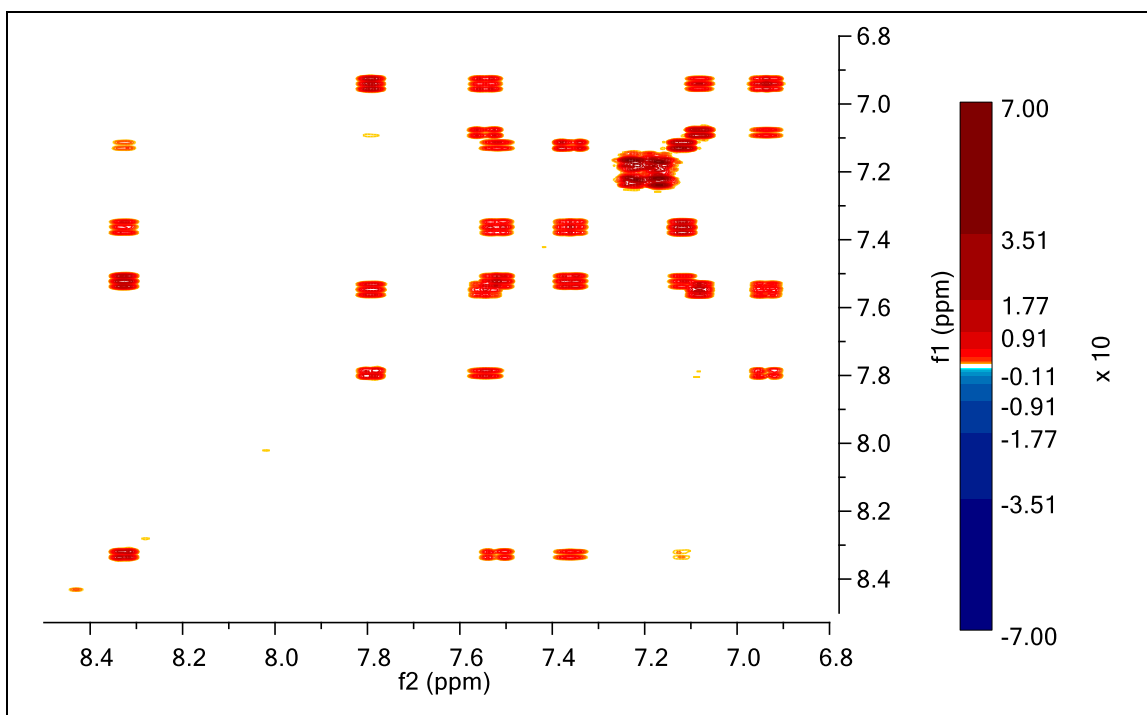

**FIG 58** HPBT, G-COSY (dmsol)

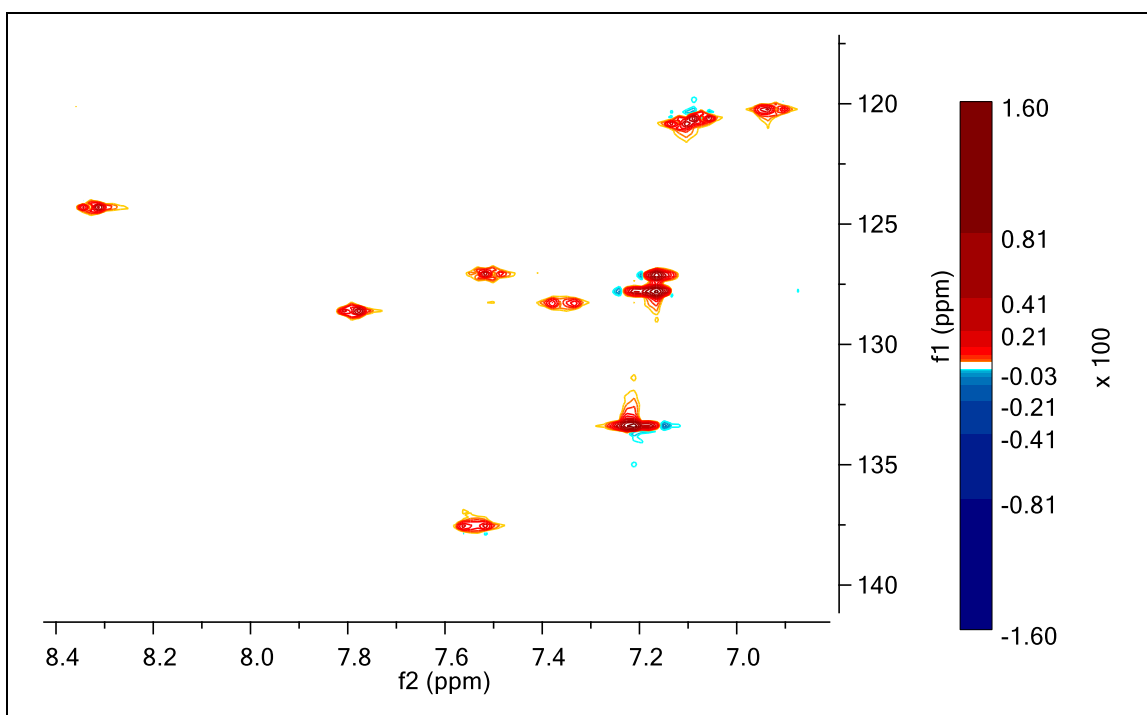

**FIG 59** HPBT, G-HMQC (dmsol)

NMR data of 7a

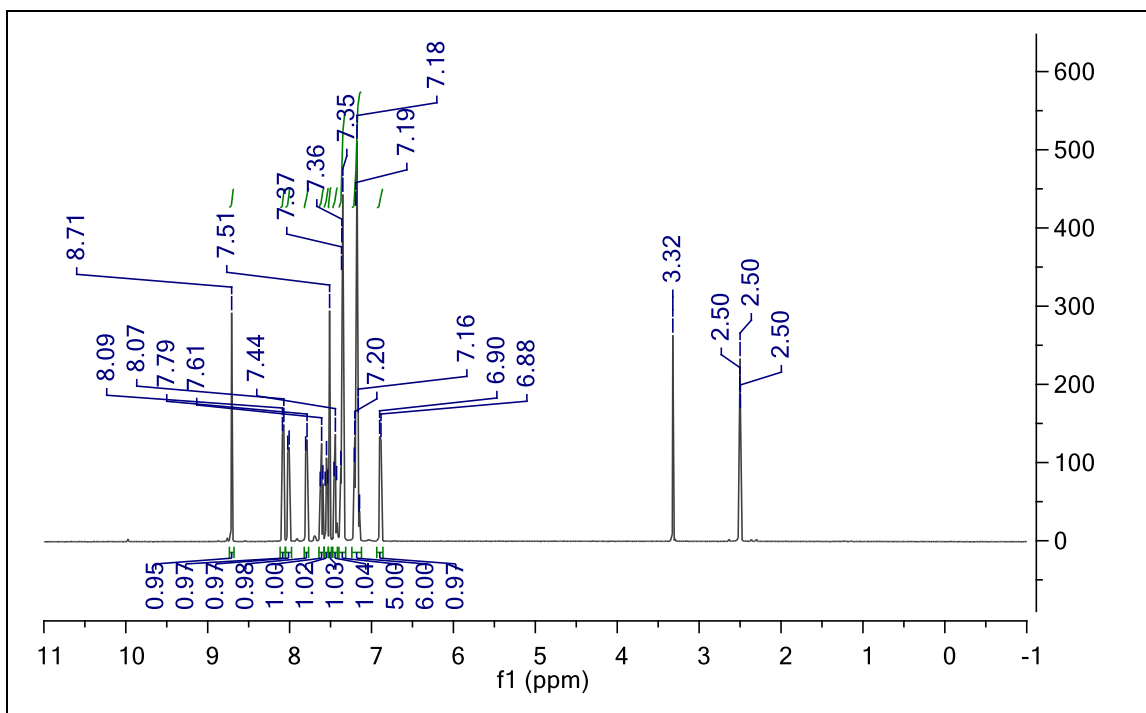

FIG 72 23HNBO, <sup>1</sup>H NMR (500 MHz, dmsol)

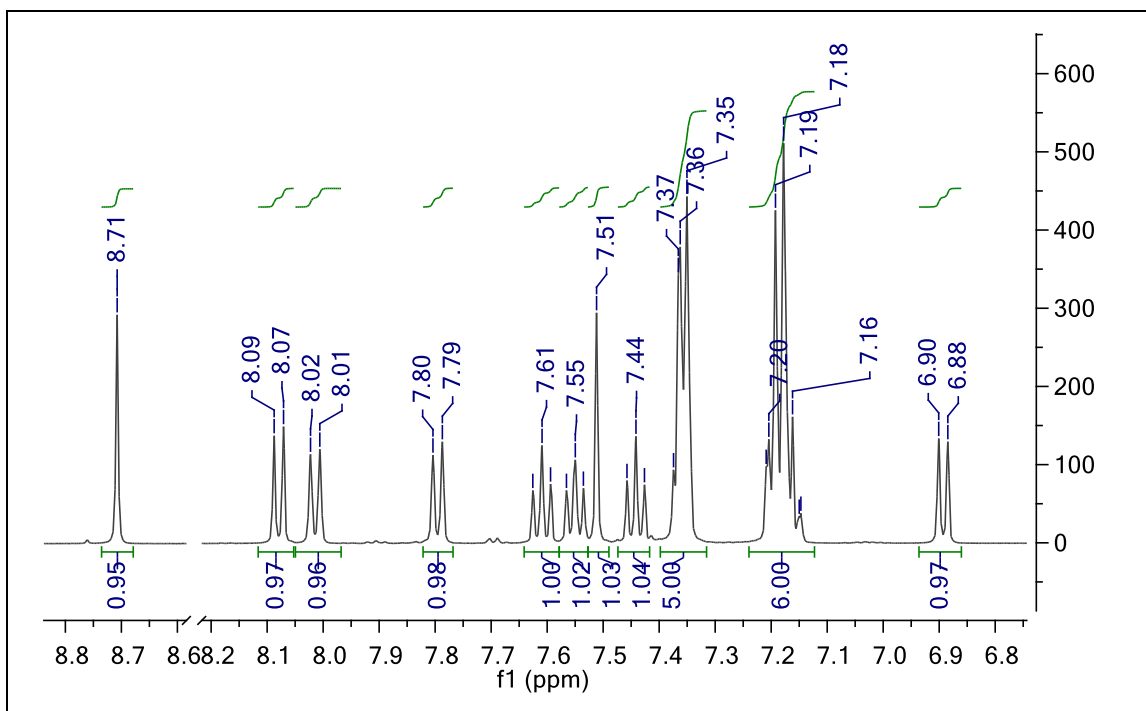

FIG 73 23HNBO, <sup>1</sup>H NMR (500 MHz, dmsol)  $\delta$  8.71, 8.09, 8.07, 8.02, 8.01, 7.80, 7.79, 7.63, 7.61, 7.59, 7.57, 7.55, 7.54, 7.51, 7.46, 7.44, 7.43, 7.37, 7.37, 7.36, 7.35, 7.21, 7.20, 7.19, 7.18, 7.16, 7.15, 7.15, 6.90, 6.88, 3.32, 2.50, 2.50, 2.50.

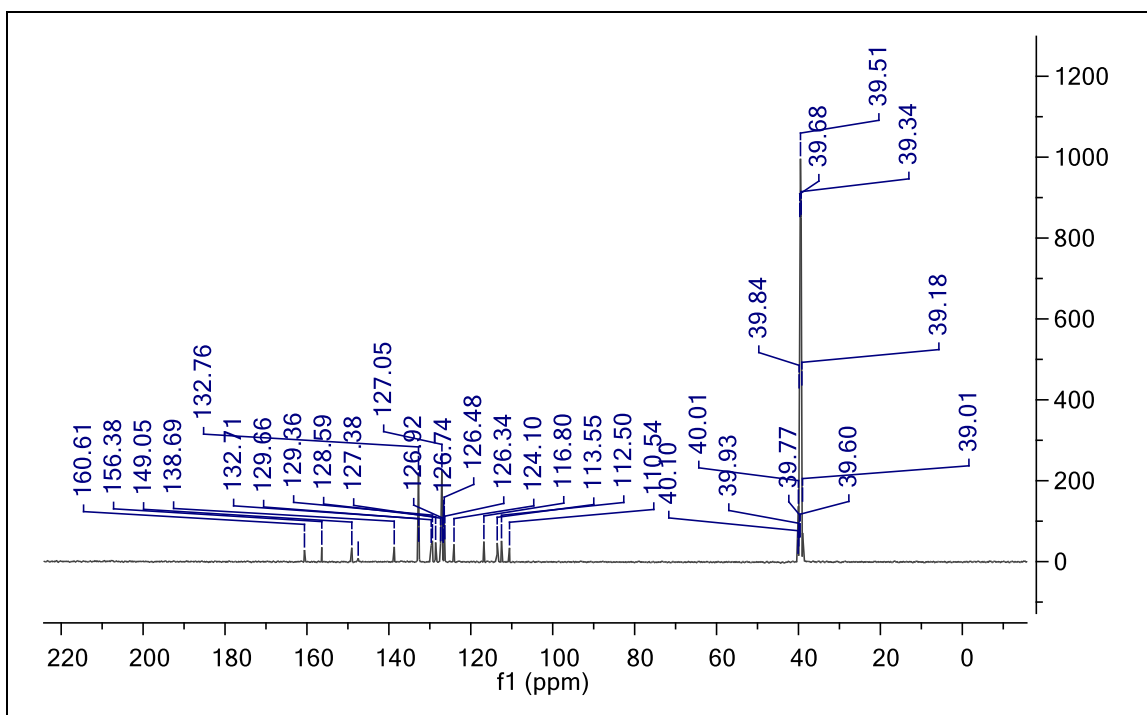

**FIG 74** 23HNBO,  $^{13}\text{C}$  NMR (126 MHz, dmsol)

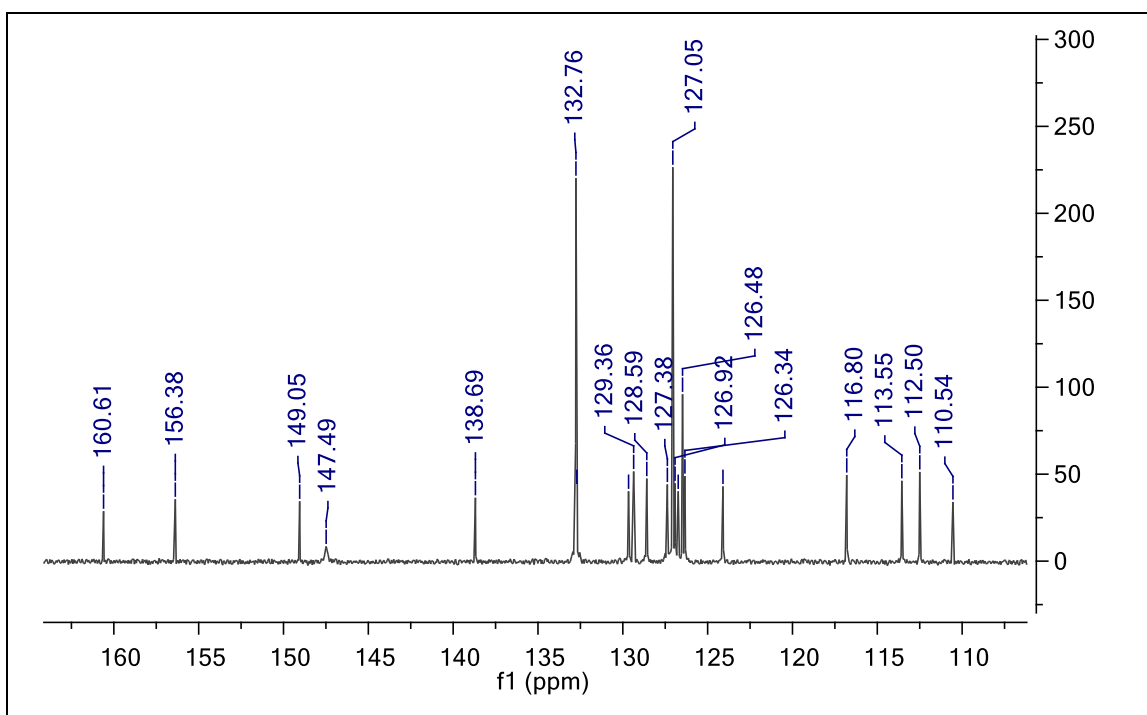

**FIG 75** 23HNBO,  $^{13}\text{C}$  NMR (126 MHz, dmsol)  $\delta$  160.61, 156.38, 149.05, 147.49, 138.69, 132.76, 132.71, 129.66, 129.36, 128.59, 127.38, 127.05, 126.92, 126.74, 126.48, 126.34, 124.10, 116.80, 113.55, 112.50, 110.54, 40.10, 40.01, 39.93, 39.84, 39.77, 39.68, 39.60, 39.51, 39.34, 39.18, 39.01.

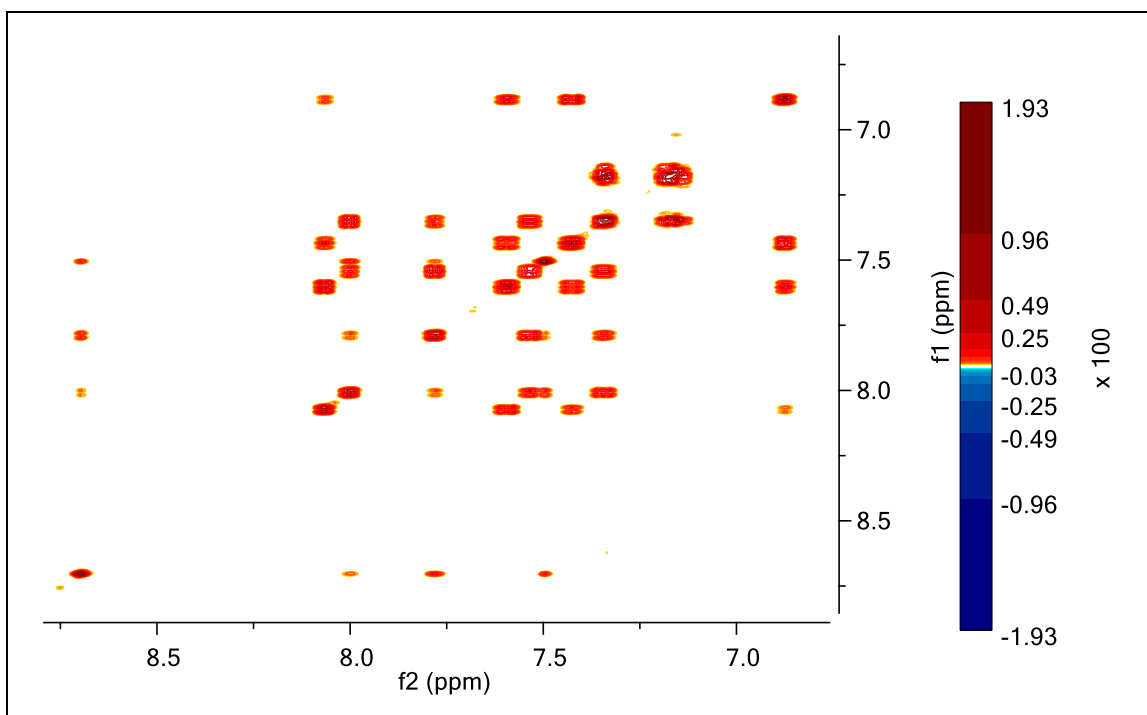

**FIG 76** 23HNBO, G-COSY (dmsol)

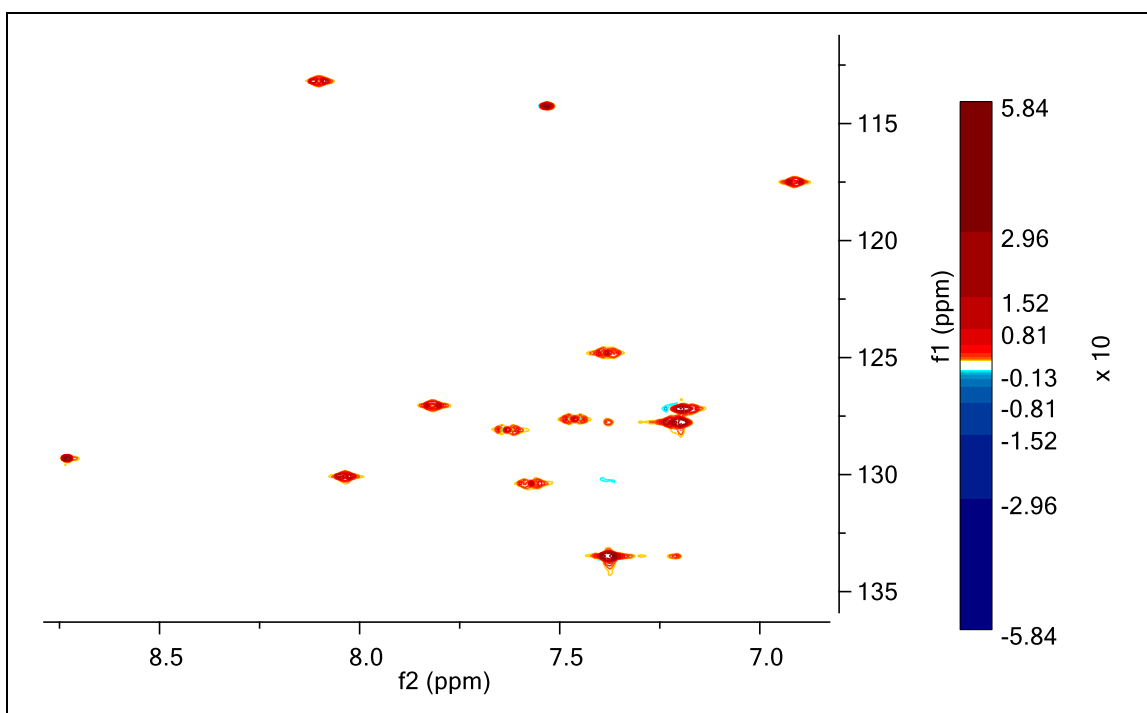

**FIG 77** 23HNBO, G-HMQC (dmsol)

NMR data of 7b

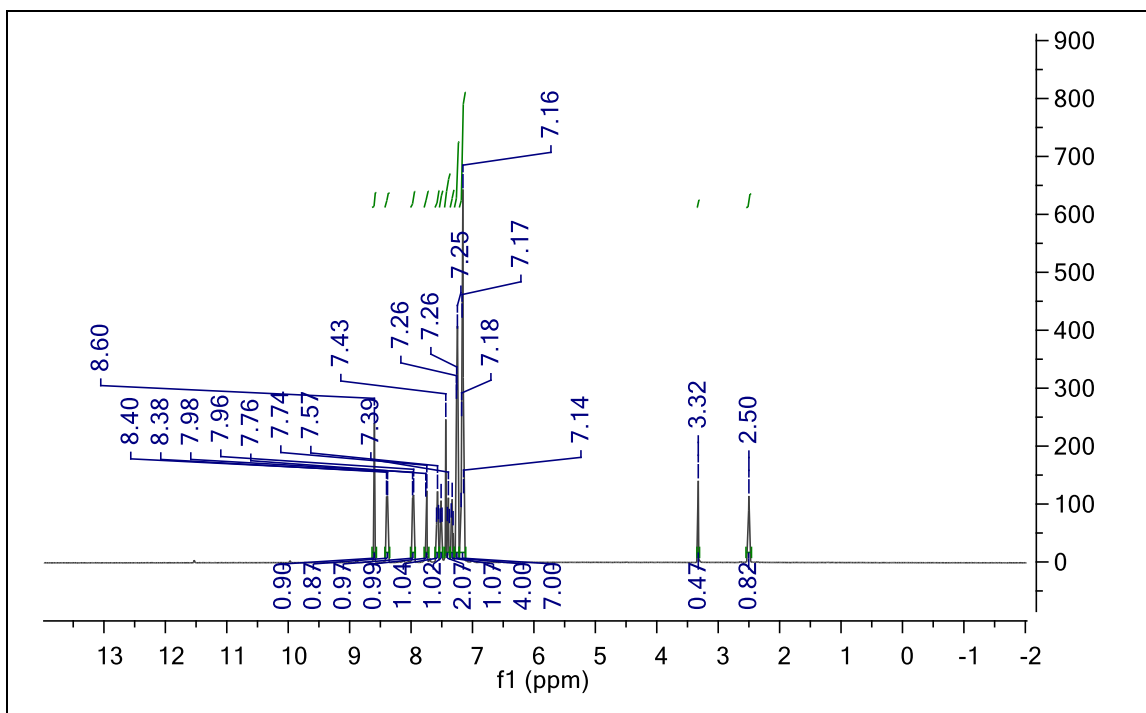

FIG 78 23HNBT, <sup>1</sup>H NMR (500 MHz, dmsol)

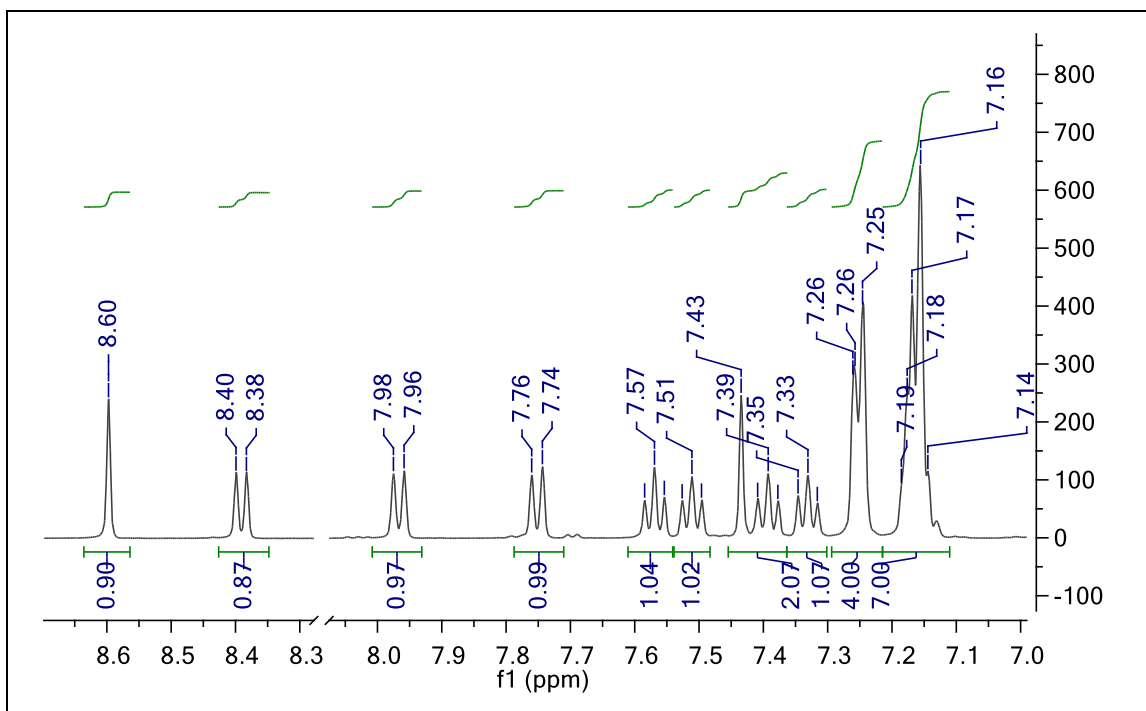

FIG 79 23HNBT, <sup>1</sup>H NMR (500 MHz, dmsol)  $\delta$  8.60, 8.40, 8.38, 7.98, 7.96, 7.76, 7.74, 7.58, 7.57, 7.55, 7.53, 7.51, 7.50, 7.43, 7.41, 7.39, 7.38, 7.35, 7.33, 7.32, 7.26, 7.26, 7.25, 7.19, 7.18, 7.17, 7.16, 7.14, 3.32, 2.50.

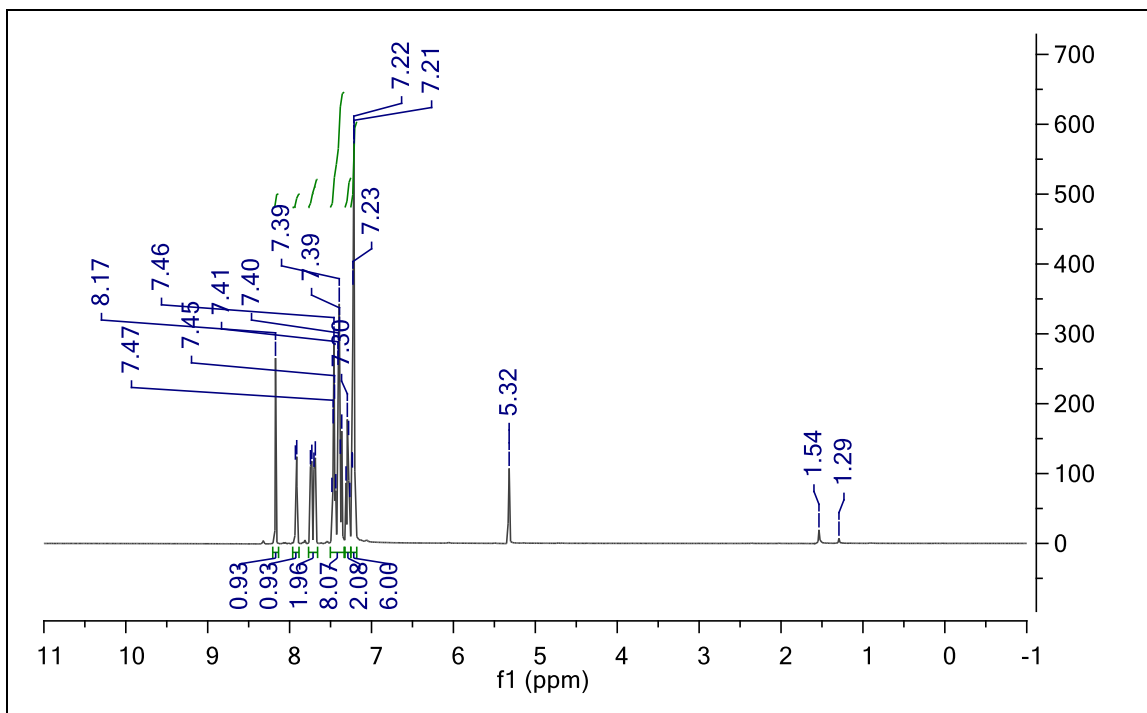

**FIG 80** 23HNBT,  $^1\text{H}$  NMR (500 MHz,  $\text{CD}_2\text{Cl}_2$ )

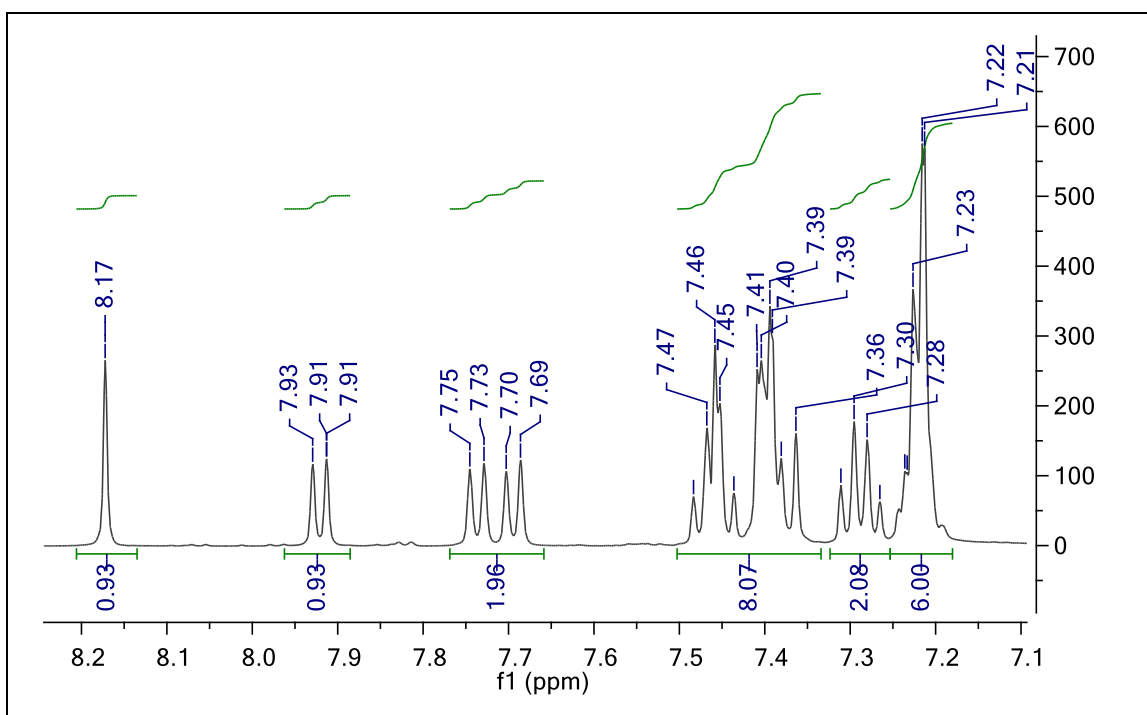

**FIG 81** 23HNBT,  $^1\text{H}$  NMR (500 MHz,  $\text{CD}_2\text{Cl}_2$ )  $\delta$  8.17, 7.93, 7.91, 7.75, 7.73, 7.70, 7.69, 7.48, 7.47, 7.46, 7.45, 7.44, 7.41, 7.40, 7.39, 7.39, 7.38, 7.36, 7.31, 7.30, 7.28, 7.27, 7.24, 7.23, 7.23, 7.22, 7.21, 5.32, 1.54, 1.29.

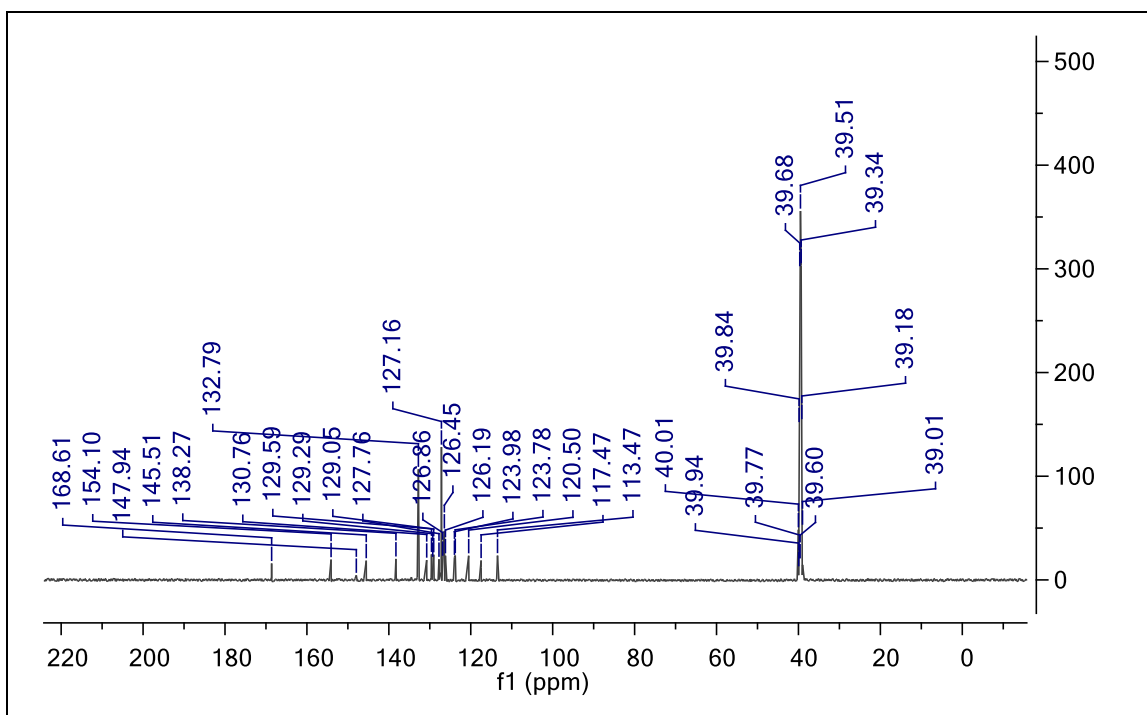

FIG 82 23HNBT, <sup>13</sup>C NMR (126 MHz, dmsol)

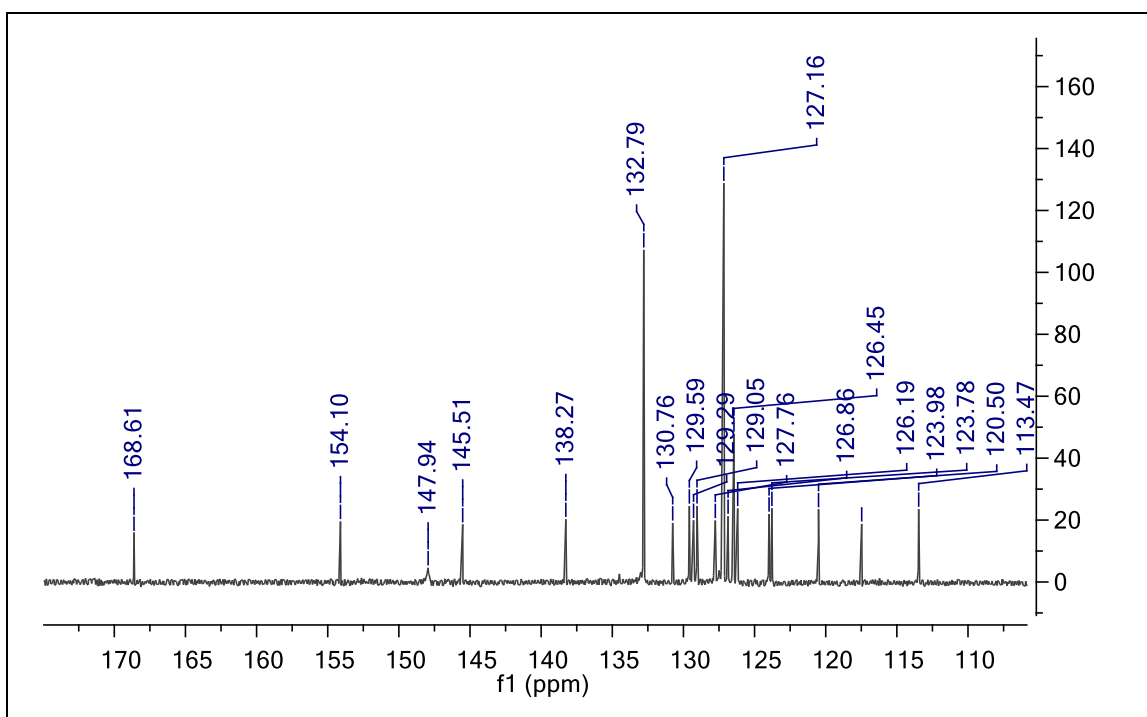

FIG 83 23HNBT, <sup>13</sup>C NMR (126 MHz, dmsol)  $\delta$  168.61, 154.10, 147.94, 145.51, 138.27, 132.79, 130.76, 129.59, 129.29, 129.05, 127.76, **127.16**, **127.16**, 126.86, 126.45, 126.19, 123.98, 123.78, 120.50, 117.47, 113.47, 40.01, 39.94, 39.84, 39.77, 39.68, 39.60, 39.51, 39.34, 39.18, 39.01.

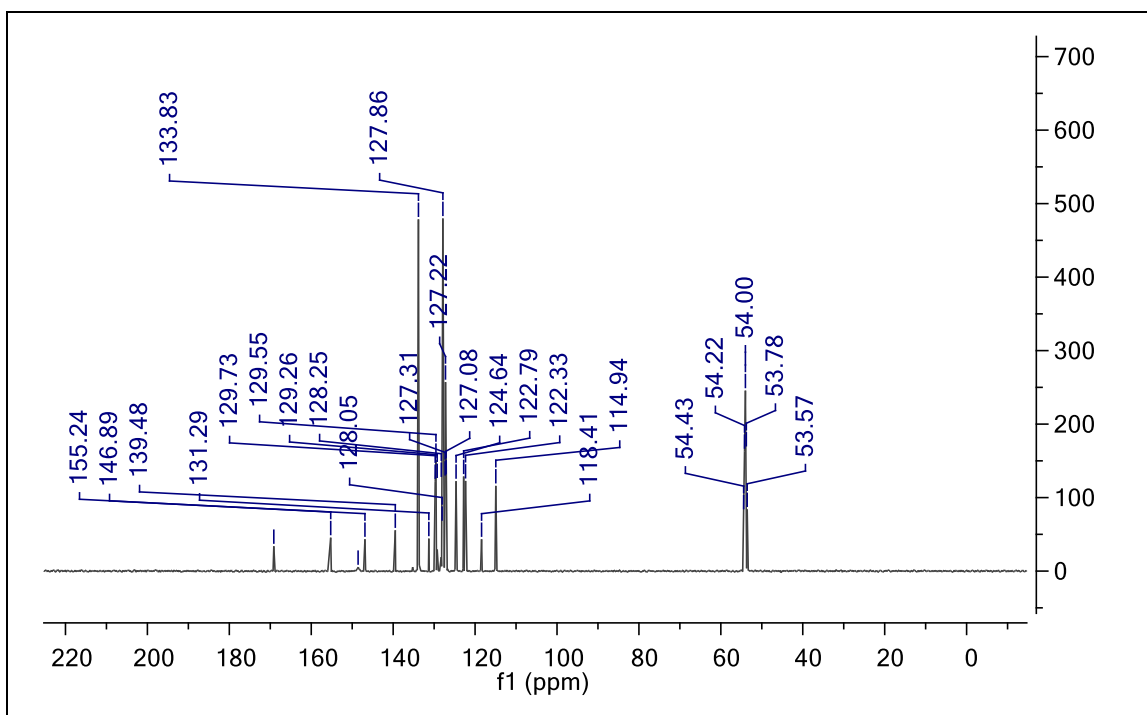

**FIG 84** 23HNBT,  $^{13}\text{C}$  NMR (126 MHz,  $\text{cd}_2\text{cl}_2$ )

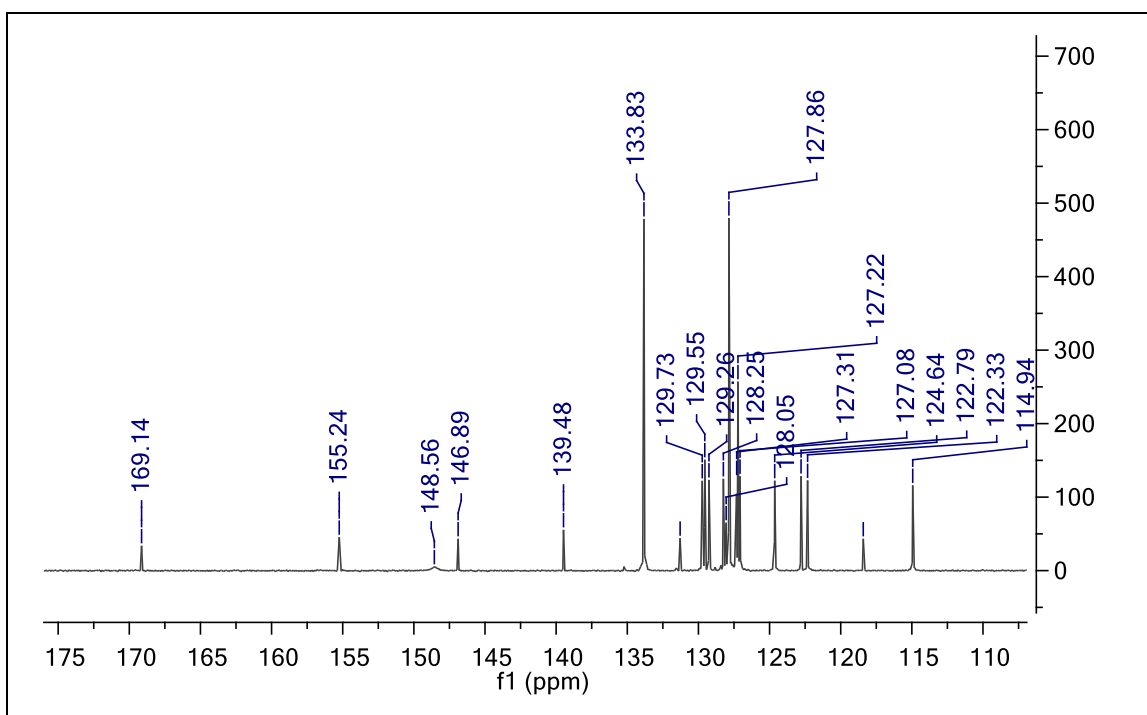

**FIG 85** 23HNBT,  $^{13}\text{C}$  NMR (126 MHz,  $\text{cd}_2\text{cl}_2$ )  $\delta$  169.14, 155.24, 148.56, 146.89, 139.48, 133.83, 131.29, 129.73, 129.55, 129.26, 128.25, 128.05, 127.86, 127.31, 127.22, 127.08, 124.64, 122.79, 122.33, 118.41, 114.94, 54.43, 54.22, 54.00, 53.78, 53.57.



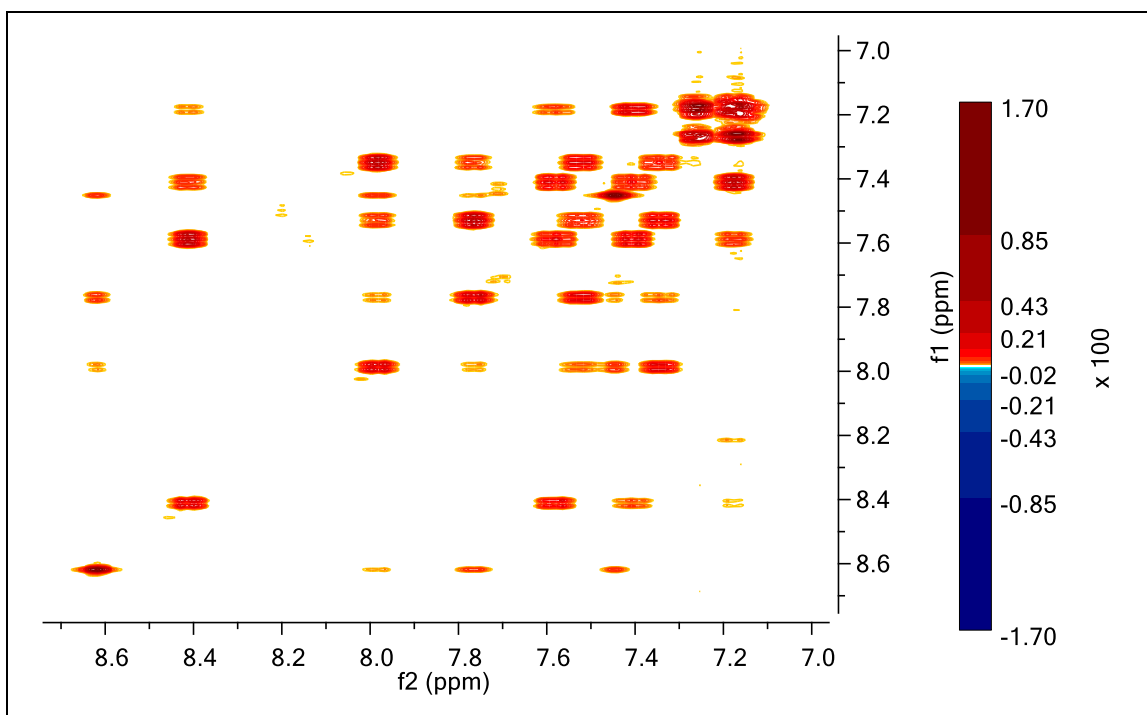

**FIG 86** 23HNBT, G-COSY (dmsol)

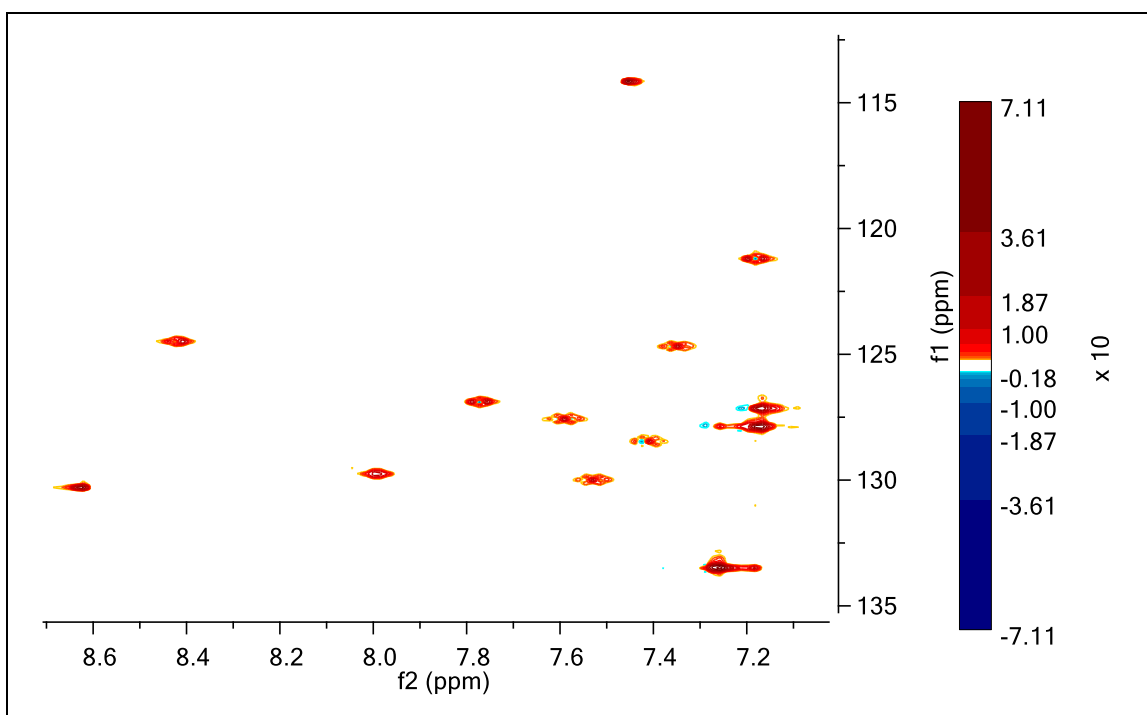

**FIG 87** 23HNBT, G-HMQC (dmsol)

NMR data of 8a

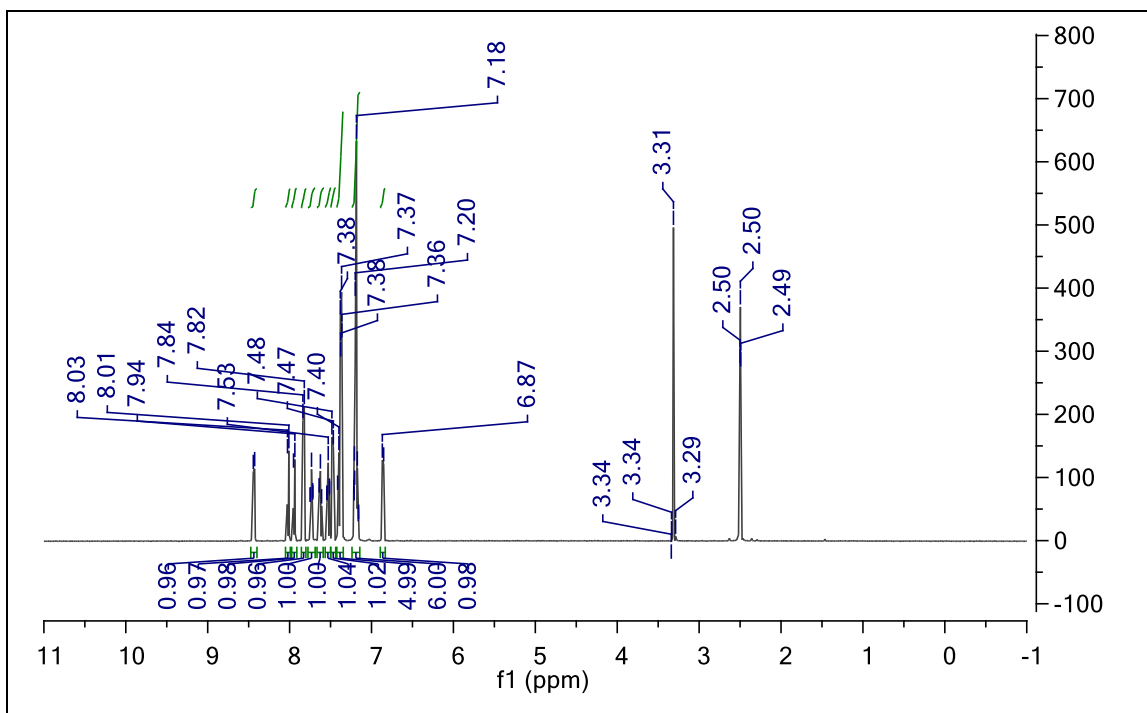

FIG 60 12HNBO, <sup>1</sup>H NMR (500 MHz, dmsol)

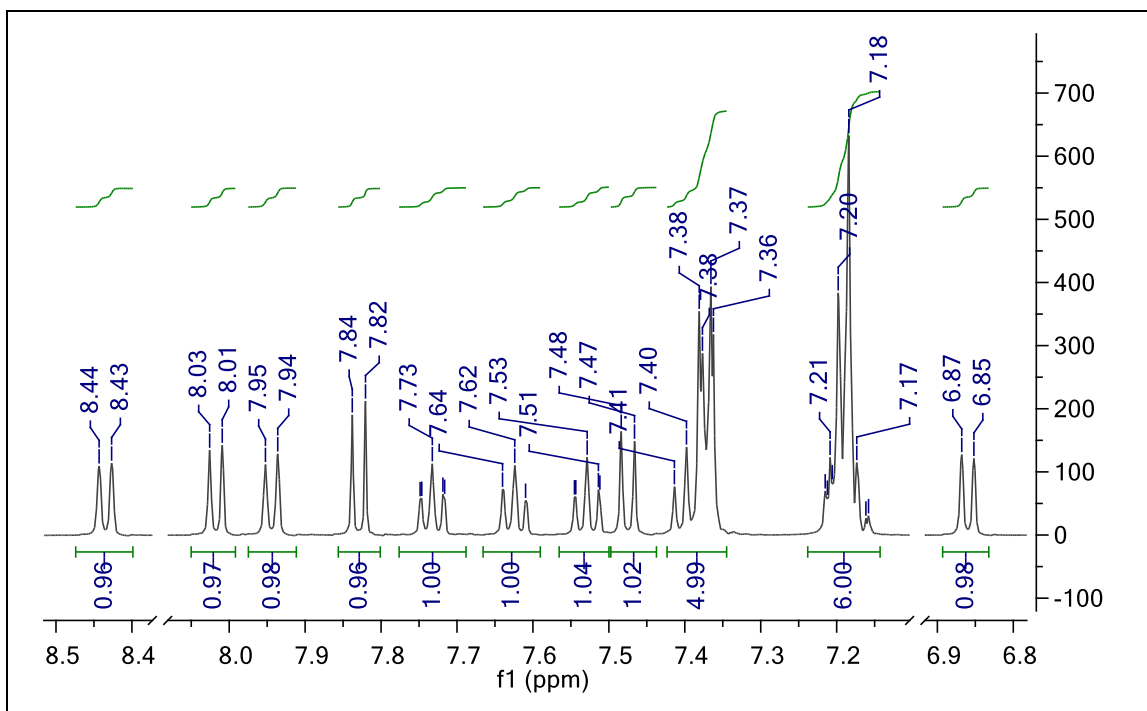

FIG 61 12HNBO, <sup>1</sup>H NMR (500 MHz, dmsol)  $\delta$  8.44, 8.43, 8.03, 8.01, 7.95, 7.94, 7.84, 7.82, 7.75, 7.75, 7.73, 7.72, 7.72, 7.64, 7.62, 7.61, 7.55, 7.54, 7.53, 7.51, 7.51, 7.48, 7.47, 7.41, 7.40, 7.38, 7.38, 7.37, 7.36, 7.22, 7.21, 7.21, 7.20, 7.18, 7.17, 7.16, 7.16, 6.87, 6.85, 3.34, 3.34, 3.31, 3.29, 2.50, 2.50, 2.49.

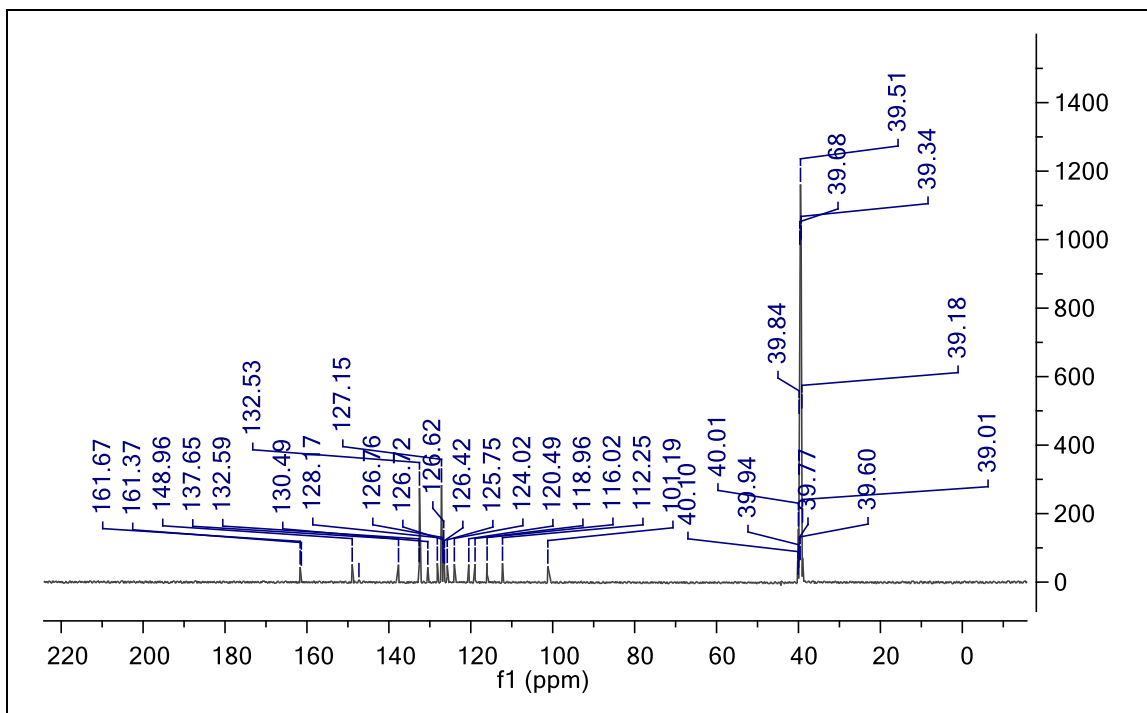

**FIG 62** 12HNBO,  $^{13}\text{C}$  NMR (126 MHz, dmsol)

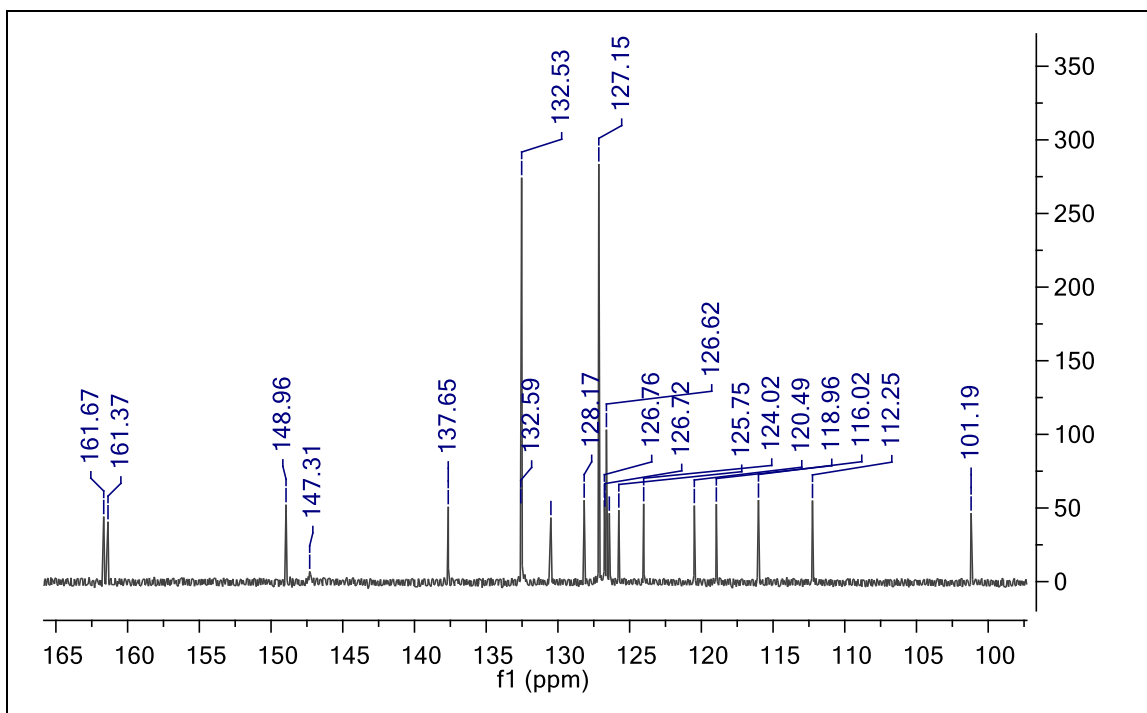

**FIG 63** 12HNBO,  $^{13}\text{C}$  NMR (126 MHz, dmsol)  $\delta$  161.67, 161.37, 148.96, 147.31, 137.65, 132.59, 132.53, 130.49, 128.17, 127.15, 126.76, 126.72, 126.62, 126.42, 125.75, 124.02, 120.49, 118.96, 116.02, 112.25, 101.19, 40.10, 40.01, 39.94, 39.84, 39.77, 39.68, 39.60, 39.51, 39.34, 39.18, 39.01.

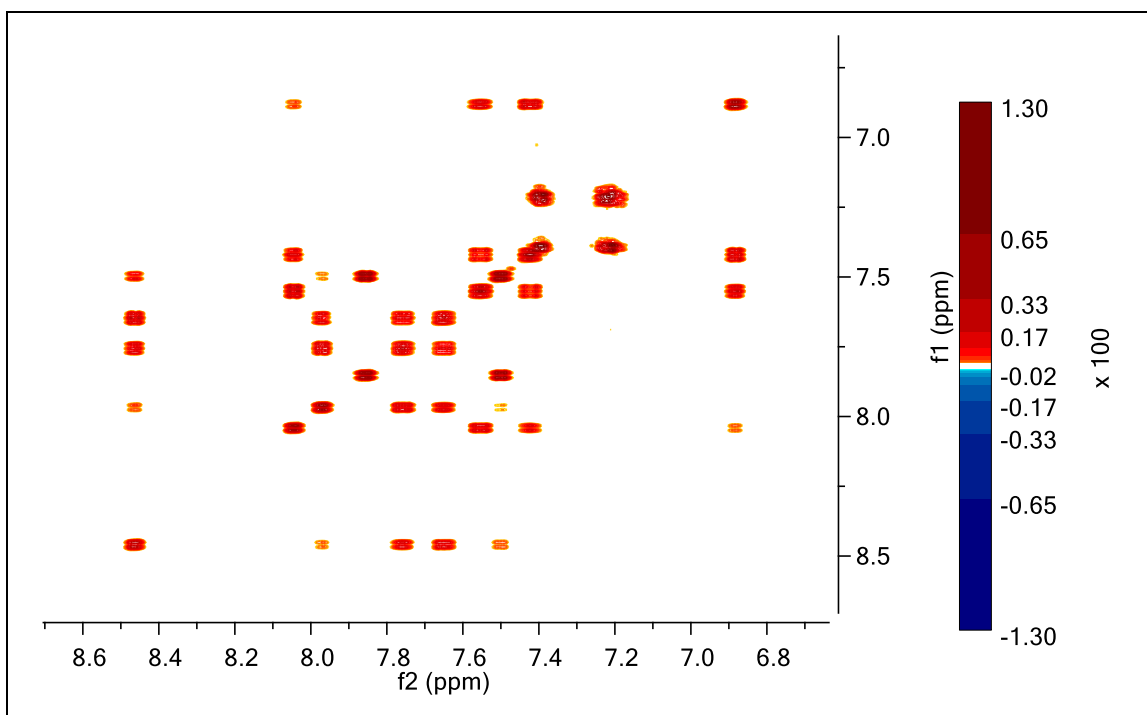

**FIG 64** 12HNBO, G-COSY (dmsol)

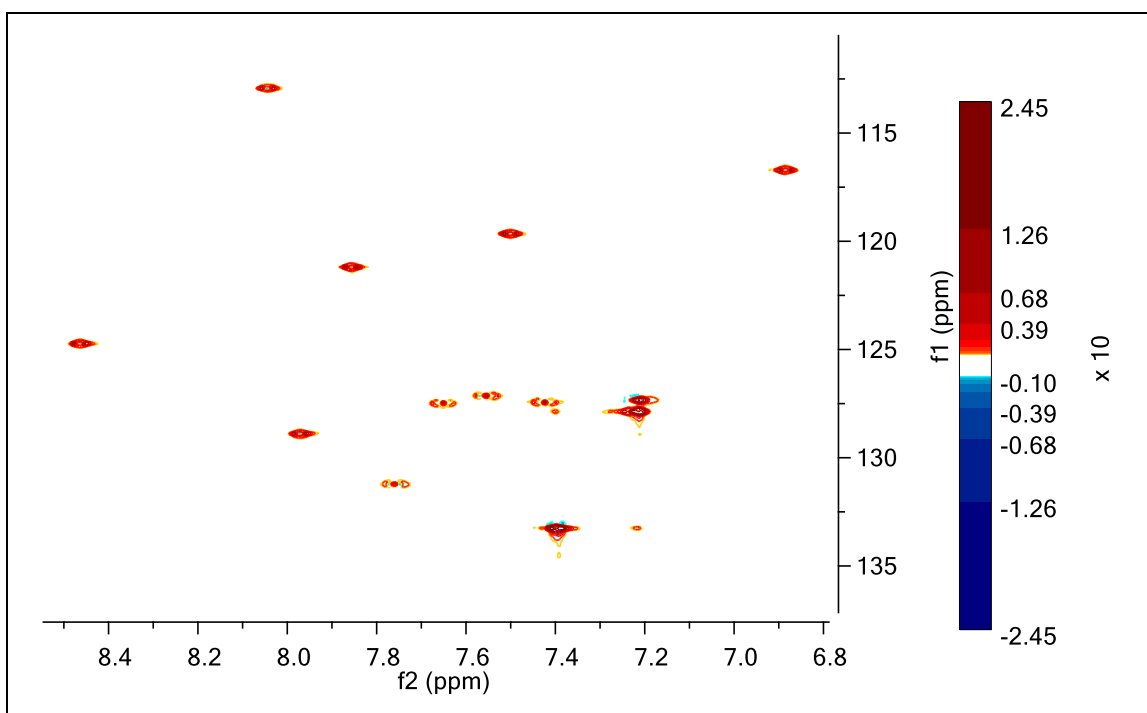

**FIG 65** 12HNBO, G-HMQC (dmsol)

NMR data of 8b

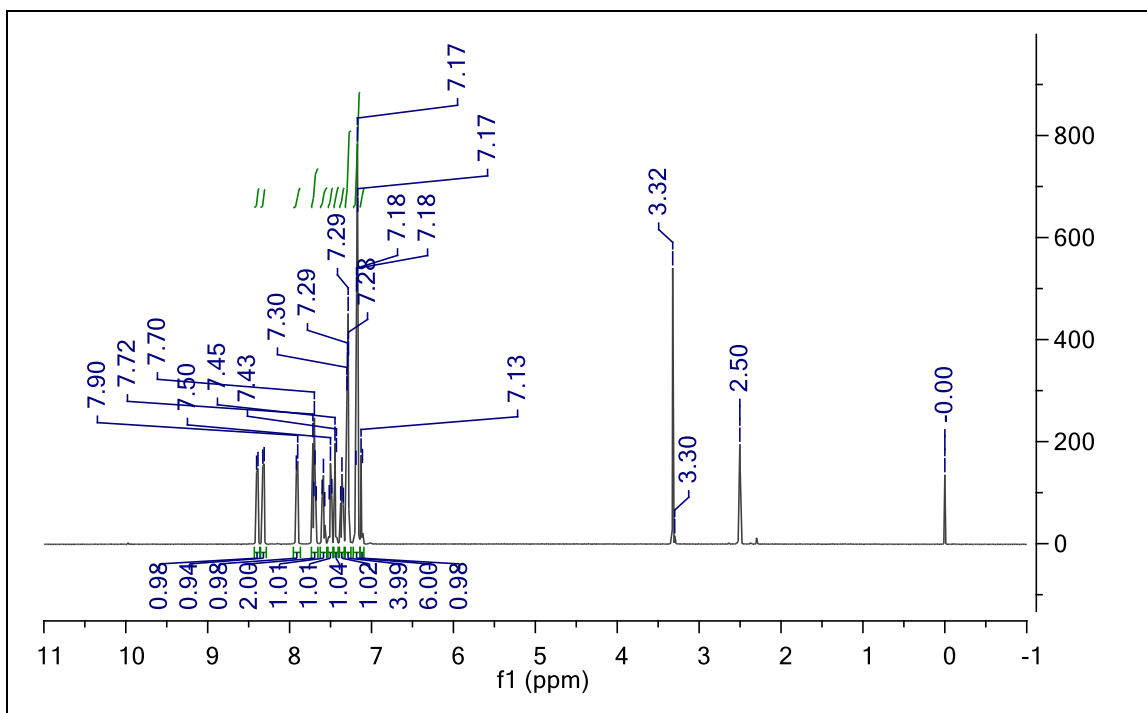

FIG 66 12HNBT, <sup>1</sup>H NMR (500 MHz, dmsol)

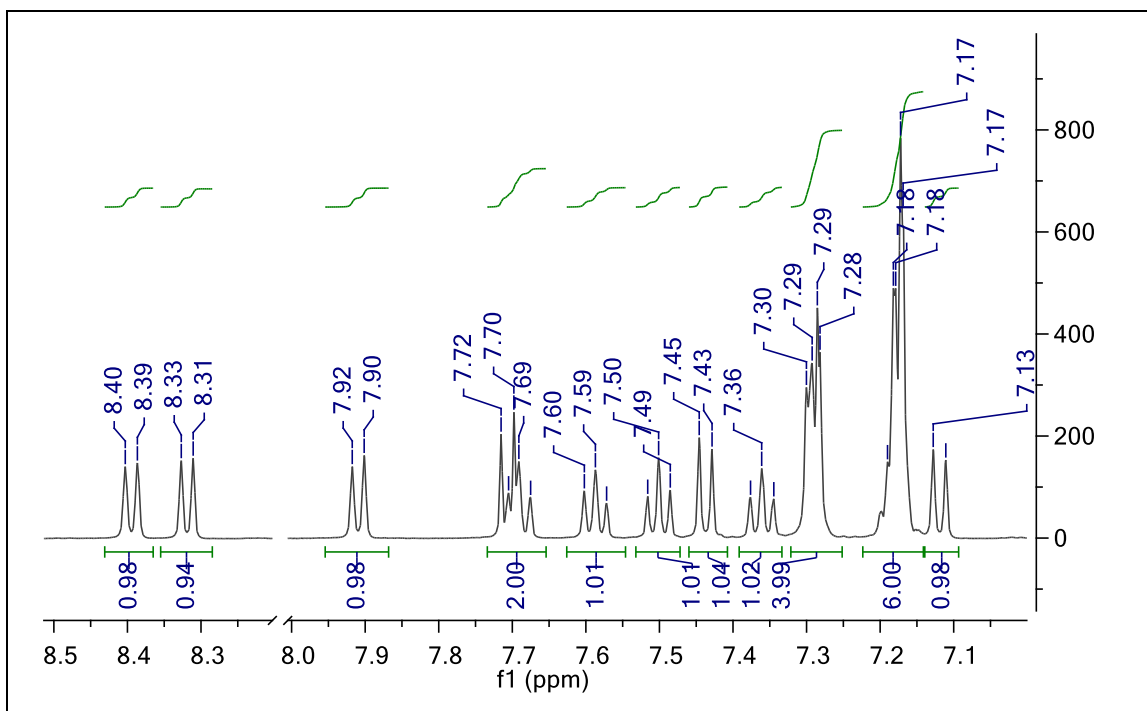

FIG 67 12HNBT, <sup>1</sup>H NMR (500 MHz, dmsol)  $\delta$  8.40, 8.39, 8.33, 8.31, 7.92, 7.90, 7.72, 7.71, 7.70, 7.69, 7.68, 7.60, 7.59, 7.57, 7.52, 7.50, 7.49, 7.45, 7.43, 7.38, 7.36, 7.34, 7.30, 7.29, 7.29, 7.28, 7.19, 7.18, 7.18, 7.17, 7.17, 7.13, 7.11, 3.32, 3.30, 2.50, -0.00.

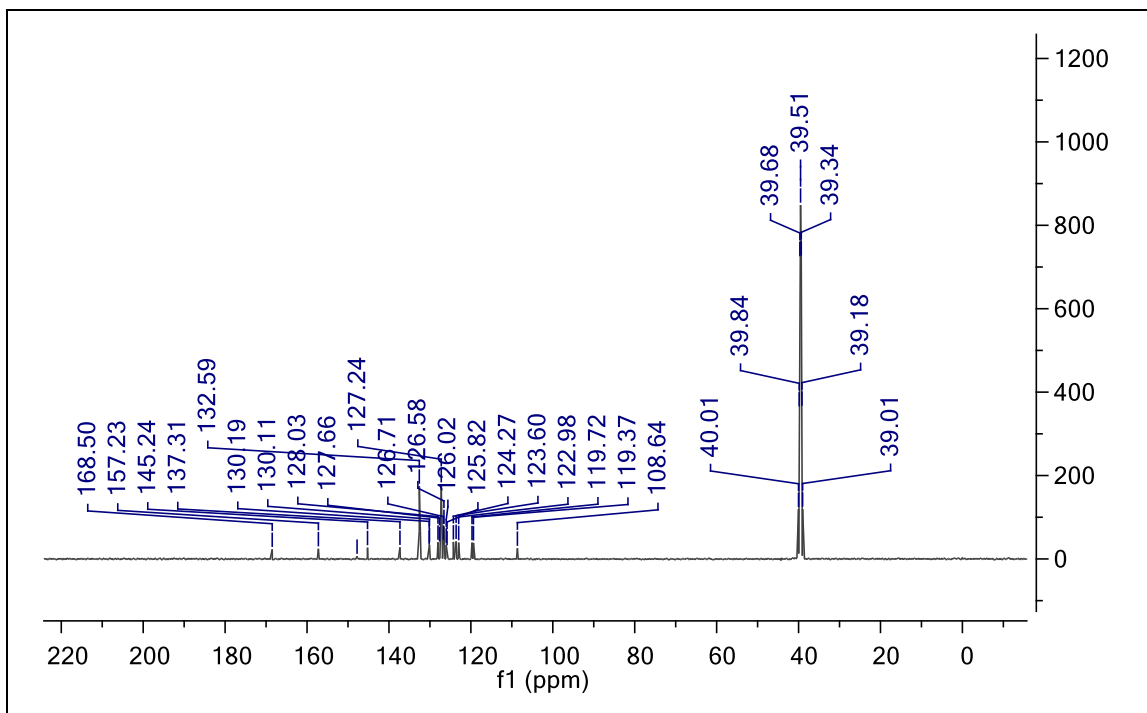

**FIG 68** 12HNBT,  $^{13}\text{C}$  NMR (126 MHz, dmsol)

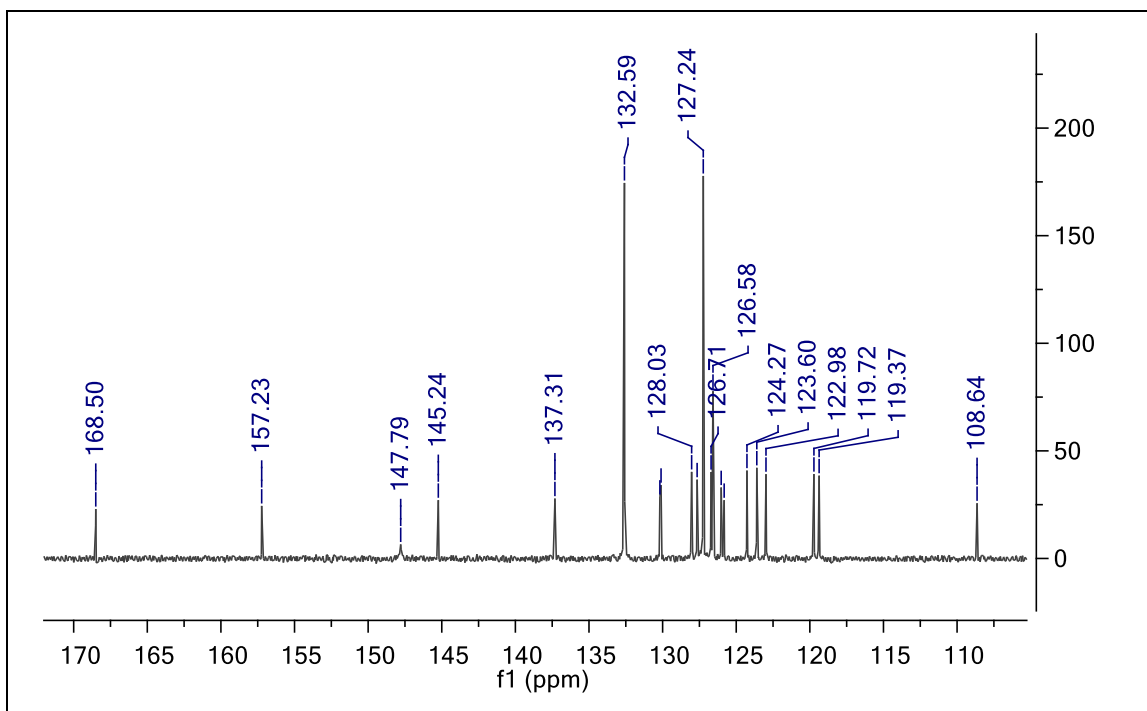

**FIG 69** 12HNBT,  $^{13}\text{C}$  NMR (126 MHz, dmsol)  $\delta$  168.50, 157.23, 147.79, 145.24, 137.31, 132.59, 130.19, 130.11, 128.03, 127.66, 127.24, 126.71, 126.58, 126.02, 125.82, 124.27, 123.60, 122.98, 119.72, 119.37, 108.64, 40.01, 39.84, 39.68, 39.51, 39.34, 39.18, 39.01.

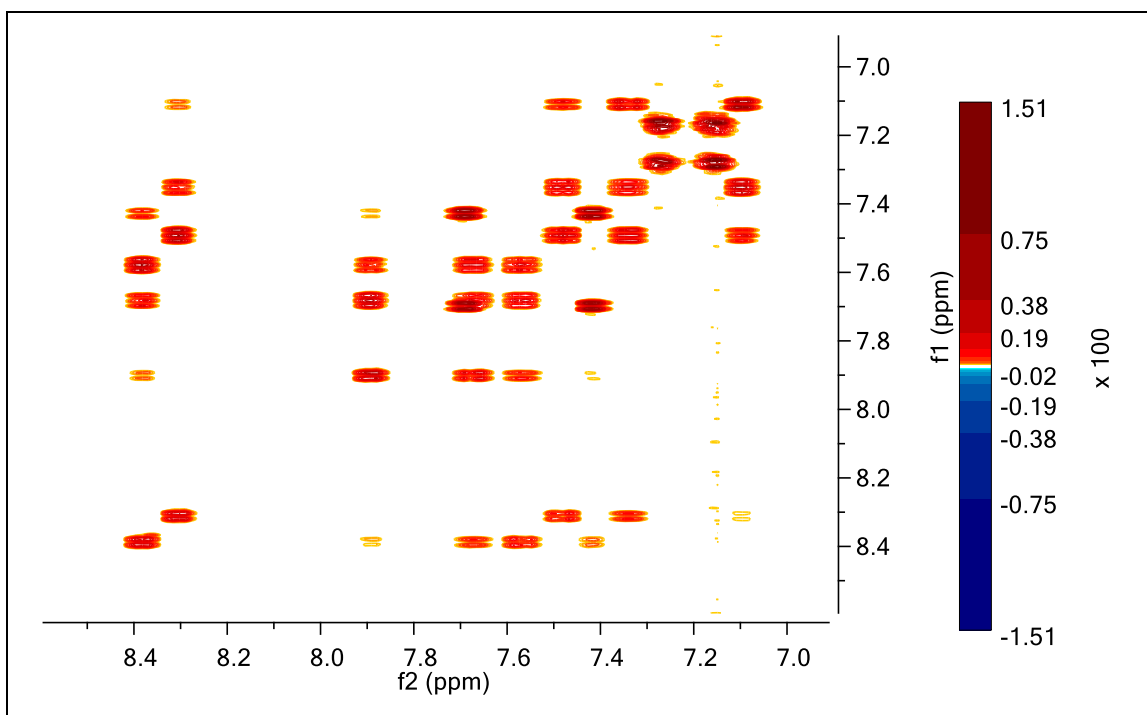

**FIG 70** 12HNBT, G-COSY (dmsol)

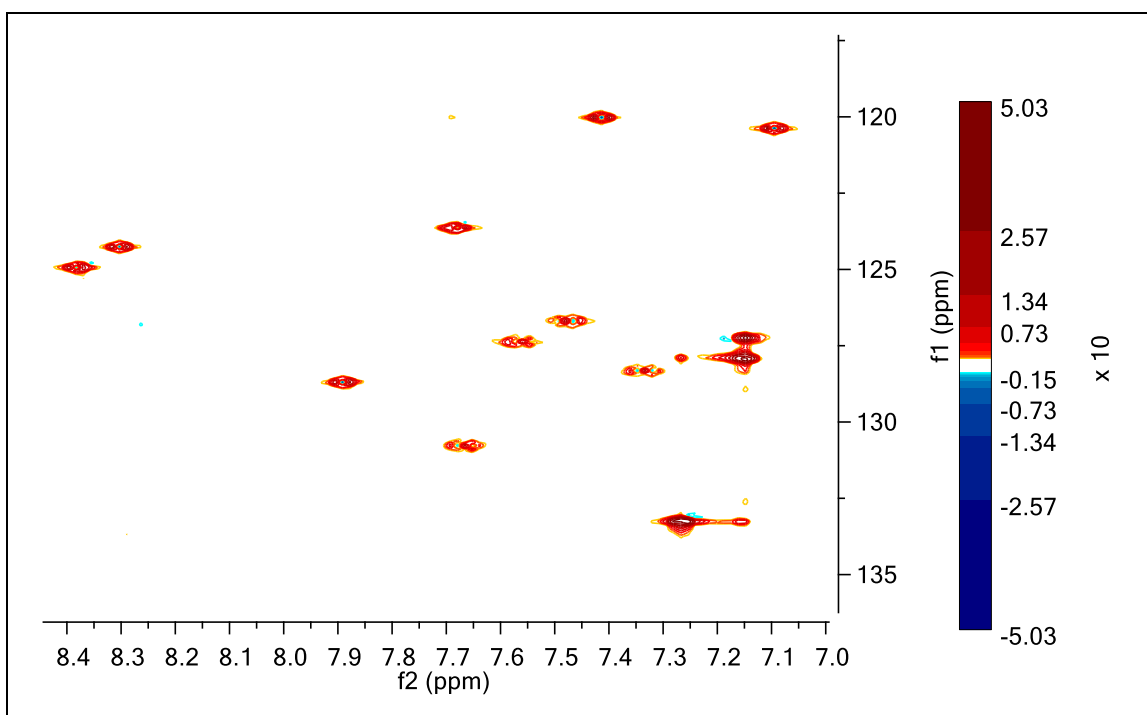

**FIG 71** 12HNBT, G-HMQC (dmsol)
